# Supplementary material for: Climate changes in Anatolia across the late Eocene and the Eocene-Oligocene Transition: successive warming and cooling, aridification, and implications for the westward dispersal of Asian terrestrial mammals
Source: Copernicus journal article supplement (doi:10.5194/egusphere-2025-6383), 2026-01-23
Supplement: Supplementary file 1 [file Supplementary table 1 - pmag sample results.xlsx]

## Sheet: Feuil1
Sample	Confidence level	Polarity	AF/Thermal	NRM intensity (A/m)	Rock Type	Level (m) refered to Licht et al. (2022)	VGP Lat (°)	VGP Long. (°)	Dec. (°)	Inc. (°)	MAD (°)
BT001	A	N	AF	0.07063	Silt-Clay	153.5	61.33	213.24	0.5442	21.2439	3.1438
BT003	A	N	AF	0.07629	Silt/VFS	154.5	58.53	244.36	344.5486	21.8321	8050-02-01
BT004	A	N	AF	0.04769	Silt	159	59.57	233.15	350.4378	20.2290	4614-03-01
BT006	A	N	AF	0.05995	Silt-Clay	161	66.05	205.24	3.8252	29.7353	5487-03-01
BT008_2	A	N	Thermal	0.09982	Fine Sand	163.5	36.06	279.42	312.4481	12.8608	8100-02-01
BT010_1	A	N	AF	0.2140	Fine Sand	167	53.16	242.90	343.2465	11.9687	9221-01-01			Confidence level
BT010_2	A	N	Thermal	0.1661	Fine Sand	167	60.91	236.68	349.0957	23.4007	5.1856			A : consistent demagnetization behaviour - very high reliability
BT011_1	A	N	AF	0.09857	Fine Sand	171	55.18	217.75	358.0549	9.7143	3482-01-01			B : noisy demagnetization behaviour - high reliability
BT011_2	A	N	Thermal	0.1194	Fine Sand	171	53.95	233.62	348.7548	10.0708	6831-04-01
BT013_1	A	N	AF	0.2045	Fine Sand	173.3	61.9	228.67	353.1549	23.4180	6553-01-01			C : very noisy demagnetization behaviour - medium reliability
BT013_2	A	N	Thermal	0.1819	Fine Sand	173.3	68.27	232.87	352.8576	34.2832	8673-10-01
BT014	C	R	AF	0.06896	Silt-Clay	181.8	6.55	285.70	287.1499	-19.2187	4747-05-01			D : unstable demagnetization behaviour - low reliability
BT015	B	N	AF	0.08894	Silt-Clay	181.9	-34.68	53.78	163.6497	25.6771	9890-02-01
BT016_1	A	N	AF	0.08413	Fine Sand	184	56	234.52	348.7907	14.1361	9965-02-01
BT016_2	A	N	Thermal	0.1095	Fine Sand	184	51.7	223.93	354.0661	3.4862	2260-05-01
BT017_1	A	N	AF	0.01462	Fine Sand	187.5	66.67	134.18	27.4761	51.6306	5.1049			Latitude	Longitude
BT017_2	A	N	Thermal	0.01682	Fine Sand	187.5	63.48	123.53	33.1015	54.6442	6006-12-01
BT018_1	D	N	AF	0.1386	Fine Sand	191	-6.98	91.54	117.6287	35.5465	2.0555
BT018_2	B	N	Thermal	0.2955	Fine Sand	191	-17.65	80.25	133.8087	33.7470	7485-02-01			39 39 43.1 N	34 20 15.3
BT019	B	N	AF	0.1344	Fine Sand	194	49.21	225.09	353.0038	-1.2512	2881-02-01
BT020_1	A	N	AF	0.3292	Silt	194.5	55.74	231.77	350.2347	12.9189	5965-01-01			*AF : Alternalting Field
BT020_2	A	N	Thermal	0.4243	Silt	194.5	56.82	238.32	347.0006	16.7880	3722-04-01
BT021	A	N	AF	0.3321	Silt/VFS	195.3	48.91	211.16	2.0929	-2.7733	0.9554
BT022	A	N	AF*	0.1787	Clay	199	60.73	238.65	348.1082	23.6379	4527-06-01
BT023	A	N	AF	0.3544	Silt-Clay	201	61.05	215.78	350.3831	20.6749	0.7809
BT025	A	N	AF	0.2133	Silt	202.6	64.67	222.49	356.4132	27.4041	1.0112
BT026	A	N	AF	0.2290	Fine Sand	204.5	63.6	233.13	351.4973	27.0796	2.0711
BT028_1	A	N	AF	0.1677	Fine Sand	207.1	51.96	219.08	357.0760	3.4296	6787-02-01
BT028_2	A	N	Thermal	0.2000	Fine Sand	207.1	55.17	222.82	355.1531	10.1419	6.0236
BT029	A	N	AF	0.3221	Silt	208.3	37.71	283.25	311.4764	19.1718	3592-01-01
BT030	C	N	AF	0.008313	Clay	210	28.5	275.60	309.5842	-2.3780	14.2854
BT032	A	R	AF	0.5395	Silt	211.3	-42.68	352.53	209.3478	-1.2423	1.0391
BT033_1	A	N	AF	0.08230	Silt-Clay	212.3	64.51	221.36	357.0357	26.8584	4557-03-01
BT034	B	N	AF	0.01600	Clay	214.5	61.11	240.61	347.3244	24.8218	13.4639
BT035	A	N	AF	0.1177	Clay	216.1	52.89	238.22	345.8062	9.5982	6809-02-01
BT036	B	N	AF	0.5578	Silt-Clay	217.2	53.09	164.34	28.0869	23.5773	0.9999
BT037	A	N	AF	0.2648	Fine Sand	217.7	54.8	232.82	349.4153	11.4285	0.8897
BT039	A	N	AF	0.01393	Clay	220.8	49.52	278.73	322.5624	29.2301	6289-10-01
BT040_1	A	N	AF	0.02460	Clay	222.2	53.15	238.98	348.3020	3.8814	15.0302
BT040_2	A	N	Thermal	0.02457	Clay	222.2	51.7	255.46	335.6917	15.9468	6.0523
BT041	C	N	AF	0.01441	Clay	224.1	53.47	220.30	356.4486	6.5310	2447-09-01
BT043	A	N	AF	0.04799	Clay	226.5	36.08	290.47	306.3326	24.9563	6607-03-01
BT044_2	B	N	Thermal	0.002262	Clay	227	75.2	265.84	346.6978	48.6969	8584-12-01
BT045_2	A	N	Thermal	0.003402	Clay	228	53.15	210.06	0.9015	9.3589	2028-06-01
BT046	A	N	AF	0.004005	Clay	229	43.84	186.31	20.8093	-31.0223	17.3287
BT047_1	B	R	Thermal	0.0009073	Clay	230.5	-34.32	313.04	237.8244	-28.6639	32.5320
BT048_2	A	N	Thermal	0.005733	Clay	232	47.24	223.01	354.1179	-5.5001	12.0675
BT049_2	B	N	Thermal	0.0009239	Clay	233	50.79	232.49	348.6433	3.6817	7469-11-01
BT050	B	N	Thermal	0.001666	Clay	234	55.24	210.55	2.1683	9.8381	9529-06-01
BT051	A	N	AF	0.008801	Clay	235.8	64.02	265.88	338.3927	38.0058	16.9073
BT052	A	N	AF	0.04274	Clay	239.3	54.53	220.78	356.2566	8.6604	3190-04-01
BT053	A	N	AF	0.003771	Clay	242	62.15	243.19	346.5443	27.2540	14.4371
BT054	D		AF	0.004253	Clay	244.8	8.93	326.65	262.5284	40.0696	9563-04-01
BT055	B	N	AF	0.01013	Clay	245.7	71.53	204.69	3.2696	38.0915	4.0938
BT056_1	A	N	AF	0.02166	Clay	246.2	65.86	164.45	19.7597	39.3718	4577-08-01
BT057	A	N	AF	0.01384	Clay	247	64.29	222.05	356.5614	26.7251	7793-09-01
BT058	A	N	AF	0.005166	Clay	248.4	62.44	159.05	24.0858	37.9302	22.0955
BT059	C	N	AF	0.002988	Clay	250	70.34	194.42	7.0463	37.4429	22.4897
BT060	A	N	AF	0.01577	Clay	253	58.05	248.23	342.4552	22.5601	8360-06-01
BT061	A	N	AF	0.01626	Clay	255	61.37	178.47	16.9141	28.4253	9024-10-01
BT062b	A	N	AF	0.07020	Clay	259	50.4	211.75	1.6492	0.1822	4.0452
BT064	A	N	AF	0.02467	Silt-Clay	264	62.38	197.85	7.7554	24.6197	11.0194
BT065	A	N	AF	0.07235	Silt-Clay	266	52.6	232.34	349.1583	7.1073	8796-02-01
BT069	A	N	AF	0.03501	Paleosoil/Caliche	268.5	59.71	249.54	342.5995	25.6889	1902-05-01
BT071	A	N	AF	0.01849	Clay	274	62.18	269.52	335.7629	37.5976	8897-04-01
BT072	D		AF	0.1509	Clay	276	16.68	290.93	291.2729	1.3963	3290-05-01
BT073	A	N	AF	0.04049	Silt-Clay	278.3	54.45	276.13	327.4185	32.8895	6.1178
BT074	A	N	AF	0.03039	Silt-Clay	279.1	62.23	260.33	339.3240	33.6216	6491-02-01
BT075	A	N	AF	0.04744	Silt-Clay	282.2	51.61	285.85	321.0668	36.6542	9331-04-01
BT076	A	N	AF	0.02970	Clay	284	61.9	273.89	333.9674	39.3393	3600-02-01
BT077	A	N	AF	0.03520	Clay	284.8	84	128.70	7.7021	58.2562	6494-03-01
BT078_1	B	R	AF	0.01217	Clay	285.4	53.3	231.15	350.0167	8.1263	13.8034
BT079_1	B	R	AF	0.01177	Clay	286	38.73	156.37	41.5714	9.2094	6136-06-01
BT080	B	R	AF	0.008856	Clay	287	-52.68	93.85	147.1288	-29.3628	4880-10-01
BT081	A	R	AF	0.002350	Clay	288.5	-70.06	25.85	183.0715	-35.9030	7227-12-01
BT082	A	N	AF	0.04691	Clay	291	57.56	273.76	330.7303	34.8301	7003-06-01
BT084	A	N	AF	0.04772	Paleosoil/Caliche	293.2	31.27	293.14	301.0936	22.5831	3451-06-01
BT085	A	N	AF	0.09666	Paleosoil/Caliche	296	22.7	292.01	295.1325	10.7628	6220-10-01
BT087	A	N	AF	0.02012	Silt	298.5	68.63	283.92	336.8276	48.8372	4.0442
BT092	A	N	AF	0.02897	Clay	305	51.21	240.33	344.0293	7.3025	3159-04-01
BT094	A	N	AF	0.03128	Silt	306.9	62.55	264.77	337.8048	35.8958	7584-04-01
BT096	A	N	AF	0.2600	Silt	309.5	61.76	263.50	337.7656	34.4244	3561-04-01
BT097	A	N	AF	0.02035	Silt	313.6	66.2	216.89	358.9341	29.6327	8799-07-01
BT098	D	N	AF	0.03039	Silt	316	28.9	109.94	74.6279	47.2833	8119-06-01
BT099	A	N	AF	0.02665	Silt	317.3	64.39	238.00	349.6216	29.3603	7418-06-01
BT100	A	N	AF	0.04759	Silt	318.5	70.33	240.99	350.6507	38.4777	3982-03-01
BT102	A	N	AF	0.08782	Silt	320.4	72.75	254.02	347.8675	43.9193	4690-06-01
BT103	A	N	AF	0.8904	Silt	322.7	70.26	180.52	11.7518	39.8237	4.0292
BT105	A	N	AF	0.1319	Silt	325.5	73.33	149.16	17.7329	50.5129	4771-08-01
BT106	B	N	AF	0.1705	Silt	326.5	-20.7	60.23	153.2173	42.9732	8836-12-01
BT107	A	N	AF	0.01883	Silt	329.5	54.25	275.66	327.4676	32.3725	9799-04-01
BT111	A	N	AF	0.03539	Silt	331.6	69.46	240.05	350.6263	37.1484	4946-03-01
BT112	A	N	AF	0.1064	Silt	333.9	61.15	267.15	335.9307	35.3711	3.0151
BT114	A	N	AF	0.0006859	Clay	335.2	39.35	293.10	307.6108	31.0782	5417-12-01
BT115	A	R	AF	0.08261	Silt	337.4	-53.15	355.95	202.1285	-16.7541	3.1027
BT116	A	N	AF	0.05970	Silt	339	54.95	250.45	339.9264	18.5334	3561-03-01
BT118	A	N	AF	0.08738	Silt	342.6	65.55	242.21	348.2974	32.1046	6991-02-01
BT119	C	R	AF	0.02667	Silt	345	-1.71	122.92	92.2208	-36.0178	4097-04-01
