# Supplementary material for: Climate changes in Anatolia across the late Eocene and the Eocene-Oligocene Transition: successive warming and cooling, aridification, and implications for the westward dispersal of Asian terrestrial mammals
Source: Copernicus journal article supplement (doi:10.5194/egusphere-2025-6383), 2026-01-23
Supplement: Supplementary file 3 [file Supplementary table 2 - correlation rates.xlsx]

## Sheet: Feuil1
Supplementary Table XXX. Accumulation rates for the three correlation hypotheses considered in the study
Retained Hypothesis			Hypothesis 2			Hypothesis 3
Chron/ magnetozone	Accumulation rates		Chron/ magnetozone	Accumulation rates		Chron/ magnetozone	Accumulation rates
C12r/R1	4,5 cm/ka		C12r/R1	4,5 cm/ka		C12r/R1	4,5 cm/ka
C13n/N1	9,3 cm/ka*		C13n/N1	9,3 cm/ka*		C13n/N1	9,3 cm/ka*
C16n.1n/N2	4,3 cm/ka*		C16n.2n/N2	1 cm/ka*		C15n/N2	2,6 cm/ka*
C16n.1r/R2	5,3 cm/ka		C16r/R2	1,8 cm/ka		C15r/R2	1,6 cm/ka
C16n.2n/N3	3,1 cm/ka*		C17n.1n/N3	1,6 cm/ka*		C16n.1n/N3	13,0 cm/ka*
Base of 17n.3n to base of C16n.1r / N4	7,8 cm/ka*		Base of C17n.3n to base of C17n.2n /N4	39,3 cm/ka*		Base of C17n.3n to base of C16n.1r /N4	5,1cm/ka*
* Minimum accumulation rates
