# Supplementary material for: Climate changes in Anatolia across the late Eocene and the Eocene-Oligocene Transition: successive warming and cooling, aridification, and implications for the westward dispersal of Asian terrestrial mammals
Source: Copernicus journal article supplement (doi:10.5194/egusphere-2025-6383), 2026-01-23
Supplement: Supplementary file 5 [file Supplementary table 3- Stable Isotope results.xlsx]

## Sheet: Stable Isotopes Results
Sample	weight	level (m)	d13C	internal error	d18O	internal error	mineralogy
18-CIC-09	140	253	-6.50155	0.016971	-5.99007	0.0479918	Calcite
18-CIC-10	196	285	-5.61127	0.0175879	-5.79828	0.0438608	Calcite
18-CIC-11	113	276	-6.7439	0.0179035	-6.50044	0.0424239	Calcite
18-CIC-12	106	295	-5.18092	0.0174952	-5.79727	0.0424568	Calcite
18-CIC-13	145	302	-5.87596	0.0155658	-5.72399	0.0364705	Calcite
18-CIC-14	100	319	-7.80718	0.0256253	-6.08227	0.0846176	Calcite
18-CIC-15	202	395	-5.98791	0.0176099	-2.85452	0.0396671	Calcite
BTCARB 1	806	220	-7.16225	0.0193666	-4.93887	0.0452552	Calcite
BTCARB 10	107	266.6	-6.35982	0.016333	-5.469	0.0412399	Calcite
BTCARB 11	149	286	-6.3688	0.0162535	-5.86039	0.0397724	Calcite
BTCARB 12	88	291.8	-5.78705	0.0186257	-5.88269	0.0437366	Calcite
BTCARB 13	145	293.1	-6.07205	0.0137455	-5.98784	0.0344267	Calcite
BTCARB 14	200	266	-7.18842	0.0153626	-5.61951	0.0362337	Calcite
BTCARB 15	153	300	-7.06873	0.0161026	-5.81772	0.0459461	Calcite
BTCARB 16	145	304.5	-5.67365	0.0176911	-4.01111	0.0439468	Calcite + Dolomite
BTCARB 17	136	307.1	-6.29338	0.0151782	-5.96316	0.0450806	Calcite
BTCARB 18	146	314	-6.4953	0.0169215	-5.37033	0.0415934	Calcite
BTCARB 24	121	328	-7.82563	0.0151037	-5.73354	0.0333408	Calcite
BTCARB 3	150	262.4	-6.85839	0.0159259	-5.76622	0.0421833	Calcite
BTCARB 4	141	263.7	-7.34475	0.0173612	-6.10456	0.0392923	Calcite
BTCARB 5	152	265	-6.4951	0.0168524	-5.59083	0.0440107	Calcite
BTCARB 6	155	266	-6.97778	0.0146308	-5.63048	0.0388669	Calcite
BTCARB 7	143	267	-6.6172	0.016407	-5.1408	0.0404671	Calcite
BTCARB 8	104	266	-6.57387	0.0161927	-5.49203	0.0460427	Calcite
BTCARB 9	114	266.2	-6.57915	0.0184103	-5.46733	0.0460329	Calcite
