# Supplementary material for: Climate changes in Anatolia across the late Eocene and the Eocene-Oligocene Transition: successive warming and cooling, aridification, and implications for the westward dispersal of Asian terrestrial mammals
Source: Copernicus journal article supplement (doi:10.5194/egusphere-2025-6383), 2026-01-23
Supplement: Supplementary file 7 [file Supplementary table 4- clumped isotopes.xlsx]

## Sheet: synthesis
Secondary standards	N replicates	d13C (in ‰ VPDB)	d18O (in ‰ VPDB)	D47 I-CDES	D47 SD	D47 error (1 SE)	D47 error propagated (1 SE)	D47 error 95% CL	p_Levene	Reconstructed T (Anderson)	T error (1 SE)	T error propagated (1 SE)
Primary standards
ETH-1	96	2.02	-2.22284	0.2052	0.0301	0.00307207
ETH-2	94	-10.17	-18.6764	0.2085	0.0291	0.00300144
ETH-3	147	1.71	-1.74175	0.6132	0.03	0.00247436
ETH-4	46	-10.17	-18.7534	0.4511	0.0271	0.00399568
Unknowns
18CIC09 (Pre-treated)	15	-6.69	-6.11973	0.5915	0.0224	0.00578366	0.0096	± 0.0188	0.107	25.418	1.95415	3.22278
18CIC10 (Pre-treated)	20	-5.81	-5.8407	0.5765	0.0275	0.00614919	0.0078	± 0.0154	0.773	30.6718	2.18711	2.76627
18CIC11 (Pre-treated)	20	-6.94	-6.52386	0.5639	0.0259	0.00579142	0.0078	± 0.0153	0.425	35.3061	2.15624	2.89358
BTCARB05 (Not treated)	17	-6.71	-5.67712	0.5738	0.0247	0.00599063	0.0085	± 0.0167	0.447	31.6473	2.15176	3.03965
BTCARB05-T (Pre-treated)	18	-6.75	-5.71561	0.5953	0.0322	0.00758961	0.0083	± 0.0164	0.609	24.1298	2.52385	2.7568
BTCARB08 (Not treated)	13	-6.8	-5.48468	0.6135	0.0357	0.0099014	0.0097	± 0.0191	0.648	18.1829	3.08902	3.02716
BTCARB08-T (Pre-treated)	16	-6.82	-5.55204	0.595	0.0264	0.0066	0.0087	± 0.0170	0.327	24.2309	2.20063	2.89065
BTCARB09 (Not treated)	12	-6.63	-5.38847	0.6041	0.0243	0.00701481	0.0105	± 0.0205	0.313	21.2093	2.26733	3.3745
BTCARB09-T (Pre-treated)	16	-6.75	-5.5809	0.5955	0.0199	0.004975	0.0089	± 0.0175	0.097	24.0624	1.66053	2.95114
BTCARB10 (Pre-treated)	16	-6.51	-5.56166	0.5583	0.0183	0.004575	0.0089	± 0.0176	0.025	37.435	1.74249	3.36308
BTCARB11 (Pre-treated)	13	-6.54	-5.87918	0.5588	0.0237	0.0065732	0.0098	± 0.0192	0.341	37.2431	2.48982	3.69036
BTCARB13 (Pre-treated)	13	-6.25	-6.13898	0.5819	0.0181	0.00502004	0.0094	± 0.0185	0.055	28.7486	1.75548	3.26236
BTCARB15 (Pre-treated)	17	-7.21	-5.89843	0.5738	0.0285	0.00691227	0.0084	± 0.0165	0.369	31.6473	2.47877	3.00441
BTCARB16 (Pre-treated)	11	-5.84	-4.25307	0.5859	0.0097	0.00292466	0.0104	± 0.0203	0.004	27.3474	1.01229	3.55388
BTCARB17 (Pre-treated)	13	-6.52	-6.05238	0.5916	0.019	0.00526965	0.0094	± 0.0185	0.114	25.3839	1.78142	3.15563
BTCARB18 (Pre-treated)	20	-6.71	-5.5809	0.5776	0.0254	0.00567961	0.0076	± 0.0149	0.496	30.2771	2.01394	2.68587
BTCARB24 (Pre-treated)	17	-7.83	-5.59053	0.6029	0.0268	0.00649995	0.0085	± 0.0166	0.378	21.6025	2.11107	2.75158
Secondary standards
POL2	22	-7.27	-9.07367	0.6872	0.0348	0.00741938	0.0077	± 0.0151	0.524	-2.69985	1.86222	1.9319
VIA1	16	-7.54	-6.96647	0.6314	0.0359	0.008975	0.0086	± 0.0168	0.589	12.669	2.64937	2.54014
VIA2	19	-7.73	-6.92798	0.6176	0.0315	0.0072266	0.0079	± 0.0154	0.641	16.8918	2.2345	2.44009
BDH	17	1.94	-1.95343	0.3028	0.0321	0.00778539	0.009	± 0.0176	0.8	238.804	12.8894	14.8138
IAEA-603	62	2.46	-2.35755	0.3167	0.0301	0.0038227	0.0045	± 0.0087	0.851	216.447	5.65223	6.63341

## Sheet: replicates
Session	UID	Sample name	Sample mass (in mg)	Calculated % carbonate	Sample pressure (in mbar)	Leak rate (in mbar)	Non condensable pressure (in mbar)	Residual pressure (in mbar)	Ratio mass 45 sample vs Working gas	Mass 47 signal (in V)	Bellow position (0 to 100)	d45 (in ‰)	d45 error (2 SE)	d46 (in ‰)	d46 error (2 SE)	d47 (in ‰)	d47 error (2 SE)	d48 (in ‰)	d48 error (2 SE)	d49 (in ‰)	d49 error (2 SE)	raw D47	raw D48	raw D49	D47 I-CDES	d13C (in ‰ VPDB)	d18O (in ‰ VPDB)	Flag	Use in pooled regression	Comments
PB-10_clumpedLIDI220240726_noKfactorcorrection	1	ETH-3	81	100	687	51	91	71	1.0388	27.0481	58	6.28906	0.00461478	11.9855	0.0120699	18.0058	0.0202995	25.899	0.199044	-24.7113	12.5212	-0.335819	1.74242	-53.624	0.479319	1.64305	-1.96843	YY	Considered as outlier	First sample of of the carousel is always spurious
PB-10_clumpedLIDI220240726_noKfactorcorrection	2	ETH-3	75	100	675	29	86	69	1.05175	24.7048	63	6.3064	0.00224081	12.1022	0.00450598	18.2738	0.0243584	24.0716	0.1511	-64.3708	5.28346	-0.203865	-0.272565	-92.3303	0.61088	1.65724	-1.85379	Y	Included
PB-10_clumpedLIDI220240726_noKfactorcorrection	3	ETH-3	75	100	670	256	84	69	1.02244	25.5978	59	6.34845	0.00199052	12.215	0.00351662	18.4208	0.0243371	26.3568	0.136507	-48.3521	5.09388	-0.212195	1.73504	-77.0335	0.60221	1.69789	-1.74309	Y	Included
PB-10_clumpedLIDI220240726_noKfactorcorrection	4	ETH-3	109	95	767	168	81	69	1.03294	42.4732	37	6.3538	0.00138647	12.1506	0.00571417	18.3127	0.0226709	25.1239	0.102538	-29.7221	3.82124	-0.261227	0.65905	-58.8527	0.553343	1.70595	-1.80636	Y	Considered as outlier	Outlier sensu peirce for raw D47.
PB-10_clumpedLIDI220240726_noKfactorcorrection	5	ETH-1	86	100	692	227	84	67	1.03453	29.0831	51	6.63407	0.00257485	11.6468	0.00447899	17.7454	0.0287309	47.2543	0.554015	-77.7358	7.01003	-0.61605	23.2797	-104.815	0.199237	2.02291	-2.30195	Y	Included
PB-10_clumpedLIDI220240726_noKfactorcorrection	6	ETH-2	102	100	736	198	81	67	1.03768	35.6837	42	-5.39588	0.00223611	-5.06649	0.00279579	-11.2003	0.0214523	-6.53577	0.626906	5.94363	7.39119	-0.687504	3.60796	21.91	0.192093	-10.1744	-18.6945		Included
PB-10_clumpedLIDI220240726_noKfactorcorrection	7	ETH-3	105	100	753	190	84	67	1.03878	40.1246	37	6.36431	0.0021821	12.1706	0.00313802	18.3424	0.0196898	29.6182	0.197316	-67.6428	5.27192	-0.262303	5.00634	-95.68	0.552199	1.7164	-1.78673		Considered as outlier	Outlier sensu peirce for raw D47.
PB-10_clumpedLIDI220240726_noKfactorcorrection	9	BTCARB05	162	61	733	212	84	69	1.03828	34.8047	46	-1.7049	0.00211594	8.15463	0.00366964	5.99764	0.0214249	19.2902	0.129459	-58.0309	5.58473	-0.244256	2.86749	-71.2567	0.597749	-6.73026	-5.71408		Included
PB-10_clumpedLIDI220240726_noKfactorcorrection	10	ETH-3	81	100	704	161	84	69	1.03904	30.3074	51	6.37007	0.00218816	12.1866	0.00274632	18.43	0.0264513	26.7136	0.11092	-75.6651	7.48301	-0.197769	2.13941	-103.494	0.616637	1.72196	-1.77099		Included
PB-10_clumpedLIDI220240726_noKfactorcorrection	11	IAEA-603	95	100	723	212	81	69	1.03768	32.9211	47	7.0428	0.00250539	11.567	0.00320421	18.2133	0.0234619	24.6802	0.114642	-99.4727	6.37371	-0.497821	1.3803	-126.156	0.316606	2.46114	-2.38119		Included
PB-10_clumpedLIDI220240726_noKfactorcorrection	12	18CIC10	117	85	741	161	84	69	1.03809	35.3336	43	-0.848626	0.00149918	8.00347	0.00281569	6.73556	0.0182485	22.2899	0.161176	-58.9725	4.30307	-0.24825	6.12049	-72.7596	0.592105	-5.81276	-5.86449		Included
PB-10_clumpedLIDI220240726_noKfactorcorrection	13	18CIC11	144	65	697	212	86	67	1.03664	29.0862	51	-1.89911	0.00193793	7.29254	0.00352479	4.93858	0.0249429	17.8262	0.137297	-178.078	6.87598	-0.255783	3.14192	-188.086	0.588561	-6.90545	-6.56058		Included
PB-10_clumpedLIDI220240726_noKfactorcorrection	14	ETH-1	117	100	770	161	81	67	1.03149	43.9051	35	6.64513	0.00129556	11.7438	0.00241362	17.8358	0.018786	138.143	0.860749	-301.743	5.69543	-0.632856	111.874	-322.38	0.182203	2.03113	-2.20669		Included
PB-10_clumpedLIDI220240726_noKfactorcorrection	15	ETH-2	118	100	772	220	79	67	1.03713	43.5208	34	-5.38447	0.00152274	-5.05647	0.00318303	-11.1905	0.0165977	4.90464	0.135177	-118.389	7.19868	-0.699341	15.1447	-104.424	0.180217	-10.1626	-18.6846		Included
PB-10_clumpedLIDI220240726_noKfactorcorrection	17	BTCARB05	159	61	721	220	84	67	1.03873	33.1451	48	-1.72494	0.00192667	8.1468	0.00414922	5.94189	0.02364	21.4	0.102578	-175.261	6.67698	-0.271312	4.95892	-186.81	0.570775	-6.75132	-5.72174		Included
PB-10_clumpedLIDI220240726_noKfactorcorrection	18	ETH-3	95	100	726	168	84	69	1.02954	32.4753	48	6.35682	0.00190746	12.2057	0.00400357	18.4408	0.0253125	28.3231	0.117693	-182.09	4.97425	-0.192109	3.67265	-206.734	0.622282	1.70714	-1.75225		Included
PB-10_clumpedLIDI220240726_noKfactorcorrection	19	POL2	90	100	701	220	84	69	1.06038	29.4383	53	-2.35737	0.00232304	4.51585	0.00505937	1.8051	0.0231902	11.9717	0.149765	-157.373	6.20022	-0.191216	2.89339	-162.697	0.6602	-7.29147	-9.28741		Included
PB-10_clumpedLIDI220240726_noKfactorcorrection	20	18CIC10	206	46	714	198	84	69	1.03749	31.2787	49	-0.860313	0.00184804	8.01208	0.00391531	6.70531	0.0250628	18.9088	0.167639	-146.436	6.54569	-0.274618	2.77578	-158.945	0.565764	-5.82552	-5.85601		Included
PB-10_clumpedLIDI220240726_noKfactorcorrection	21	18CIC11	131	70	682	300	428	69	1.05552	26.7704	56	-1.9361	0.00238092	7.30281	0.00469688	4.89006	0.022031	16.237	0.17372	-167.147	6.75647	-0.275847	1.55526	-177.273	0.568574	-6.94522	-6.55041	Y	Included	Non Condensable Pressure above 150 microbar.
PB-10_clumpedLIDI220240726_noKfactorcorrection	22	ETH-1	85	100	694	161	84	69	1.03628	28.5794	51	6.62806	0.00199816	11.7273	0.0041826	17.8655	0.0244729	51.0838	0.240233	-239.633	5.47792	-0.570174	26.8581	-262.069	0.244916	2.01355	-2.22283		Included
PB-10_clumpedLIDI220240726_noKfactorcorrection	23	ETH-4	99	100	743	256	84	69	1.03801	35.4178	41	-5.4311	0.00160162	-5.15907	0.00345058	-11.0424	0.0179144	-3.17501	0.112751	-149.445	4.76993	-0.400009	7.19045	-135.754	0.47968	-10.2085	-18.7853		Included
PB-10_clumpedLIDI220240726_noKfactorcorrection	24	BTCARB05	184	56	763	154	81	69	1.03566	39.7083	37	-1.70051	0.0017278	8.17529	0.00390665	5.96133	0.0219146	20.1273	0.100667	-197.505	3.84477	-0.305011	3.64997	-208.808	0.536981	-6.72635	-5.6938		Included
PB-10_clumpedLIDI220240726_noKfactorcorrection	26	ETH-3	120	100	789	198	86	69	1.03923	44.2413	37	6.36921	0.00157659	12.2929	0.00452183	18.5319	0.0233444	28.2549	0.173556	-194.107	5.50521	-0.200036	3.43313	-218.531	0.614141	1.71715	-1.66662		Included
PB-10_clumpedLIDI220240726_noKfactorcorrection	27	IAEA-603	100	100	753	234	86	69	1.04074	38.5061	41	7.03771	0.00213642	11.5827	0.00429506	18.2221	0.0208255	26.2298	0.14664	-187.595	5.60484	-0.499207	2.86352	-211.687	0.315198	2.45514	-2.36574		Included
PB-10_clumpedLIDI220240726_noKfactorcorrection	28	18CIC11	158	64	750	220	84	69	1.0214	36.9484	41	-1.83629	0.00172997	7.38893	0.00365225	5.0667	0.0185434	17.4457	0.124739	-207.999	6.29087	-0.287309	2.57504	-217.843	0.556701	-6.84209	-6.46603		Included
PB-10_clumpedLIDI220240726_noKfactorcorrection	29	18CIC10	214	46	731	249	86	69	1.03814	33.5841	44	-0.831683	0.00163558	7.98789	0.00407017	6.74976	0.0198946	18.7253	0.145097	-237.623	5.07808	-0.236453	2.64331	-248.783	0.603889	-5.79414	-5.87984		Included
PB-10_clumpedLIDI220240726_noKfactorcorrection	30	ETH-2	112	100	760	154	84	69	1.0363	38.4562	38	-5.39256	0.00124617	-5.02575	0.00336543	-11.1197	0.0224263	-6.01262	0.188753	-161.359	6.17375	-0.649713	4.05422	-148.119	0.229763	-10.1724	-18.6544		Included
PB-10_clumpedLIDI220240726_noKfactorcorrection	31	POL2	90	100	689	505	933	71	1.03518	27.4594	51	-2.30916	0.00201583	4.49808	0.00421636	1.87856	0.0237494	12.0265	0.173419	-257.055	5.66539	-0.150362	2.98324	-261.761	0.700954	-7.23947	-9.30498	YY	Included	leak rate above 500 microbar/min.Non Condensable Pressure above 150 microbar.
PB-10_clumpedLIDI220240726_noKfactorcorrection	32	BTCARB05	174	58	753	220	84	69	1.03272	38.201	37	-1.71893	0.0014568	8.18707	0.00306609	5.99513	0.0226113	17.793	0.102527	-255.076	4.2671	-0.263881	1.32995	-265.571	0.578099	-6.7464	-5.68218		Included
PB-10_clumpedLIDI220240726_noKfactorcorrection	34	ETH-3	95	100	733	154	86	69	1.03737	33.0469	48	6.40098	0.00204079	12.3083	0.00441994	18.5805	0.0213203	27.899	0.132699	-291.424	6.12736	-0.199867	3.05532	-312.942	0.614202	1.75042	-1.65154		Included
PB-10_clumpedLIDI220240726_noKfactorcorrection	35	ETH-4	77	100	672	227	84	69	1.03769	25.3909	59	-5.24278	0.0021641	-4.92398	0.00348018	-10.6433	0.0238282	-5.7635	0.141686	-308.049	6.27152	-0.424194	4.10044	-297.379	0.454569	-10.0166	-18.5548		Included
PB-10_clumpedLIDI220240726_noKfactorcorrection	36	18CIC11	158	63	738	212	81	69	1.03899	35.4273	43	-1.90969	0.00170369	7.27785	0.0026468	4.85461	0.0200106	17.5783	0.194915	-275.9	5.50785	-0.314064	2.92684	-284.689	0.530377	-6.91618	-6.57499		Included
PB-11_clumpedLIDI220241204	1	ETH-3	83	94	863	37	128	108	1.03847	19.7675	60	6.43256	0.00340555	12.3669	0.00620793	18.5963	0.0297334	26.9187	0.118581	46.1113	7.87395	-0.273663	1.98257	14.1934	0.523468	1.74731	-1.67669	Y	Considered as outlier	First sample of of the carousel is always spurious
PB-11_clumpedLIDI220241204	2	ETH-3	108	80	951	110	132	108	1.03877	27.0214	44	6.40447	0.00213202	12.2504	0.0040715	18.5413	0.0250849	24.2943	0.166198	-15.1029	2.84269	-0.185708	-0.348072	-44.9088	0.610866	1.72153	-1.79164	Y	Considered as outlier	Poor room temperature control during the beginning of the run.
PB-11_clumpedLIDI220241204	3	ETH-3	110	79	953	161	130	108	1.03145	27.6006	42	6.38982	0.00168682	12.2521	0.00376627	18.5659	0.0246009	24.7767	0.157669	-17.5885	3.52848	-0.148134	0.119561	-47.3073	0.647927	1.70578	-1.79	Y	Considered as outlier	Poor room temperature control during the beginning of the run.
PB-11_clumpedLIDI220241204	4	ETH-3	99	84	916	190	125	106	1.03995	24.3768	47	6.3842	0.00191184	12.2855	0.00389078	18.5908	0.0291919	24.666	0.131371	-14.8993	5.92552	-0.150415	-0.054539	-44.7558	0.645527	1.69854	-1.75696	Y	Considered as outlier	Poor room temperature control during the beginning of the run.
PB-11_clumpedLIDI220241204	5	ETH-3	105	81	936	168	125	106	1.04048	26.6659	43	6.40946	0.00190217	12.2759	0.00361808	18.5806	0.0255208	24.6437	0.134315	-25.6541	5.03762	-0.176937	-0.057382	-55.1923	0.619326	1.72594	-1.76651	Y	Considered as outlier	Poor room temperature control during the beginning of the run.
PB-11_clumpedLIDI220241204	6	ETH-1	11	100	963	190	125	106	1.03752	29.5876	38	6.62491	0.00150563	11.7971	0.00378991	17.9031	0.0266475	27.6323	0.106672	-26.3377	5.03008	-0.597854	3.80847	-55.1925	0.206444	1.97418	-2.23963		Included
PB-11_clumpedLIDI220241204	7	ETH-2	81	100	865	154	128	106	1.03623	19.1555	55	-5.33704	0.00192681	-4.94621	0.00384821	-11.0935	0.0252841	-8.89474	0.136201	-1.8366	7.82164	-0.759353	0.98287	13.7015	0.212173	-10.2106	-18.7419		Included
PB-11_clumpedLIDI220241204	8	ETH-3	110	78	951	147	125	106	1.03578	27.9615	39	6.43716	0.00178571	12.374	0.00397351	18.6775	0.0235646	25.0631	0.172472	-24.3279	4.94044	-0.205506	0.158084	-54.1143	0.590486	1.75197	-1.66971	Y	Included
PB-11_clumpedLIDI220241204	9	ETH-4	80	100	841	154	128	106	1.03588	17.3715	66	-5.4239	0.00225265	-5.1379	0.00370363	-11.0448	0.0273701	-9.51466	0.101602	-27.281	7.02235	-0.430861	0.742287	-11.6729	0.537137	-10.2965	-18.9309		Included
PB-11_clumpedLIDI220241204	10	BTCARB15	185	49	1004	198	132	108	1.03099	34.3895	35	-2.02987	0.00194483	8.10544	0.00326939	5.44351	0.0243996	16.881	0.142425	5.22971	3.24767								Rejected	Software or hardware error during the acquisition and/or non steady signal through the acquisition process
PB-11_clumpedLIDI220241204	11	BTCARB17	139	57	877	154	130	108	1.03721	20.0098	57	-1.46629	0.00192682	7.87711	0.00380202	5.9695	0.0243949	15.6648	0.135582	-34.7465	6.89479	-0.248174	-0.149081	-48.0267	0.62083	-6.54202	-6.09137		Included
PB-11_clumpedLIDI220241204	12	BTCARB18	189	44	929	168	128	108	1.03947	24.2646	47	-1.6272	0.00194557	8.32943	0.00398336	6.22852	0.0241003	17.6632	0.153137	-37.4614	6.30032	-0.265516	0.91959	-51.3779	0.602179	-6.73094	-5.64447		Included
PB-11_clumpedLIDI220241204	13	IAEA-603	85	100	889	176	132	111	1.06994	21.0802	54	7.08376	0.00203611	11.6986	0.00439919	18.4169	0.0282444	23.4461	0.11791	-56.1187	6.79058	-0.467726	-0.085844	-84.3605	0.33235	2.46896	-2.33793		Included
PB-11_clumpedLIDI220241204	14	ETH-1	85	100	897	183	130	111	1.02155	21.4066	51	6.65372	0.00206148	11.7846	0.00476169	17.9295	0.02588	36.0775	0.14471	-65.684	5.95785	-0.589333	12.083	-93.3784	0.214731	2.00548	-2.25205		Included
PB-11_clumpedLIDI220241204	15	VIA1	82	97	877	176	132	111	1.05714	19.5755	56	-2.44823	0.0019417	6.94949	0.00401439	4.06687	0.0278706	15.0574	0.131639	-49.0758	6.60719	-0.220909	1.09481	-59.4747	0.658692	-7.55883	-7.00491		Included
PB-11_clumpedLIDI220241204	16	BTCARB15	153	58	982	147	130	113	1.03387	29.6405	37	-2.09699	0.00146687	8.06562	0.00359709	5.43138	0.0214533	16.9505	0.142393	-25.481	3.72182	-0.315131	0.742172	-38.5946	0.557609	-7.22406	-5.90386		Included
PB-11_clumpedLIDI220241204	17	BTCARB17	132	59	865	190	132	111	1.03817	18.4572	64	-1.45391	0.00213382	7.88909	0.00529733	5.9767	0.0302921	16.3896	0.15476	-41.582	5.4176	-0.265486	0.540572	-54.8028	0.603648	-6.52921	-6.07956		Included
PB-11_clumpedLIDI220241204	18	BTCARB18	178	47	929	110	132	113	1.03792	23.4706	50	-1.63239	0.0015905	8.4108	0.00414265	6.28655	0.0242684	17.0944	0.13272	-45.0655	5.03515	-0.281805	0.1987	-59.0161	0.58572	-6.7395	-5.56413		Included
PB-11_clumpedLIDI220241204	19	ETH-2	96	89	941	190	135	113	1.02396	24.1759	47	-5.1734	0.00174014	-4.73304	0.00365511	-10.7507	0.0229089	-8.71562	0.115662	-18.4742	5.65108	-0.79313	0.734946	-3.7892	0.176774	-10.0434	-18.5318	Y	Included
PB-11_clumpedLIDI220241204	20	IAEA-603	105	100	965	168	154	113	1.01615	26.5449	43	7.06239	0.00198652	11.7352	0.00436837	18.4264	0.028137	23.7581	0.125975	-40.3312	5.10356	-0.472056	0.146577	-69.0904	0.328008	2.44474	-2.30177	Y	Included	Non Condensable Pressure above 150 microbar.
PB-11_clumpedLIDI220241204	21	VIA1	92	90	916	183	135	111	1.03778	22.6193	50	-2.43464	0.00189648	7.03632	0.00410699	4.15234	0.0240078	15.2636	0.151848	-34.3721	6.89655	-0.234608	1.12549	-45.1074	0.64464	-7.54749	-6.91923		Included
PB-11_clumpedLIDI220241204	22	ETH-3	90	100	894	161	128	111	1.04555	21.7307	51	6.38977	0.00204413	12.2773	0.00402932	18.5446	0.0306463	24.4986	0.118521	-66.5241	7.39084	-0.193497	-0.201754	-94.8069	0.603136	1.70481	-1.76507		Included
PB-11_clumpedLIDI220241204	23	BTCARB15	168	50	933	168	135	111	1.03592	24.1487	45	-2.10291	0.0016897	8.00459	0.00413765	5.36762	0.0261893	16.4517	0.104507	-38.8249	5.52211	-0.312902	0.372384	-51.64	0.56018	-7.22815	-5.96409		Included
PB-11_clumpedLIDI220241204	24	BTCARB17	149	56	919	161	130	111	1.04903	22.708	48	-1.45952	0.00184395	7.94188	0.00387114	6.03378	0.0230227	16.1602	0.118203	-40.623	6.03032	-0.254439	0.210041	-53.9487	0.614259	-6.53716	-6.02744		Included
PB-11_clumpedLIDI220241204	25	BTCARB18	186	46	938	176	135	108	1.04002	25.542	47	-1.61783	0.00157986	8.45968	0.00409161	6.28373	0.0260513	17.6363	0.134179	-34.952	4.87728	-0.347291	0.634601	-49.1556	0.520899	-6.72572	-5.51591		Included
PB-11_clumpedLIDI220241204	26	ETH-2	70	100	824	147	130	108	1.03704	16.2242	70	-5.3329	0.00149919	-4.85264	0.00377624	-10.9366	0.0281177	-9.54967	0.139166	-55.9678	8.69824	-0.697478	0.133295	-41.4537	0.27254	-10.2096	-18.6495		Considered as outlier	Outlier sensu peirce for raw D47.
PB-11_clumpedLIDI220241204	27	ETH-1	86	100	882	176	130	106	1.03951	21.6717	54	6.68775	0.0021273	11.799	0.00356335	17.9484	0.025379	32.7647	0.150342	-93.5356	6.40011								Rejected	Software or hardware error during the acquisition and/or non steady signal through the acquisition process
PB-11_clumpedLIDI220241204	28	ETH-3	78	100	821	190	123	103	1.07711	17.5636	67	6.40935	0.00242869	12.3049	0.00490342	18.5868	0.0292396	25.6884	0.144934	-128.964	8.87581	-0.198926	0.904898	-155.418	0.597519	1.72475	-1.73791		Included
PB-11_clumpedLIDI220241204	29	BTCARB18	189	44	929	447	128	106	1.03671	25.9427	44	-1.57083	0.00189359	8.47704	0.00433632	6.2692	0.0256465	17.8538	0.145689	-49.0854	4.24075								Rejected	Software or hardware error during the acquisition and/or non steady signal through the acquisition process
PB-11_clumpedLIDI220241204	30	BTCARB17	139	57	880	147	125	103	1.03669	21.2597	52	-1.44678	0.0020096	7.97761	0.00409879	6.02407	0.0272924	16.2044	0.107009	-57.1492	8.90018								Rejected	Software or hardware error during the acquisition and/or non steady signal through the acquisition process
PB-11_clumpedLIDI220241204	31	BTCARB15	172	52	995	212	120	106	1.03218	35.2596	32	-2.10724	0.00149887	8.08204	0.00285368	5.38082	0.0207037	17.359	0.145003	-34.6359	3.52466	-0.370818	1.11153	-47.6463	0.502761	-7.23564	-5.88762		Included
PB-11_clumpedLIDI220241204	32	ETH-1	87	92	882	161	130	106	1.0334	21.418	50	6.67682	0.0023394	11.8438	0.00513326	18.0281	0.0236453	30.2979	0.12062	-86.1694	10.0926	-0.573692	6.31947	-113.38	0.229653	2.02802	-2.19366	Y	Included
PB-11_clumpedLIDI220241204	33	IAEA-603	100	100	919	227	130	106	1.03973	25.2829	48	7.09674	0.00165788	11.6843	0.00405899	18.321	0.0253644	24.4511	0.120829	-71.514	7.62287								Rejected	Poor room temperature control during the end of the run.
PB-11_clumpedLIDI220241204	34	ETH-3	84	100	858	176	130	106	1.03716	19.2533	60	6.40259	0.00180913	12.3343	0.00411222	18.533	0.0308417	24.814	0.124059	-99.0113	7.38605								Rejected	Poor room temperature control during the end of the run.
PB-11_clumpedLIDI220241204	35	BTCARB18	192	44	936	205	132	106	1.03769	25.9527	45	-1.59125	0.00134945	8.4335	0.00463224	6.25446	0.0247736	17.5076	0.141714	-49.2396	6.5175								Rejected	Poor room temperature control during the end of the run.
PB-11_clumpedLIDI220241204	36	BTCARB17	142	57	889	147	128	108	1.03728	21.4772	52	-1.46854	0.00184171	7.97561	0.00509297	5.92961	0.0314539	16.2287	0.147734	-53.2383	6.71015								Rejected	Poor room temperature control during the end of the run.
PB-11_clumpedLIDI220241204	37	BTCARB15	157	57	985	249	318	108	1.03651	31.6056	36	-2.09566	0.00154464	8.05972	0.00357608	5.36339	0.0202971	17.1101	0.130613	-38.4343	6.04713							Y	Rejected	Non Condensable Pressure above 150 microbar. Poor room temperature control during the end of the run.
PB-11_clumpedLIDI220241204	38	ETH-2	82	100	877	161	128	106	1.03799	19.8588	54	-5.3374	0.00193384	-4.88087	0.0040882	-11.0771	0.0277374	-9.49661	0.11373	-26.6981	9.39349	-0.806922	0.243632	-11.6741	0.164981	-10.2134	-18.6774		Included	Poor room temperature control during the end of the run.
PB-11_clumpedLIDI220241204	39	VIA1	77	98	833	271	352	106	1.06388	17.1029	63	-2.44154	0.0021736	6.94083	0.0050679	3.97969	0.0246076	13.7722	0.143921	-73.4047	8.32387							Y	Rejected	Poor room temperature control during the end of the run.
PB-11_clumpedLIDI220241204	40	ETH-4	70	100	811	154	125	106	1.04396	15.3745	67	-5.37305	0.00222208	-5.00178	0.00412274	-10.993	0.0332719	-9.69025	0.119994	-62.7753	8.70196	-0.565654	0.291153	-48.0446	0.403382	-10.2471	-18.7967		Considered as outlier	Outlier sensu peirce for raw D47. Poor room temperature control during the end of the run.
PB-11_clumpedLIDI220241204	41	BTCARB18	175	47	916	432	1002	111	1.03933	23.4719	51	-1.64336	0.00203235	8.3483	0.0044936	6.1203	0.0232169	17.3419	0.131092	-36.9246	6.56514							Y	Rejected	Non Condensable Pressure above 150 microbar. Poor room temperature control during the end of the run.
PB-11_clumpedLIDI220241204	42	BTCARB17	134	59	870	256	433	108	1.03825	19.4048	59	-1.43968	0.00276805	7.93837	0.00491093	5.96967	0.0241655	15.6234	0.138624	-49.3184	6.8962							Y	Rejected	Non Condensable Pressure above 150 microbar. Poor room temperature control during the end of the run.
PB-11_clumpedLIDI220241204	43	BTCARB15	152	58	975	176	132	108	1.03764	29.8708	40	-2.08547	0.00193499	8.03334	0.00442114	5.37595	0.0226854	16.6735	0.128046	-23.5581	5.76009								Rejected	Poor room temperature control during the end of the run.
PB-11_clumpedLIDI220241204	44	ETH-1	97	100	921	132	135	111	1.03881	23.9909	48	6.67629	0.0015701	11.7942	0.00395615	17.9397	0.024675	27.4499	0.143982	-45.4139	6.42537								Rejected	Poor room temperature control during the end of the run.
PB-11_clumpedLIDI220241204	45	ETH-2	80	100	855	212	128	108	1.03675	17.9709	60	-5.33897	0.00207152	-4.96849	0.00449818	-11.1289	0.0264057	-9.37004	0.12414	-30.7112	6.97502	-0.771123	0.547623	-15.5772	0.200722	-10.2118	-18.7639		Included	Poor room temperature control during the end of the run.
PB-11_clumpedLIDI220241204	46	ETH-3	73	100	809	190	130	108	1.06342	15.5266	71	6.38428	0.00252067	12.3419	0.00492231	18.6069	0.0362441	24.5223	0.130168	-83.2461	7.14	-0.189435	-0.306118	-111.129	0.606802	1.69656	-1.70132		Considered as outlier	Outlier sensu peirce for raw D47. Poor room temperature control during the end of the run.
PB-12_clumpedLIDI220241206	1	ETH-3	98	94	877	37	123	103	1.038	24.6642	49	6.51174	0.0117155	12.5266	0.0189636	18.8758	0.0574011	28.9448	0.340253	123.532	26.2292	-0.235427	3.64292	88.8228	0.582596	1.81112	-1.54374	YY	Included	First sample of of the carousel is always spurious
PB-12_clumpedLIDI220241206	2	ETH-3	99	92	870	88	125	98	1.04658	24.4588	49	6.37279	0.00218605	12.2642	0.00487782	18.4824	0.0291986	25.1176	0.132141	-6.90182	6.60035	-0.224442	0.428297	-36.9493	0.597363	1.67248	-1.80186	Y	Included
PB-12_clumpedLIDI220241206	3	ETH-3	100	91	868	220	120	98	1.03175	24.8462	47	6.41247	0.00197868	12.2933	0.00457406	18.5036	0.0270794	25.4402	0.129943	5.04493	8.81596	-0.272501	0.685564	-25.46	0.543721	1.71375	-1.77328	Y	Considered as outlier	Outlier sensu peirce for raw D47.
PB-12_clumpedLIDI220241206	4	ETH-3	108	87	894	198	118	98	1.03834	27.6163	42	6.3921	0.0017892	12.3365	0.00386209	18.4649	0.027745	25.397	0.11694	-10.2185	7.18328							Y	Rejected	Software or hardware error during the acquisition and/or non steady signal through the acquisition process
PB-12_clumpedLIDI220241206	5	ETH-3	94	96	863	205	120	101	1.04524	23.5588	48	6.40249	0.00188794	12.3334	0.00501312	18.5457	0.0240941	25.5567	0.158123	47.2223	9.23096	-0.259985	0.719928	15.3689	0.557384	1.70163	-1.73374	Y	Included
PB-12_clumpedLIDI220241206	6	ETH-1	102	100	902	154	118	101	1.0424	27.0479	41	6.68604	0.0018586	11.839	0.00537008	17.9977	0.028474	26.2569	0.145938	0.0722319	10.5411	-0.608262	2.38208	-29.707	0.173175	2.02234	-2.22142		Included
PB-12_clumpedLIDI220241206	7	ETH-2	82	100	804	183	123	101	1.03671	18.0158	58	-5.34419	0.00224792	-4.95094	0.00390592	-11.0873	0.023789	-8.86075	0.0961741	30.4736	13.1561	-0.74108	1.02672	46.5325	0.212893	-10.1952	-18.7328		Included
PB-12_clumpedLIDI220241206	8	ETH-3	84	100	831	183	118	101	1.00573	20.6463	50	6.39145	0.00210099	12.2973	0.00355814	18.534	0.0326318	25.1495	0.129192	-24.0855	11.5242	-0.225011	0.394054	-53.6925	0.596397	1.69119	-1.76933		Included
PB-12_clumpedLIDI220241206	9	ETH-4	103	100	897	212	123	101	1.04035	26.0681	45	-5.3769	0.00171237	-5.08119	0.00440293	-11.0643	0.0256049	-8.57656	0.124938	38.1311	8.96463	-0.555221	1.57593	54.6175	0.419665	-10.2253	-18.861		Included
PB-12_clumpedLIDI220241206	10	18CIC10	205	43	846	147	125	101	1.03976	21.3231	54	-0.797925	0.00179617	8.1186	0.00568953	6.84739	0.0282254	16.5288	0.15245	-7.0877	10.8883	-0.30179	0.222076	-21.9073	0.586291	-5.82646	-5.8693		Included
PB-12_clumpedLIDI220241206	11	18CIC11	150	62	882	198	123	103	1.03898	24.28	47	-1.88623	0.00166325	7.38477	0.00408822	4.96894	0.0250965	15.4897	0.115865	-11.9721	7.89137	-0.328876	0.655883	-24.1923	0.568252	-6.96071	-6.5897		Included
PB-12_clumpedLIDI220241206	12	18CIC09	139	61	806	190	120	101	1.03633	17.9234	62	-1.64728	0.00196068	7.90327	0.00485584	5.75341	0.0258464	15.8725	0.126192	-24.2977	9.43976	-0.301469	0.003458	-37.5848	0.593704	-6.72482	-6.0795		Included
PB-12_clumpedLIDI220241206	13	IAEA-603	103	100	902	374	760	103	1.03856	26.474	43	7.06682	0.00162785	11.6796	0.00439234	18.3703	0.0270686	23.7814	0.150269	-21.0694	6.17027	-0.477608	0.279189	-50.3079	0.316231	2.43448	-2.37921	Y	Included	Non Condensable Pressure above 150 microbar.
PB-12_clumpedLIDI220241206	14	ETH-1	97	100	882	161	120	103	1.0544	24.3191	46	6.68079	0.00208173	11.809	0.00381976	18.0343	0.026211	30.8982	0.133483	-32.5702	7.40681	-0.537836	6.97504	-61.3176	0.251345	2.01783	-2.25088		Included
PB-12_clumpedLIDI220241206	15	VIA1	80	100	821	190	125	101	1.03805	18.5203	57	-2.43475	0.00194341	6.9624	0.00467612	4.06207	0.0306331	14.8338	0.123862	-33.4774	9.44818	-0.252219	0.84863	-44.0847	0.659444	-7.53045	-7.00452		Included
PB-12_clumpedLIDI220241206	16	18CIC10	204	45	875	190	123	103	1.03536	23.0656	46	-0.789862	0.00357385	8.08505	0.010769	-0.769354	0.950437	-17.1222	4.13066	-1225.29	303.652								Rejected	Software or hardware error during the acquisition and/or non steady signal through the acquisition process
PB-12_clumpedLIDI220241206	17	18CIC11	142	65	877	198	125	103	1.04101	23.0847	51	-1.88759	0.0020043	7.39605	0.00646889	2.64064	0.302422	4.80442	1.30025	-2085.96	2182.7								Rejected	Software or hardware error during the acquisition and/or non steady signal through the acquisition process
PB-12_clumpedLIDI220241206	18	18CIC09	137	61	792	161	120	103	1.03658	16.4146	69	-1.62083	0.00241101	7.88348	0.00571319	5.78405	0.0296347	15.5243	0.16231	-37.182	10.669	-0.27904	-0.30009	-50.2839	0.618478	-6.69586	-6.09906		Included
PB-12_clumpedLIDI220241206	19	ETH-2	95	100	892	198	120	103	1.03561	24.0204	48	-5.28293	0.00168319	-4.89218	0.00439919	-10.9604	0.0258918	-9.22339	0.160278	18.5287	5.23058	-0.734317	0.542288	34.2135	0.219604	-10.132	-18.6751		Included
PB-12_clumpedLIDI220241206	20	IAEA-603	80	100	836	176	123	103	1.03918	19.5923	57	7.08062	0.00225222	11.6918	0.00444151	18.4042	0.0304008	23.1525	0.133719	-43.6858	8.84692	-0.470259	-0.359224	-72.2842	0.324194	2.44877	-2.36728		Included
PB-12_clumpedLIDI220241206	21	VIA1	80	100	826	190	128	103	1.04279	18.4728	60	-2.45614	0.00205717	6.95336	0.00506042	4.03148	0.0331368	13.8206	0.131791	-34.719	8.49737	-0.251753	-0.132706	-45.274	0.66016	-7.55293	-7.01337		Included
PB-12_clumpedLIDI220241206	22	ETH-3	83	100	841	154	123	103	1.0202	19.7891	55	6.41896	0.0016349	12.3102	0.00474898	18.6281	0.0269366	24.6157	0.121665	-45.7605	7.93817	-0.173351	-0.152352	-74.76	0.653304	1.72007	-1.75667		Included
PB-12_clumpedLIDI220241206	23	18CIC10	199	46	868	425	902	106	1.01073	21.6995	49	-0.812363	0.00174607	8.02003	0.00463973	6.75849	0.0277306	16.1542	0.162125	-24.5269	6.63837	-0.279059	0.049003	-38.8868	0.612172	-5.83824	-5.96636	Y	Included	Non Condensable Pressure above 150 microbar.
PB-12_clumpedLIDI220241206	24	18CIC11	133	67	853	147	125	106	1.05449	20.3573	53	-1.86341	0.0019802	7.43394	0.00482662	5.03539	0.028046	14.9273	0.14304	-29.8706	7.67855	-0.334346	0.004095	-41.9847	0.561733	-6.93817	-6.54132		Included
PB-12_clumpedLIDI220241206	25	18CIC09	151	59	853	190	125	103	1.03875	20.4137	58	-1.61831	0.00178171	7.80122	0.00488944	5.68494	0.0253203	15.9394	0.131708	-22.9509	6.64552	-0.299933	0.27187	-36.0945	0.595856	-6.69016	-6.18009		Included
PB-12_clumpedLIDI220241206	26	ETH-2	70	100	907	161	130	106	1.0384	24.6025	47	-5.31573	0.00172068	-4.86336	0.00353033	-10.9879	0.0256134	-9.31945	0.144507	8.59338	5.44519	-0.75655	0.387317	24.1029	0.195029	-10.1681	-18.6466		Included
PB-12_clumpedLIDI220241206	27	ETH-1	93	100	875	183	128	106	1.06267	22.2941	53	6.68935	0.00173752	11.8074	0.00452332	17.9799	0.0292771	29.8151	0.137767	-35.8645	6.49964	-0.598361	5.92038	-64.5195	0.184312	2.02703	-2.25255		Included
PB-12_clumpedLIDI220241206	28	ETH-3	85	100	850	161	130	106	1.05387	20.0761	57	6.4203	0.00210753	12.294	0.00430247	18.5839	0.0305038	24.9342	0.117845	-38.7659	6.29446	-0.202492	0.190295	-67.9502	0.621146	1.72209	-1.77256		Included
PB-12_clumpedLIDI220241206	29	18CIC09	147	59	828	300	540	108	1.05291	17.8527	62	-1.6039	0.0018297	7.8323	0.0047623	5.74226	0.0289509	15.4669	0.131159	-31.2017	7.73342	-0.288163	-0.255076	-44.3069	0.60859	-6.67592	-6.14951	Y	Included	Non Condensable Pressure above 150 microbar.
PB-12_clumpedLIDI220241206	30	18CIC11	128	70	858	212	132	106	1.00867	19.919	53	-1.86976	0.00242685	7.44343	0.00509347	5.0479	0.0282441	14.8642	0.141101	-22.5782	6.9925	-0.324594	-0.076925	-34.7946	0.572509	-6.94529	-6.53196		Included
PB-12_clumpedLIDI220241206	31	18CIC10	218	44	914	198	130	108	1.03633	25.0489	44	-0.78421	0.00172667	8.11207	0.00445845	6.82625	0.0259272	16.4284	0.141538	-9.68691	4.96746	-0.330587	0.13622	-24.4696	0.554367	-5.81159	-5.87575		Included
PB-12_clumpedLIDI220241206	32	ETH-1	82	100	833	220	125	106	1.03726	18.7056	57	6.66343	0.00224827	11.8311	0.00445679	18.0209	0.02818	62.0993	0.259141	-57.4068	6.62877	-0.554727	37.4068	-85.4386	0.232626	1.99851	-2.22909		Included
PB-12_clumpedLIDI220241206	33	IAEA-603	100	100	865	220	123	106	1.04214	21.5303	55	7.0802	0.00201363	11.6443	0.00480856	18.3576	0.0292046	25.6778	0.139647	-26.0623	6.43401	-0.469537	2.20199	-55.1002	0.325299	2.45006	-2.41402		Included
PB-12_clumpedLIDI220241206	34	ETH-3	110	100	921	168	130	106	1.03959	27.1691	44	6.39743	0.00166217	12.3278	0.00396992	18.5833	0.0275015	25.8427	0.12683	-38.2561	4.91895	-0.212431	1.01012	-67.4943	0.610085	1.69644	-1.73925		Included
PB-12_clumpedLIDI220241206	35	18CIC09	148	59	838	256	125	106	1.03841	19.5796	58	-1.61036	0.0019239	7.84793	0.00439097	5.73365	0.0254399	16.2448	0.143649	-11.2454	8.68687	-0.305288	0.479739	-24.6436	0.58958	-6.68339	-6.13409		Included
PB-12_clumpedLIDI220241206	36	18CIC11	155	61	907	161	123	103	1.03721	25.9436	44	-1.87051	0.00170372	7.45001	0.00418899	5.0677	0.0235939	16.5183	0.165506	-21.0454	7.07072	-0.310548	1.5397	-33.2926	0.58802	-6.94633	-6.52547		Included
PB-12_clumpedLIDI220241206	37	18CIC10	196	45	850	242	125	103	1.03745	20.6742	54	-0.775269	0.00187363	8.11164	0.00410204	6.88624	0.0285627	16.8307	0.0978217	-30.8027	10.487	-0.279832	0.532874	-45.2785	0.610487	-5.80203	-5.8762		Included
PB-12_clumpedLIDI220241206	38	ETH-2	106	100	911	161	123	103	1.04075	26.1128	42	-5.33137	0.00162504	-4.87263	0.00295207	-11.0194	0.0207325	-8.29724	0.129776	-2.15906	6.99372	-0.763007	1.4382	13.2207	0.188043	-10.1844	-18.6557		Included
PB-12_clumpedLIDI220241206	39	VIA1	81	100	828	234	125	103	1.03828	19.1208	56	-2.39139	0.00194177	6.98849	0.00396881	4.06855	0.026293	14.6776	0.132326	-21.3089	9.62892	-0.316074	0.642713	-32.1438	0.588311	-7.48514	-6.97892		Included
PB-12_clumpedLIDI220241206	40	ETH-4	91	100	863	190	123	103	1.03591	21.5626	49	-5.35631	0.00164872	-4.99558	0.00371955	-10.9202	0.025609	-8.99605	0.122896	19.1269	8.73494	-0.515577	0.979861	35.1136	0.462872	-10.2065	-18.7767		Included
PB-12_clumpedLIDI220241206	41	18CIC09	149	58	828	234	128	103	1.03706	19.1899	61	-1.59707	0.00211211	7.81653	0.00447336	5.6822	0.0254768	15.9793	0.12541	-2.80448	8.43705	-0.339535	0.280715	-16.2707	0.551784	-6.66806	-6.16506		Included
PB-12_clumpedLIDI220241206	42	18CIC11	139	66	872	183	123	103	1.03678	22.2436	52	-1.85587	0.00159509	7.46188	0.00417767	5.06063	0.0270279	15.1439	0.145464	-10.3111	8.6034	-0.344282	0.161953	-22.7305	0.550508	-6.93115	-6.51381		Included
PB-12_clumpedLIDI220241206	43	18CIC10	195	46	853	242	128	106	1.05747	20.0989	58	-0.772683	0.00193887	8.10874	0.00392522	6.84268	0.0277646	17.1513	0.129534	-21.9103	8.52952	-0.322922	0.854123	-36.5161	0.562795	-5.79917	-5.87906		Included
PB-12_clumpedLIDI220241206	44	ETH-1	96	100	909	205	125	106	1.03563	25.1754	46	6.65446	0.00170005	11.827	0.00407661	17.9707	0.0243066	35.8913	0.16432	-24.8721	6.33758	-0.590707	11.8164	-53.8548	0.192892	1.98908	-2.23317		Included
PB-13_clumpedLIDI-120241210unbrack	1	ETH-3	90	99	846	73	120	103	1.04128	21.3914	56	6.46895	0.00555023	12.396	0.00860512	18.5704	0.0291423	26.17	0.111723	78.7632	15.7369							Y	Rejected	First sample of of the carousel is always spurious
PB-13_clumpedLIDI-120241210unbrack	2	ETH-3	97	96	885	110	118	103	1.00972	23.2759	49	6.3895	0.00206979	12.2712	0.00457898	18.5009	0.0268809	24.527	0.150287	-10.5317	3.93571	-0.23017	-0.161866	-40.4993	0.607008	1.69323	-1.7682	Y	Considered as outlier	Outlier sensu peirce for raw D47.
PB-13_clumpedLIDI-120241210unbrack	3	ETH-3	97	96	885	205	125	106	1.03196	23.3675	49	6.38223	0.0017791	12.2684	0.00466841	18.5018	0.0242176	24.6431	0.155976	-4.52342	4.4943	-0.219141	-0.043143	-34.6604	0.618822	1.68558	-1.77087	Y	Included
PB-13_clumpedLIDI-120241210unbrack	4	ETH-3	90	100	860	161	123	106	1.06217	20.93	55	6.40282	0.00220546	12.311	0.00460932	18.569	0.0251944	24.4333	0.128028	-6.78593	4.55703	-0.215618	-0.331944	-36.955	0.622193	1.70596	-1.72908	Y	Included
PB-13_clumpedLIDI-120241210unbrack	5	ETH-3	95	97	875	212	128	106	1.01169	22.2112	49	6.40073	0.0019846	12.3073	0.00441285	18.6053	0.0268757	24.5471	0.135443	-9.60428	4.6138	-0.174256	-0.213566	-39.6787	0.666301	1.70387	-1.73273	Y	Included
PB-13_clumpedLIDI-120241210unbrack	6	ETH-1	95	100	899	132	123	106	1.01594	24.3059	45	6.67422	0.00203161	11.7947	0.0037864	17.9711	0.0259939	25.4598	0.136468	-9.77981	4.16027	-0.579261	1.69113	-39.1711	0.23609	2.01396	-2.23721		Considered as outlier	Outlier sensu peirce for raw D47.
PB-13_clumpedLIDI-120241210unbrack	7	ETH-2	90	100	882	190	128	106	1.06192	21.8909	50	-5.35235	0.00187328	-4.95807	0.00369842	-11.0852	0.0264935	-9.27245	0.154504	25.5994	4.94402	-0.723375	0.625235	41.606	0.256249	-10.1799	-18.6807		Included
PB-13_clumpedLIDI-120241210unbrack	8	ETH-3	106	100	924	154	120	106	1.0377	26.4398	41	6.417	0.00212489	12.3268	0.00469354	18.596	0.0238784	25.0547	0.161032	-11.0793	3.25176	-0.219045	0.243204	-41.1617	0.618359	1.72048	-1.71357		Included
PB-13_clumpedLIDI-120241210unbrack	9	ETH-4	94	100	897	168	128	106	1.03928	23.3076	50	-5.3951	0.00159502	-5.09071	0.00372317	-11.0679	0.0277129	-9.09951	0.13046	23.2651	5.89433	-0.530649	1.06677	39.5553	0.46268	-10.2206	-18.811		Included
PB-13_clumpedLIDI-120241210unbrack	10	BTCARB15	158	64	970	176	125	106	1.03824	31.8713	38	-2.08773	0.00148542	8.0408	0.00346285	5.40592	0.0240796	16.5546	0.140948	0.53911	3.41345	-0.325811	0.401844	-12.8865	0.583202	-7.18131	-5.90832		Included
PB-13_clumpedLIDI-120241210unbrack	11	18CIC10	216	42	875	205	132	106	1.03805	21.356	53	-0.764076	0.00196614	8.06324	0.0053132	6.76682	0.0270119	16.5351	0.16267	-3.18835	5.74115	-0.362769	0.338146	-17.9957	0.535419	-5.77221	-5.8892		Included
PB-13_clumpedLIDI-120241210unbrack	12	BTCARB18	169	54	880	154	128	108	1.06728	21.6899	53	-1.64655	0.00198848	8.38422	0.00554265	6.20387	0.0256188	16.8286	0.122892	-6.88673	6.17452	-0.323414	-0.009996	-21.3295	0.580977	-6.72399	-5.57167		Included
PB-13_clumpedLIDI-120241210unbrack	13	IAEA-603	0	100	951	234	132	108	1.03818	28.8136	40	7.08574	0.00215126	11.6728	0.00463283	18.3552	0.0274416	23.7903	0.116687	-15.1797	3.92059	-0.505261	0.301333	-44.6006	0.313084	2.45678	-2.35797		Included
PB-13_clumpedLIDI-120241210unbrack	14	ETH-1	109	100	955	161	128	108	1.02918	29.4051	38	6.68813	0.00173595	11.8196	0.00412829	17.9595	0.0212703	30.9299	0.118768	-19.0267	5.23941	-0.629034	6.98497	-48.2034	0.182821	2.02787	-2.21282		Included
PB-13_clumpedLIDI-120241210unbrack	15	VIA1	80	100	853	205	132	108	1.03723	18.9109	56	-2.44304	0.00169856	6.92845	0.00519451	3.96277	0.0332719	14.9743	0.146483	-12.7503	6.69325	-0.309397	1.05475	-23.5117	0.609464	-7.51892	-7.00112		Included
PB-13_clumpedLIDI-120241210unbrack	16	BTCARB15	171	61	1004	176	123	111	1.02749	35.6181	30	-2.09186	0.00145074	8.08402	0.00242286	5.44451	0.0181168	17.009	0.17091	7.83349	2.68362	-0.325302	0.763177	-5.7694	0.583516	-7.1873	-5.86582		Included
PB-13_clumpedLIDI-120241210unbrack	17	18CIC10	202	45	880	454	132	108	1.041	21.2082	56	-0.801932	0.00232835	8.10521	0.00457861	6.80065	0.0276789	16.9904	0.12891	-8.13735	6.07582	-0.331011	0.702874	-22.9116	0.569249	-5.81408	-5.84786		Included
PB-13_clumpedLIDI-120241210unbrack	18	BTCARB18	164	55	870	183	123	111	1.0083	20.2611	56	-1.6235	0.00176861	8.34884	0.00389713	6.21276	0.029155	16.7399	0.144091	-22.3112	5.88284	-0.303909	-0.027065	-36.487	0.601825	-6.69814	-5.60651		Included
PB-13_clumpedLIDI-120241210unbrack	19	ETH-2	103	100	926	227	132	108	1.03808	24.8974	46	-5.34386	0.00173385	-4.96208	0.00390919	-11.1146	0.0215185	-8.96746	0.12452	4.92276	4.79517	-0.757913	0.941347	20.6056	0.219414	-10.1708	-18.6846		Included
PB-13_clumpedLIDI-120241210unbrack	20	IAEA-603	0	100	985	154	130	111	1.03838	32.494	36	7.09796	0.00157479	11.7021	0.00356336	18.3762	0.0250504	24.2575	0.104221	-22.0866	3.68616	-0.52558	0.699915	-51.3674	0.291183	2.46872	-2.32921		Included
PB-13_clumpedLIDI-120241210unbrack	21	VIA1	103	95	936	198	132	111	1.0402	25.7714	44	-2.46229	0.00171435	6.95936	0.00386771	3.96475	0.024162	14.6809	0.112609	-12.5774	5.61084	-0.317687	0.703894	-23.3795	0.600568	-7.54056	-6.97068		Included
PB-13_clumpedLIDI-120241210unbrack	22	ETH-3	100	100	921	183	125	111	1.04419	24.6403	45	6.42893	0.00194807	12.3156	0.00414798	18.6482	0.0282551	24.9621	0.130314	-30.8375	5.64077	-0.169137	0.174902	-60.3103	0.671528	1.7336	-1.7246		Included
PB-13_clumpedLIDI-120241210unbrack	23	BTCARB15	150	67	963	645	973	113	1.03697	28.996	38	-2.10365	0.00152829	8.04268	0.0037245	5.37602	0.0228853	16.8319	0.131574	-9.82649	5.16251	-0.34091	0.670983	-23.1	0.567202	-7.19834	-5.90644	YY	Included	leak rate above 500 microbar/min.Non Condensable Pressure above 150 microbar.
PB-13_clumpedLIDI-120241210unbrack	24	18CIC10	208	45	902	154	130	111	1.03712	22.5025	47	-0.79623	0.0019496	8.1125	0.00394353	6.84041	0.0242488	16.511	0.136248	-31.5426	6.72487	-0.304526	0.216625	-45.9876	0.597392	-5.80827	-5.8407		Considered as outlier	Outlier sensu peirce for raw D47.
PB-13_clumpedLIDI-120241210unbrack	25	BTCARB18	179	53	904	374	137	111	1.03955	22.9132	52	-1.5973	0.00154514	8.45235	0.00409713	6.38999	0.0311992	17.4175	0.126189	-10.2151	6.41498	-0.255787	0.43401	-24.7903	0.65233	-6.67403	-5.5048		Considered as outlier	Outlier sensu peirce for raw D47.
PB-13_clumpedLIDI-120241210unbrack	26	ETH-2	80	100	855	132	123	108	1.07477	18.998	62	-5.32632	0.0020248	-4.92039	0.00397743	-11.0405	0.0276659	-9.93625	0.144722	-4.62794	6.90818	-0.742405	-0.120912	10.8036	0.235588	-10.1536	-18.6437		Included
PB-13_clumpedLIDI-120241210unbrack	27	ETH-1	88	100	887	227	132	106	1.03848	22.4558	52	6.67133	0.00220932	11.7638	0.004855	17.9156	0.0257928	26.5676	0.130679	-41.9072	6.46349	-0.600725	2.83463	-70.2861	0.213422	2.01203	-2.26768	Y	Included
PB-13_clumpedLIDI-120241210unbrack	28	ETH-3	80	100	831	190	128	106	1.03627	18.4387	61	6.4065	0.00224926	12.2734	0.00406758	18.6041	0.0288564	24.9076	0.126245	-47.0431	7.86328	-0.148524	0.205032	-75.9256	0.693884	1.71125	-1.766		Considered as outlier	Outlier sensu peirce for raw D47.
PB-13_clumpedLIDI-120241210unbrack	29	18CIC10	215	44	904	894	1224	111	1.03851	24.1945	47	-0.77305	0.00196659	8.08727	0.00411721	6.76676	0.0282474	16.5622	0.152024	-4.51869	5.78786	-0.376991	0.317064	-19.3428	0.520178	-5.78266	-5.86556	YY	Included	leak rate above 500 microbar/min.Non Condensable Pressure above 150 microbar.
PB-13_clumpedLIDI-120241210unbrack	30	BTCARB18	162	57	877	183	118	106	1.05307	22.3689	51	-1.57211	0.00183936	8.70009	0.0038838	6.56582	0.0241583	18.0843	0.122013	-50.8296	8.23659	-0.348572	0.597934	-65.2831	0.551841	-6.65629	-5.2613		Included
PB-13_clumpedLIDI-120241210unbrack	31	BTCARB15	154	65	951	703	1063	106	1.03638	30.9635	36	-2.09264	0.00140208	8.01449	0.00382002	5.30729	0.0243713	16.9339	0.130345	-11.9731	4.90264							YY	Rejected	leak rate above 500 microbar/min.Non Condensable Pressure above 150 microbar.
PB-13_clumpedLIDI-120241210unbrack	32	ETH-1	89	100	841	198	115	101	1.03476	20.3702	53	6.69403	0.00184074	11.8159	0.00457148	17.9704	0.0329811	33.6356	0.147205	-72.0009	9.70002	-0.620858	9.63525	-99.6013	0.191518	2.03429	-2.21647		Included
PB-13_clumpedLIDI-120241210unbrack	33	IAEA-603	0	100	843	593	660	103	1.03954	20.9991	56	7.0865	0.00196634	11.6583	0.00401996	18.3413	0.0251116	23.8886	0.141692	-23.3183	7.49587	-0.505542	0.426085	-52.4701	0.312866	2.45811	-2.37225	YY	Included	leak rate above 500 microbar/min.Non Condensable Pressure above 150 microbar.
PB-13_clumpedLIDI-120241210unbrack	34	ETH-3	92	100	855	198	115	101	1.02365	21.9226	53	6.41754	0.00184286	12.323	0.00426794	18.6011	0.0247534	25.229	0.143396	-40.2147	8.20713	-0.210893	0.420659	-69.4046	0.627064	1.72119	-1.71726		Included
PB-13_clumpedLIDI-120241210unbrack	35	BTCARB18	184	50	885	615	1102	103	1.04018	24.7539	47	-1.64167	0.0018548	8.37628	0.00315366	6.16827	0.023771	17.2315	0.108388	-33.1641	7.94724	-0.356082	0.401939	-47.215	0.546181	-6.7185	-5.57948	YY	Included	leak rate above 500 microbar/min.Non Condensable Pressure above 150 microbar.
PB-13_clumpedLIDI-120241210unbrack	36	BTCARB15	153	63	921	212	113	98	1.04036	29.4664	39	-2.0946	0.00166035	8.08229	0.00320494	5.4226	0.0204968	17.0734	0.133608	-33.9642	8.79924	-0.342581	0.83004	-46.9969	0.56513	-7.19015	-5.86751		Included
PB-13_clumpedLIDI-120241210unbrack	37	18CIC10	220	43	902	212	128	103	1.03773	25.7961	43	-0.775305	0.00157076	8.05604	0.00369053	6.75608	0.0240312	16.8395	0.109964	-4.24867	8.21224	-0.354822	0.651981	-19.0147	0.544	-5.78391	-5.89626		Included
PB-13_clumpedLIDI-120241210unbrack	38	ETH-2	98	100	899	168	123	103	1.04667	24.0705	45	-5.33329	0.00193008	-4.93426	0.0039518	-11.11	0.0215681	-9.55199	0.119696	19.5627	8.71405	-0.791773	0.295044	35.4053	0.183101	-10.1605	-18.6573		Considered as outlier	Outlier sensu peirce for raw D47.
PB-13_clumpedLIDI-120241210unbrack	39	VIA1	112	88	936	227	130	106	1.03702	28.04	39	-2.43544	0.00173481	6.93426	0.00314611	3.99285	0.0239449	14.5695	0.137768	-11.2937	7.12294	-0.292971	0.643886	-22.09	0.626886	-7.51104	-6.99542		Included
PB-13_clumpedLIDI-120241210unbrack	40	ETH-4	100	100	907	125	125	106	1.00676	23.9438	42	-5.38146	0.00183239	-5.07478	0.0036773	-11.0527	0.0278722	-9.56306	0.146371	32.8297	10.031	-0.545153	0.566435	49.2238	0.447045	-10.2066	-18.7954		Included
PB-13_clumpedLIDI-120241210unbrack	41	18CIC10	210	44	894	198	130	106	1.04106	23.3271	51	-0.799651	0.00173223	8.05825	0.00384445	6.74851	0.0203963	16.4291	0.106225	-8.92659	7.2411	-0.339354	0.243721	-23.6021	0.560621	-5.80992	-5.89403		Included
PB-13_clumpedLIDI-120241210unbrack	42	BTCARB18	166	55	877	168	128	108	1.05657	21.3074	55	-1.64699	0.00198059	8.34382	0.00438699	6.18654	0.0276397	16.5793	0.12069	-22.0998	7.55054	-0.3008	-0.175083	-36.2451	0.605315	-6.72298	-5.61139		Included
PB-13_clumpedLIDI-120241210unbrack	43	BTCARB15	175	60	1007	286	132	108	1.03132	36.3233	33	-2.10631	0.00138971	8.02884	0.00302767	5.3474	0.0230952	16.7482	0.158732	12.4436	2.61464	-0.353135	0.616067	-1.09864	0.554272	-7.20066	-5.92004		Included
PB-13_clumpedLIDI-120241210unbrack	44	ETH-1	91	100	897	198	128	108	1.03332	23.0238	49	6.68603	0.00179669	11.8215	0.00406361	17.9539	0.0244969	28.5567	0.11848	-24.8208	7.13301	-0.634256	4.66307	-53.8266	0.177258	2.02556	-2.21093		Included
PB-13_clumpedLIDI-120241210unbrack	45	ETH-2	95	100	904	234	169	108	1.06924	23.1158	49	-5.34854	0.00196402	-4.98426	0.0040665	-11.147	0.0252704	-9.28376	0.13806	7.85801	6.80865	-0.763961	0.666483	23.6366	0.213128	-10.1749	-18.7064	Y	Included	Non Condensable Pressure above 150 microbar.
PB-13_clumpedLIDI-120241210unbrack	46	ETH-3	80	100	833	190	128	108	1.03672	18.0779	60	6.37403	0.00194561	12.2157	0.0033849	18.5054	0.0317511	24.4581	0.125136	-45.4321	6.79413	-0.156002	-0.119516	-74.2278	0.686463	1.67878	-1.82269		Included
PB-14_clumpedLIDI220241212	1	ETH-3	99	100	894	176	154	103	1.03843	25.2385	48	6.50384	0.0130662	12.5355	0.0273776	18.7043	0.0501037	27.9448	0.153655	151.926	31.5475	-0.404276	2.64983	116.33	0.422739	1.80463	-1.50911	YY	Considered as outlier	Non Condensable Pressure above 150 microbar. First sample of of the carousel is always spurious
PB-14_clumpedLIDI220241212	2	ETH-3	96	100	875	37	123	101	1.0529	23.4769	51	6.37196	0.0019205	12.2415	0.00610899	18.4264	0.0295588	24.8607	0.156082	-9.54749	6.81007	-0.256524	0.222285	-39.4718	0.576551	1.67488	-1.79825	Y	Included
PB-14_clumpedLIDI220241212	3	ETH-3	102	100	914	498	194	101	1.03912	29.3608	40	6.40824	0.00176808	12.3211	0.00552738	18.5641	0.0242683	25.3131	0.134113	-10.1602	6.46963	-0.235758	0.506632	-40.2511	0.597313	1.71063	-1.72005	YY	Included	Non Condensable Pressure above 150 microbar.
PB-14_clumpedLIDI220241212	4	ETH-3	96	100	850	300	553	98	1.03788	22.815	50	6.40635	0.00204617	12.3369	0.00479646	18.5558	0.0262757	25.4528	0.131435	3.60549	11.1867	-0.257313	0.611786	-26.9317	0.57511	1.70803	-1.70448	YY	Included	Non Condensable Pressure above 150 microbar.
PB-14_clumpedLIDI220241212	5	ETH-3	99	100	860	242	147	98	1.02017	24.271	46	6.41514	0.00215171	12.2849	0.00460176	18.487	0.0275437	25.01	0.100774	-5.33433	12.2472	-0.283476	0.282266	-35.5113	0.548446	1.71931	-1.75564	Y	Considered as outlier	Outlier sensu peirce for raw D47.
PB-14_clumpedLIDI220241212	6	ETH-1	104	100	899	212	357	101	1.03903	26.8921	42	6.67512	0.001572	11.8303	0.00423801	17.9353	0.0241766	25.6041	0.103175	-1.16571	8.739	-0.649883	1.76161	-30.8806	0.173024	2.01301	-2.20384	Y	Included	Non Condensable Pressure above 150 microbar.
PB-14_clumpedLIDI220241212	7	ETH-2	96	100	846	227	152	91	1.03688	21.2092	50	-5.33953	0.00150857	-4.9408	0.0050194	-11.1161	0.027828	-8.00344	0.154773	37.5696	13.3007	-0.785014	1.87214	53.7127	0.174382	-10.1725	-18.6904	Y	Included	Non Condensable Pressure above 150 microbar.
PB-14_clumpedLIDI220241212	8	ETH-3	104	100	806	176	98	76	1.03588	27.1952	40	6.41511	0.0017836	12.2909	0.00381417	18.5682	0.0237501	24.8571	0.116282	-51.9752	11.6184	-0.209497	0.121211	-80.7478	0.624391	1.71904	-1.74972		Included
PB-14_clumpedLIDI220241212	9	ETH-4	91	100	750	227	115	76	1.04046	22.3685	53	6.40224	0.00215282	12.2549	0.00428796	18.5597	0.0279156	25.6939	0.144098	-16.2368	12.6452								Rejected	Software or hardware error during the acquisition and/or non steady signal through the acquisition process
PB-14_clumpedLIDI220241212	10	18CIC09	160	56	750	147	89	76	1.05379	22.2118	53	-1.59408	0.00192632	7.88128	0.00348139	5.75789	0.0223518	16.1603	0.123697	-36.5741	11.3659	-0.330524	0.3304	-49.7073	0.561589	-6.65377	-6.07371		Included
PB-14_clumpedLIDI220241212	11	BTCARB17	147	61	758	198	96	76	1.02525	22.6416	50	-1.46001	0.00193482	7.89544	0.00400553	5.93206	0.0239485	16.6644	0.137872	-18.0933	9.67121	-0.309735	0.798498	-31.6438	0.582197	-6.51143	-6.06007		Included
PB-14_clumpedLIDI220241212	12	18CIC11	130	68	738	168	86	76	1.06034	20.712	55	-1.86998	0.00204571	7.39053	0.00367313	5.02268	0.0306393	14.7457	0.116304	-27.3535	12.7669	-0.297848	-0.088673	-39.4109	0.598871	-6.92974	-6.5563		Included
PB-14_clumpedLIDI220241212	13	IAEA-603	0	100	758	227	98	76	1.00729	22.7599	48	7.07971	0.00198406	11.6732	0.00512947	18.38	0.0270039	24.2502	0.130639	-56.8886	10.2117	-0.475104	0.749852	-85.0584	0.351223	2.4499	-2.35939		Included
PB-14_clumpedLIDI220241212	14	ETH-1	103	100	799	476	933	79	1.03995	27.3675	41	6.6824	0.00179377	11.8115	0.00390704	17.9795	0.0259969	24.6028	0.109755	-49.6033	6.74939	-0.59576	0.820812	-77.8506	0.22866	2.02145	-2.22235	Y	Included	Non Condensable Pressure above 150 microbar.
PB-14_clumpedLIDI220241212	15	VIA1	97	93	758	227	98	76	1.03716	22.1303	49	-2.46065	0.00205858	6.96688	0.00365185	4.01373	0.0251204	14.7278	0.122539	-25.3432	10.5019	-0.277943	0.735197	-36.0214	0.6243	-7.54359	-6.97212		Included
PB-14_clumpedLIDI220241212	16	BTCARB17	146	62	758	403	838	79	1.03079	21.7167	49	-1.45326	0.00176663	7.90956	0.00504892	5.95704	0.0291128	16.0768	0.147873	-27.4697	11.2763	-0.305665	0.192067	-40.9241	0.586276	-6.50475	-6.04617	Y	Included	Non Condensable Pressure above 150 microbar.
PB-14_clumpedLIDI220241212	17	18CIC09	151	57	728	198	159	79	1.03782	19.1911	61	-1.65248	0.00197079	7.77676	0.00431511	5.62542	0.0324528	16.1069	0.117642	-1.00704	9.89205	-0.299954	0.485279	-14.3628	0.593776	-6.71216	-6.17649	Y	Included	Non Condensable Pressure above 150 microbar.
PB-14_clumpedLIDI220241212	18	18CIC11	137	67	765	300	640	81	1.03873	22.1303	53	-1.84	0.00191714	7.44262	0.00435389	5.10498	0.0264101	15.3805	0.138064	-32.8589	8.71171	-0.29778	0.433373	-44.9756	0.598542	-6.8997	-6.50508	Y	Included	Non Condensable Pressure above 150 microbar.
PB-14_clumpedLIDI220241212	19	ETH-2	90	100	782	168	108	79	1.01889	23.376	48	-5.34609	0.00167961	-4.98022	0.00372324	-11.0927	0.0291004	-8.83367	0.126952	12.6145	8.46394	-0.715597	1.11298	28.4566	0.245899	-10.178	-18.7292		Included
PB-14_clumpedLIDI220241212	20	IAEA-603	0	100	821	337	780	81	1.03998	28.6994	41	7.07616	0.00150263	11.6817	0.00345181	18.37	0.0220786	23.7164	0.142359	-45.9876	9.6755	-0.489513	0.211673	-74.4946	0.336403	2.44581	-2.35111	Y	Included	Non Condensable Pressure above 150 microbar.
PB-14_clumpedLIDI220241212	21	VIA1	105	8	76	330	98	79	0.00140905	0.0138439	100	4.5553	0.403372	5.26969	0.350793	-171.391	7.67377	2025.53	40.5348	5761.95	7471.41							YYY	Rejected	Sample pressure too low (<600 microbar).Bad adjustment between the belows.Extreme bellow position.
PB-14_clumpedLIDI220241212	22	ETH-3	99	100	792	227	491	81	1.0407	24.926	45	6.41493	0.00196005	12.346	0.00557977	18.6822	0.0327064	24.6812	0.248215	-35.3093	9.45263							Y	Rejected	Non Condensable Pressure above 150 microbar.
PB-14_clumpedLIDI220241212	23	18CIC09	153	59	758	374	824	81	1.00323	21.112	49	-1.61896	0.00200299	7.80493	0.0038618	5.6959	0.0286228	16.0717	0.142233	-1.73059	12.0399	-0.292003	0.394721	-15.1661	0.60164	-6.67747	-6.14883	Y	Included	Non Condensable Pressure above 150 microbar.
PB-14_clumpedLIDI220241212	24	BTCARB17	142	64	763	117	96	81	1.04212	21.7255	49	-1.45	0.00179603	7.89759	0.00400895	5.95218	0.0284733	16.2351	0.125335	-31.7421	12.2796	-0.30218	0.371625	-45.1184	0.589896	-6.50084	-6.05797		Included
PB-14_clumpedLIDI220241212	25	18CIC11	140	66	777	212	233	79	1.03903	23.286	51	-1.88059	0.00193574	7.40586	0.00438824	5.01657	0.0269811	15.4322	0.103518	-11.5753	9.3855	-0.307916	0.557359	-23.8464	0.588511	-6.94161	-6.54118	Y	Included	Non Condensable Pressure above 150 microbar.
PB-14_clumpedLIDI220241212	26	ETH-2	94	100	780	168	93	81	1.06083	23.1158	51	-5.32696	0.00188905	-4.91537	0.00439155	-11.0783	0.0240577	-9.1536	0.132505	-7.69113	8.19857	-0.784921	0.659395	7.68361	0.174294	-10.16	-18.6653		Included
PB-14_clumpedLIDI220241212	27	ETH-1	116	100	843	234	101	81	1.039	31.8872	37	6.6873	0.0019495	11.7794	0.00438604	17.9292	0.0223472	28.4004	0.115719	-38.1331	4.71964	-0.61891	4.59408	-66.6679	0.205015	2.02785	-2.25404		Included
PB-14_clumpedLIDI220241212	28	ETH-3	87	100	745	249	516	81	1.03843	20.2685	56	6.40243	0.00217379	12.2834	0.00360514	18.5888	0.0273425	25.3333	0.112545	-42.8677	9.35947	-0.168969	0.600805	-71.8907	0.666112	1.70582	-1.75713	Y	Considered as outlier	Non Condensable Pressure above 150 microbar.
PB-14_clumpedLIDI220241212	29	18CIC11	139	66	772	205	101	79	1.03683	22.8575	49	-1.85172	0.00163879	7.40535	0.00410536	5.00142	0.0265402	15.6696	0.120276	-36.8054	9.75677	-0.352311	0.792297	-48.7917	0.542773	-6.91083	-6.54175		Included
PB-14_clumpedLIDI220241212	30	18CIC09	152	59	748	212	213	79	1.06276	20.5579	54	-1.61843	0.00201602	7.84774	0.00362325	5.73016	0.029402	16.2217	0.108206	-39.907	9.61954	-0.300241	0.457436	-52.9082	0.592973	-6.67848	-6.10668	Y	Included	Non Condensable Pressure above 150 microbar.
PB-14_clumpedLIDI220241212	31	BTCARB17	135	66	745	242	118	79	1.06861	20.4304	54	-1.46395	0.00213319	7.9078	0.00463471	5.9728	0.0293147	16.7478	0.142321	-53.0494	9.98496	-0.277231	0.856083	-66.136	0.61554	-6.51608	-6.04789		Included
PB-14_clumpedLIDI220241212	32	ETH-1	84	100	741	220	245	79	1.02574	20.4387	52	6.68536	0.00197276	11.8232	0.00465748	18.0117	0.0246118	27.2032	0.111476	-85.711	9.90506	-0.578481	3.33765	-112.908	0.246334	2.02418	-2.21086	Y	Included	Non Condensable Pressure above 150 microbar.
PB-14_clumpedLIDI220241212	33	IAEA-603	0	100	816	220	101	79	1.04046	29.4465	41	7.07422	0.00141254	11.6552	0.00292036	18.2822	0.0266208	24.0492	0.100594	-29.2367	9.00115	-0.547907	0.589233	-58.1939	0.276572	2.44471	-2.37716		Included
PB-14_clumpedLIDI220241212	34	ETH-3	86	100	743	432	985	79	1.03889	21.0602	55	6.42718	0.00195725	12.3271	0.00357906	18.61	0.0324518	26.9146	0.127379	-72.0147	12.2643	-0.216012	2.05745	-100.254	0.617466	1.73059	-1.71412	Y	Included	Non Condensable Pressure above 150 microbar.
PB-14_clumpedLIDI220241212	35	18CIC09	145	59	714	205	96	76	1.05492	18.7365	62	-1.59733	0.00213854	7.83959	0.00387099	5.7682	0.0285972	17.1992	0.136416	-86.0787	9.96212	-0.276284	1.43595	-98.4607	0.617509	-6.6557	-6.11475		Included
PB-14_clumpedLIDI220241212	36	BTCARB17	142	62	743	147	91	74	1.03825	21.9176	52	-1.45701	0.00199092	7.94103	0.00331427	5.96044	0.0307446	16.996	0.142547	-58.4481	9.84262	-0.329096	1.03431	-71.5272	0.562081	-6.5099	-6.01518		Included
PB-14_clumpedLIDI220241212	37	18CIC11	146	63	775	945	1244	84	1.03938	24.5281	46	-1.88541	0.00147867	7.41573	0.00445084	4.94424	0.0270194	10.7043	0.270681	17.6434	8.8255	-0.384504	-4.1208	4.99536	0.509831	-6.94711	-6.53145	YY	Included	leak rate above 500 microbar/min.Non Condensable Pressure above 150 microbar.
PB-14_clumpedLIDI220241212	38	ETH-2	84	100	741	410	870	79	1.04342	20.4321	53	-5.33426	0.00195059	-4.88064	0.00270686	-11.0389	0.0252962	-10.5503	0.105262	37.2574	19.7088	-0.771799	-0.820866	53.2646	0.187643	-10.1691	-18.6311	Y	Included	Non Condensable Pressure above 150 microbar.
PB-14_clumpedLIDI220241212	39	VIA1	82	100	731	557	995	79	1.0218	20.0627	53	-2.45396	0.00203258	6.96155	0.00337391	4.07805	0.0317091	13.3383	0.261593	-22.7155	13.795	-0.215611	-0.624525	-33.4194	0.68831	-7.53627	-6.97739	YY	Included	leak rate above 500 microbar/min.Non Condensable Pressure above 150 microbar.
PB-14_clumpedLIDI220241212	40	ETH-4	85	100	736	212	86	74	1.06515	20.3915	53	-5.36387	0.00187468	-5.01714	0.00363684	-10.9266	0.026241	-9.93364	0.246127	0.601248	14.772	-0.492841	0.076179	16.3489	0.474956	-10.1956	-18.7655		Included
PB-15_clumpedLIDI220241213	1	ETH-3	0	100	721	623	1148	81	1.03755	19.7979	60	6.39052	0.0055487	12.3569	0.0127724	18.5059	0.0261135	25.5417	0.170113	153.129	31.8132	-0.309535	0.658822	118.018	0.505043	1.68612	-1.69376	YYY	Considered as outlier	leak rate above 500 microbar/min.Non Condensable Pressure above 150 microbar. First sample of the run is always spurious
PB-15_clumpedLIDI220241213	2	ETH-3	84	100	741	132	93	76	1.02211	20.9388	55	6.37774	0.00204377	12.2228	0.00380815	18.4582	0.0264232	24.4756	0.136413	-20.8705	8.73761	-0.213048	-0.116577	-50.424	0.607063	1.6774	-1.82575	Y	Included
PB-15_clumpedLIDI220241213	3	ETH-3	85	100	763	1201	1324	89	1.01154	23.2877	49	6.38155	0.00206939	12.3071	0.0036698	18.5643	0.0303637	24.478	0.0937341	-20.8832	8.30471							YYY	Rejected	leak rate too high (>1000 microbar/min).Non Condensable Pressure above 150 microbar.
PB-15_clumpedLIDI220241213	4	ETH-3	93	93	758	139	86	76	1.01192	22.9492	49	6.40025	0.00200515	12.3056	0.00413793	18.5518	0.0216327	24.4335	0.107302	-24.6374	9.74758	-0.224654	-0.321179	-54.2517	0.59431	1.69837	-1.7443	Y	Included
PB-15_clumpedLIDI220241213	5	ETH-3	98	90	775	813	1095	81	1.02113	24.734	45	6.37436	0.00216651	12.2743	0.00474899	18.4884	0.0272578	25.0256	0.162007	-25.1454	8.04506							YYY	Rejected	leak rate above 500 microbar/min.Non Condensable Pressure above 150 microbar.
PB-15_clumpedLIDI220241213	6	ETH-1	101	100	794	388	89	76	1.01809	26.9456	41	6.69015	0.00192453	11.8174	0.00356962	18.0019	0.023798	34.6126	0.136443	-39.349	8.98149	-0.587382	10.5866	-67.9193	0.214776	2.02556	-2.22563		Included
PB-15_clumpedLIDI220241213	7	ETH-2	94	100	770	747	1163	84	1.03816	23.1935	46	-5.34427	0.00177201	-4.93732	0.00344892	-11.0939	0.0222968	-8.5807	0.120903	50.2906	13.1825	-0.761083	1.28213	66.6297	0.190942	-10.195	-18.6937	YY	Included	leak rate above 500 microbar/min.Non Condensable Pressure above 150 microbar.
PB-15_clumpedLIDI220241213	8	ETH-3	85	100	745	183	93	76	1.05951	21.13	51	6.39787	0.00203089	12.3056	0.00429157	18.5527	0.0263576	25.0512	0.119989	-31.9816	12.3171	-0.221292	0.281724	-61.3705	0.597851	1.69584	-1.74435		Included
PB-15_clumpedLIDI220241213	9	ETH-4	98	100	792	755	1151	84	1.03811	25.3464	47	-5.36969	0.00163964	-5.06234	0.00316248	-11.0084	0.0266356	-8.7434	0.11819	55.6711	10.6053	-0.524848	1.36942	72.3878	0.439616	-10.2175	-18.8167	YY	Included	leak rate above 500 microbar/min.Non Condensable Pressure above 150 microbar.
PB-15_clumpedLIDI220241213	10	BTCARB17	155	59	806	154	96	79	1.01777	27.4487	42	-1.47199	0.00160982	7.90854	0.00392889	5.89892	0.023516	15.8837	0.128519	-8.75672	9.53239	-0.343073	0.004006	-22.4485	0.538721	-6.53801	-6.05562		Considered as outlier	Outlier sensu peirce for raw D47.
PB-15_clumpedLIDI220241213	11	BTCARB18	160	54	758	652	1097	81	1.03702	21.8565	52	-1.63866	0.00182048	8.34341	0.00354581	6.16851	0.0277021	17.1199	0.145469	4.79064	13.51	-0.326932	0.357433	-9.75162	0.554268	-6.73179	-5.62712	YY	Included	leak rate above 500 microbar/min.Non Condensable Pressure above 150 microbar.
PB-15_clumpedLIDI220241213	14	ETH-1	89	100	772	190	91	79	1.04067	23.3699	48	6.69323	0.00182852	11.8307	0.00324858	17.998	0.0299027	46.8519	0.141703	-54.7361	8.65719	-0.607204	22.5148	-82.8755	0.193892	2.02835	-2.21252		Included
PB-15_clumpedLIDI220241213	15	POL2	106	88	814	637	1082	84	1.03679	27.392	40	-2.29802	0.00156547	4.56322	0.00359141	1.88452	0.0206178	9.55983	0.115646	0.661546	7.34186	-0.219675	0.408796	-5.81602	0.690848	-7.29607	-9.34723	YY	Included	leak rate above 500 microbar/min.Non Condensable Pressure above 150 microbar.
PB-15_clumpedLIDI220241213	16	BTCARB18	176	50	777	198	91	79	1.04497	23.2436	46	-1.60908	0.00172576	8.42528	0.0040811	6.31373	0.0227562	17.5616	0.155059	19.7174	14.0738	-0.292994	0.629382	4.76709	0.589264	-6.70326	-5.54659		Included
PB-15_clumpedLIDI220241213	18	BTCARB17	135	64	755	161	96	79	1.03688	21.0605	55	-1.46015	0.00205029	7.89083	0.0045039	5.92326	0.0256242	15.3071	0.133375	-33.6355	8.93892	-0.313843	-0.528463	-46.9628	0.569415	-6.52473	-6.07308		Included
PB-15_clumpedLIDI220241213	19	ETH-2	85	100	760	586	985	84	1.06096	20.9839	55	-5.34735	0.00197624	-4.97338	0.00385483	-11.1297	0.0259991	-10.0132	0.131985	12.1741	10.3523	-0.758465	-0.092188	27.9968	0.193899	-10.197	-18.7292	YY	Included	leak rate above 500 microbar/min.Non Condensable Pressure above 150 microbar.
PB-15_clumpedLIDI220241213	21	VIA1	102	90	809	549	1043	84	1.04279	26.7107	43	-2.4916	0.00159551	6.93949	0.00346993	3.99407	0.0245211	14.6757	0.127919	1.78804	8.8337	-0.238789	0.73826	-9.10176	0.659136	-7.59005	-7.00737	YY	Included	leak rate above 500 microbar/min.Non Condensable Pressure above 150 microbar.
PB-15_clumpedLIDI220241213	22	ETH-3	101	100	794	198	89	79	1.04335	25.5959	44	6.42349	0.00162111	12.3059	0.00472204	18.598	0.0246721	25.0773	0.138192	-28.255	8.44379	-0.203476	0.306479	-57.7833	0.616392	1.72315	-1.74404		Included
PB-15_clumpedLIDI220241213	23	BTCARB17	136	63	755	593	1048	81	1.0415	21.535	51	-1.44725	0.00213685	7.91278	0.0040351	5.98976	0.0258203	16.1975	0.112037	20.3099	18.8326	-0.282491	0.304471	6.18173	0.602116	-6.51177	-6.05151	YY	Included	leak rate above 500 microbar/min.Non Condensable Pressure above 150 microbar.
PB-15_clumpedLIDI220241213	24	BTCARB18	174	51	775	198	96	76	1.00969	23.9898	44	-1.63282	0.00176537	8.36052	0.00373761	6.20009	0.0252362	17.5322	0.0827744	-8.1354	14.9575	-0.318255	0.728991	-22.5293	0.563246	-6.72619	-5.6103		Included
PB-15_clumpedLIDI220241213	26	ETH-2	92	100	765	205	89	76	1.03676	23.0443	50	-5.32219	0.00163188	-4.91575	0.00357914	-11.1196	0.0222185	-9.9475	0.12832	20.4708	11.2684	-0.831243	-0.141606	36.2773	0.117089	-10.1723	-18.6725		Considered as outlier	Outlier sensu peirce for raw D47.
PB-15_clumpedLIDI220241213	27	ETH-1	91	100	770	799	1183	84	1.06675	23.7379	50	6.67339	0.00185419	11.8128	0.0037919	17.948	0.0225337	39.279	0.14189	-60.169	10.4205							YY	Rejected	leak rate above 500 microbar/min.Non Condensable Pressure above 150 microbar.
PB-15_clumpedLIDI220241213	28	ETH-3	98	100	782	190	89	76	1.01354	25.0769	45	6.42165	0.00189955	12.3349	0.00494105	18.6115	0.0285437	25.5059	0.127058	-42.2984	11.36	-0.216448	0.66732	-71.4505	0.602638	1.72012	-1.71547		Included
PB-15_clumpedLIDI220241213	29	BTCARB17	141	62	765	901	1241	86	1.06482	22.4263	51	-1.46444	0.00174614	7.89869	0.00372004	5.93261	0.0329934	16.4316	0.112333	-16.2953	11.4991	-0.307785	0.56283	-29.8722	0.575753	-6.52959	-6.06534	YY	Included	leak rate above 500 microbar/min.Non Condensable Pressure above 150 microbar.
PB-15_clumpedLIDI220241213	31	BTCARB18	172	50	765	740	1153	84	1.03561	22.3562	49	-1.64611	0.00193348	8.28618	0.00399207	6.15067	0.0264694	16.8531	0.142488	-9.93708	8.91166	-0.281163	0.208567	-24.1496	0.602635	-6.73764	-5.68345	YY	Included	leak rate above 500 microbar/min.Non Condensable Pressure above 150 microbar.
PB-15_clumpedLIDI220241213	32	ETH-1	103	100	811	147	91	79	1.03639	27.7144	39	6.69327	0.00157056	11.8191	0.00359441	17.9593	0.027001	29.3698	0.125771	-26.2568	9.7603	-0.634032	5.46208	-55.2227	0.16581	2.02882	-2.22394		Considered as outlier	Outlier sensu peirce for raw D47.
PB-15_clumpedLIDI220241213	34	ETH-3	4	100	809	154	93	81	1.0395	27.0948	44	6.40729	0.00225844	12.2563	0.00377984	18.5452	0.0217409	25.6961	0.147084	-14.6963	8.69291	-0.19042	1.00847	-44.5281	0.630451	1.7077	-1.79287		Included
PB-15_clumpedLIDI220241213	35	BTCARB17	149	61	794	520	997	84	1.05738	24.5217	48	-1.4684	0.00200701	7.89532	0.00349292	5.92116	0.0277373	16.4537	0.115608	-10.34	7.81558	-0.31178	0.591363	-23.9885	0.571602	-6.53369	-6.06865	YY	Included	leak rate above 500 microbar/min.Non Condensable Pressure above 150 microbar.
PB-15_clumpedLIDI220241213	36	BTCARB18	180	50	794	212	93	81	1.03173	24.6773	46	-1.63617	0.00180904	8.43835	0.003281	6.27622	0.0289997	17.6709	0.115844	-7.99812	8.2106	-0.315001	0.710911	-22.5387	0.56626	-6.73263	-5.53367		Included
PB-15_clumpedLIDI220241213	38	ETH-2	105	90	828	190	93	81	1.03427	28.1141	40	-5.25055	0.00176814	-4.81242	0.00270526	-10.8637	0.0261127	-8.25587	0.151737	30.9408	5.85037	-0.748891	1.35881	46.6156	0.202538	-10.0997	-18.5709	Y	Included
PB-15_clumpedLIDI220241213	39	POL2	97	94	797	579	1056	84	1.03594	24.4051	45	-2.34819	0.00182324	4.56767	0.00428593	1.8454	0.0269625	10.2943	0.135023	6.52407	10.8667	-0.21119	1.1277	0.053463	0.700011	-7.34975	-9.34274	YY	Included	leak rate above 500 microbar/min.Non Condensable Pressure above 150 microbar.
PB-15_clumpedLIDI220241213	40	ETH-4	98	100	804	198	93	81	1.03035	24.8215	42	-5.22854	0.00166859	-4.81046	0.00345176	-10.5874	0.0263806	-8.32008	0.114667	25.4666	9.06986	-0.494542	1.29004	41.0296	0.469272	-10.0762	-18.5691		Included
PB-15_clumpedLIDI220241213	41	BTCARB18	174	51	777	689	1126	86	1.03861	22.1747	53	-1.62022	0.00157392	8.3904	0.00424154	6.27608	0.0272637	17.8221	0.106469	23.7651	8.34888	-0.284894	0.954798	8.83595	0.598014	-6.71385	-5.5809	YY	Included	leak rate above 500 microbar/min.Non Condensable Pressure above 150 microbar.
PB-15_clumpedLIDI220241213	42	BTCARB17	133	66	770	242	98	81	1.02411	21.5416	53	-1.43439	0.00186186	7.92224	0.00346589	6.00102	0.0260439	16.1277	0.126123	-19.3309	7.82272	-0.29381	0.216996	-32.9413	0.590117	-6.4984	-6.04222		Included
PB-15_clumpedLIDI220241213	44	ETH-1	98	100	809	212	96	84	1.03322	25.4835	45	6.70077	0.00171117	11.8395	0.00470748	18.0454	0.0278408	47.3331	0.179526	-29.7814	5.24718	-0.577044	22.9669	-58.6874	0.22544	2.03607	-2.20382		Included
PB-15_clumpedLIDI220241213	45	ETH-2	99	100	814	696	1158	89	1.05907	25.2739	45	-5.33765	0.00163663	-4.96761	0.00319961	-11.08	0.0220863	-8.88599	0.143244	17.887	8.01832	-0.723963	1.03477	33.7765	0.230013	-10.1868	-18.7235	YY	Included	leak rate above 500 microbar/min.Non Condensable Pressure above 150 microbar.
PB-15_clumpedLIDI220241213	46	ETH-3	110	100	833	220	93	84	1.03531	28.4894	40	6.41728	0.00183489	12.3224	0.00358757	18.6056	0.0238536	25.6335	0.133004	-26.8642	6.22779	-0.205544	0.816739	-56.4586	0.61417	1.71592	-1.72783		Included
PB-16_clumpedLIDI220241216	1	ETH-3	110	86	806	37	89	79	1.0412	28.7477	43	6.53169	0.0156947	12.6259	0.026429	19.0586	0.0768738	56.3024	0.512376	862.194	822.4	-0.172994	30.1258	804.28	0.60516	1.84703	-1.39905	Y	Considered as outlier	First sample of of the carousel is always spurious
PB-16_clumpedLIDI220241216	2	ETH-3	96	95	780	125	96	81	1.04027	22.9687	51	6.36826	0.00192654	12.2553	0.00418101	18.5277	0.0271636	47.9731	0.948492	-153.77	4.92453	-0.166634	22.7513	-179.356	0.615671	1.68606	-1.7644	Y	Included
PB-16_clumpedLIDI220241216	3	ETH-3	94	94	755	227	91	79	1.05085	21.5132	54	6.38262	0.0024648	12.2685	0.00428031	18.5152	0.0298487	51.4256	0.757776	-204.373	5.66574	-0.206478	26.0938	-228.46	0.572285	1.70091	-1.75134	Y	Included
PB-16_clumpedLIDI220241216	4	ETH-1	95	97	784	125	93	81	1.0372	24.1648	47	6.66936	0.00237729	11.7869	0.00361047	17.9808	0.0228552	51.6662	0.543441	-198.054	5.9081	-0.557127	27.3061	-221.841	0.193313	2.02493	-2.22732	Y	Included
PB-16_clumpedLIDI220241216	6	ETH-3	93	97	770	212	98	81	1.04238	22.1341	54	5.86788	0.00498572	11.6482	0.011247	17.5265	0.030158	67.2986	1.20967	-191.174	10.9274	-0.047172	42.8623	-214.287	0.752745	1.17383	-2.3624	Y	Considered as outlier	Outlier sensu peirce for raw D47, rd46, rd47, rd48
PB-16_clumpedLIDI220241216	7	BTCARB09	124	65	687	227	101	84	1.03523	14.6556	78	-1.04381	0.00246014	9.77764	0.00455014	8.26349	0.0305911	53.1474	1.04683	-401.851	5.4285	-0.258866	32.8509	-412.525	0.584112	-6.14098	-4.19283		Included
PB-16_clumpedLIDI220241216	8	BTCARB15	175	59	880	212	98	84	1.02518	35.7093	33	-2.07907	0.00591245	8.12144	0.00216161	5.51563	0.0249021	69.3739	1.10212	-111.663	7.01502	-0.30431	52.2135	-123.729	0.553021	-7.18596	-5.82489		Included
PB-16_clumpedLIDI220241216	9	ETH-4	82	100	750	139	96	84	1.03633	19.2646	57	-5.39281	0.00168995	-5.09767	0.00397488	-10.9899	0.0239291	27.6988	0.604315	-248.321	6.24915	-0.447289	38.2572	-236.346	0.508092	-10.2377	-18.8625		Included
PB-16_clumpedLIDI220241216	10	IAEA-603	80	100	748	176	98	84	1.03577	19.3848	57	7.0805	0.00243153	11.6295	0.00412951	18.4159	0.0247803	58.7837	0.634635	-307.757	5.88914	-0.398202	34.5806	-328.377	0.363777	2.46993	-2.38355		Included
PB-16_clumpedLIDI220241216	11	BTCARB15	159	63	858	212	98	86	1.02991	30.9739	36	-2.10557	0.00145446	8.04508	0.00363739	5.42589	0.02227	101.947	0.460209	-172.436	3.12998	-0.291691	84.4282	-183.532	0.567392	-7.21146	-5.90019		Included
PB-16_clumpedLIDI220241216	14	ETH-1	81	100	748	190	98	84	1.03672	19.3956	61	6.67841	0.00229904	11.7785	0.0037353	17.9954	0.0317604	90.7029	0.627652	-338.354	4.22496	-0.543925	65.4562	-357.975	0.207618	2.03491	-2.23562		Included
PB-16_clumpedLIDI220241216	15	BTCARB09	110	77	719	176	101	84	1.06024	16.8219	70	-1.63704	0.00230387	8.50431	0.00469907	6.40047	0.0312556	82.6933	0.775854	-405.876	5.63092	-0.254958	64.5104	-414.659	0.600912	-6.72785	-5.44806		Included
PB-16_clumpedLIDI220241216	16	BTCARB15	161	63	863	220	101	86	1.03049	31.7582	38	-2.10343	0.0014489	8.09275	0.00310004	5.57015	0.0386706	165.532	1.08224	-242.538	3.53847								Rejected	Software or hardware error during the acquisition and/or non steady signal through the acquisition process
PB-16_clumpedLIDI220241216	18	ETH-2	104	100	775	212	93	84	1.04044	21.3309	55	-5.32238	0.00622223	-4.90975	0.0134742	-11.0506	0.031286	36.6205	0.597723	-183.55	10.1252	-0.767214	46.875	-170.913	0.159454	-10.1694	-18.6772		Included
PB-16_clumpedLIDI220241216	19	ETH-4	107	100	841	205	101	84	1.03602	27.4572	43	-5.39385	0.00139237	-5.07999	0.00342555	-11.0096	0.0263631	14.7175	0.513476	-198.606	5.87252	-0.48359	25.1061	-185.866	0.468619	-10.2394	-18.8451		Included
PB-16_clumpedLIDI220241216	20	BTCARB15	165	61	860	220	98	84	1.03651	32.2562	37	-2.09821	0.00139243	8.11395	0.00366221	5.51827	0.0279412	244.256	0.669959	-333.723	3.18884	-0.274579	224.307	-342.75	0.585441	-7.20614	-5.83225		Included
PB-16_clumpedLIDI220241216	21	BTCARB09	135	68	789	286	98	84	1.04155	23.5126	48	-1.601	0.00206392	8.51849	0.00387335	6.43372	0.0247945	263.025	0.955131	-480.419	4.31038	-0.27299	241.779	-488.134	0.581015	-6.68987	-5.43415		Included
PB-16_clumpedLIDI220241216	22	ETH-3	87	100	738	264	96	81	1.04041	19.3268	57	6.40485	0.00177651	12.325	0.00330909	18.6734	0.0283039	84.053	0.563914	-445.165	6.31821	-0.128841	57.8171	-462.034	0.655925	1.72258	-1.69563		Included
PB-16_clumpedLIDI220241216	23	IAEA-603	100	100	824	242	98	84	1.03314	28.1934	40	7.09006	0.00149193	11.6752	0.00454204	18.423	0.019676	64.8108	0.477546	-327.883	4.53621	-0.445338	40.3759	-347.968	0.312302	2.47846	-2.33849		Included
PB-16_clumpedLIDI220241216	24	VIA1	84	100	745	227	96	79	1.03994	20.2176	53	-2.4577	0.00189401	6.92857	0.00384106	4.0146	0.0285072	59.3218	0.435724	-426.034	9.03311	-0.242742	44.7938	-432.282	0.630294	-7.54651	-7.00122		Included
PB-17_clumpedLIDI220241219	1	ETH-3	82	100	721	44	91	74	1.0387	20.5283	58	6.36669	0.00517494	12.1717	0.0116482	18.3039	0.034899	29.4415	0.210437	173.781	33.0263	-0.303582	4.83175	138.479	0.493856	1.67544	-1.84848	YY	Considered as outlier	First sample of of the carousel is always spurious
PB-17_clumpedLIDI220241219	2	ETH-3	86	100	745	234	93	76	1.02677	21.0428	55	6.39949	0.00209071	12.2888	0.00401902	18.5084	0.0261242	24.9869	0.130432	-32.3733	3.49831	-0.250186	0.252073	-61.7214	0.547859	1.70607	-1.73334	Y	Included
PB-17_clumpedLIDI220241219	3	ETH-3	106	98	787	286	96	76	1.03602	26.7499	44	6.41424	0.00184075	12.3346	0.00337625	18.6312	0.0247187	24.9256	0.10851	-38.4114	3.28078	-0.18917	0.101858	-67.6737	0.610194	1.72011	-1.68841	Y	Included
PB-17_clumpedLIDI220241219	4	ETH-1	101	100	789	256	93	76	1.02639	27.5267	41	6.67723	0.00176854	11.7824	0.00413179	17.9309	0.0218464	43.5811	0.231904	-51.1147	4.37346	-0.609908	19.4173	-79.26	0.179538	2.02034	-2.23188	Y	Included
PB-17_clumpedLIDI220241219	5	ETH-2	102	100	784	337	150	76	1.01638	26.3087	41	-5.35058	0.00158512	-4.96895	0.00390559	-11.1263	0.0225577	-6.7858	0.0919168	2.19335	4.4119	-0.756033	3.15867	17.8547	0.19229	-10.17	-18.6759	Y	Included
PB-17_clumpedLIDI220241219	6	ETH-3	81	100	721	220	93	76	1.03825	19.9123	54	6.39723	0.00184156	12.264	0.0030952	18.5695	0.029466	27.7758	0.112488	-85.207	7.77002	-0.163772	3.02274	-112.908	0.636776	1.70458	-1.75772		Included
PB-17_clumpedLIDI220241219	8	BTCARB08	120	84	772	198	91	79	1.03555	24.2745	44	-1.72312	0.00176632	8.474	0.00435763	6.21631	0.0277098	19.2965	0.131925	-55.8059	6.83382	-0.319439	2.23857	-69.624	0.545571	-6.80252	-5.46616		Included
PB-17_clumpedLIDI220241219	9	ETH-4	105	100	716	425	93	79	1.03849	18.3569	63	-5.37999	0.00205581	-5.09524	0.00369581	-11.0067	0.0300241	-8.22071	0.102215	-25.7637	8.4971	-0.479936	1.96372	-10.2612	0.47681	-10.1966	-18.8		Included
PB-17_clumpedLIDI220241219	10	IAEA-603	120	100	833	205	101	79	1.03504	31.7057	38	7.0927	0.00225295	11.6595	0.00281927	18.3845	0.0240676	24.3799	0.154311	-71.6269	4.18273	-0.470699	0.903793	-99.3448	0.320778	2.46721	-2.35366		Included
PB-17_clumpedLIDI220241219	11	BTCARB08	112	88	750	212	98	79	1.03824	21.1492	54	-1.72048	0.00194617	8.44278	0.00399545	6.27853	0.0265294	18.6776	0.125328	-73.9874	7.9921	-0.229915	1.69203	-87.4864	0.637694	-6.79857	-5.49686		Included
PB-17_clumpedLIDI220241219	12	BTCARB19	162	56	687	227	96	79	1.03621	15.9961	69	-0.664509	0.00220369	11.8238	0.00411154	10.736	0.0299436	24.8229	0.138102	-130.905	9.4279	-0.191393	1.01139	-150.146	0.652375	-5.79821	-2.17479		Considered as outlier	Outlier sensu peirce for raw D47.
PB-17_clumpedLIDI220241219	13	ETH-3	106	100	799	183	93	79	1.03941	26.4655	43	6.40029	0.00163133	12.2556	0.00375438	18.5841	0.0275731	26.8255	0.157041	-53.9299	4.53508	-0.144435	2.11196	-82.5659	0.656668	1.70814	-1.76597		Included
PB-17_clumpedLIDI220241219	14	ETH-1	119	100	853	205	101	81	1.0355	33.8022	33	6.6763	0.00145973	11.7451	0.00414775	17.9448	0.0262497	62.5831	0.178873	-118.474	5.89002	-0.55901	38.0558	-144.558	0.232034	2.02072	-2.26858		Included
PB-17_clumpedLIDI220241219	15	BTCARB19	171	19	252	593	103	79	0.186616	1.90642	100	-0.484228	0.0118791	12.957	0.0259294	11.7152	0.115918	114.896	1.0134	-1999.27	50.5782							YYYY	Rejected	Sample pressure too low (<600 microbar).Bad adjustment between the belows.leak rate above 500 microbar/min.Extreme bellow position.
PB-17_clumpedLIDI220241219	16	BTCARB08	120	86	787	982	1290	91	1.03794	24.1391	45	-1.71245	0.00186799	8.41008	0.0111041	6.15978	0.0295938	13.9701	0.661228	-35.233	4.81957	-0.324321	-2.87234	-49.2446	0.540847	-6.78882	-5.52904	YY	Considered as outlier	leak rate above 500 microbar/min.Non Condensable Pressure above 150 microbar.
PB-17_clumpedLIDI220241219	17	ETH-2	91	100	777	198	103	81	1.03815	22.8314	51	-5.32889	0.00168015	-4.9655	0.00345063	-10.9933	0.0275589	-8.40386	0.117346	-26.7579	6.35745	-0.647575	1.51747	-11.5787	0.303572	-10.147	-18.6726		Considered as outlier	Outlier sensu peirce for raw D47.
PB-17_clumpedLIDI220241219	20	BTCARB19	174	20	272	623	101	81	0.193286	2.12507	100	-0.529731	0.0102672	12.8577	0.0209111	11.434	0.101701	37.2154	0.613423	-995.938	31.4353							YYYY	Rejected	Sample pressure too low (<600 microbar).Bad adjustment between the belows.leak rate above 500 microbar/min.Extreme bellow position.
PB-17_clumpedLIDI220241219	22	IAEA-603	95	48	350	440	101	81	0.32628	3.53173	100	7.40089	0.00513948	12.3222	0.0107963	19.6473	0.0860744	28.2087	0.434834	-542.402	22.8738							YYY	Rejected	Sample pressure too low (<600 microbar).Bad adjustment between the belows.Extreme bellow position.
PB-17_clumpedLIDI220241219	23	POL2	89	100	767	190	103	81	1.04	21.8389	51	-2.26784	0.00179871	4.60439	0.00365924	1.97305	0.0315263	10.639	0.12401	18.0305	8.67352	-0.202814	1.39609	11.3264	0.689942	-7.24038	-9.26975		Included
PB-18_clumpedLIDI220241217	1	ETH-3	86	100	806	168	93	79	1.03956	23.2563	52	6.52646	0.0102133	12.4819	0.0153286	18.7912	0.0470338	36.6221	0.504835	260.517	60.0095	-0.290216	11.2206	221.663	0.489774	1.83007	-1.5639	YY	Considered as outlier	First sample of of the carousel is always spurious
PB-18_clumpedLIDI220241217	2	ETH-3	93	100	841	308	101	81	1.03749	25.5503	46	6.39991	0.00179813	12.2868	0.00350389	18.5939	0.0261722	29.6911	0.156256	-119.968	5.07361	-0.164731	4.8468	-146.656	0.62518	1.70247	-1.75544	Y	Included
PB-18_clumpedLIDI220241217	3	ETH-3	80	100	797	249	96	81	1.03491	21.9899	52	6.40285	0.00269856	12.2806	0.00436541	18.5546	0.0269949	29.8726	0.1076	-163.662	7.563	-0.200251	5.03617	-189.018	0.587476	1.70583	-1.7615	Y	Included
PB-18_clumpedLIDI220241217	4	ETH-1	80	100	775	315	98	81	1.05914	19.8315	58	6.6932	0.00232249	11.7868	0.00494697	17.9853	0.029001	49.8678	0.197935	-254.102	8.54725	-0.577088	25.5494	-276.245	0.188486	2.03306	-2.24746	Y	Included
PB-18_clumpedLIDI220241217	5	ETH-2	86	100	799	337	98	81	1.00973	21.4074	50	-5.34603	0.00157143	-4.95801	0.00408997	-11.0994	0.0259642	7.18032	0.153293	-188.865	8.16098	-0.744318	17.2423	-176.211	0.200927	-10.1698	-18.6776	Y	Included
PB-18_clumpedLIDI220241217	6	ETH-3	80	100	799	264	101	81	1.04406	22.2049	50	6.38412	0.00220602	12.2377	0.00399748	18.559	0.0276433	38.6225	0.148564	-287.82	6.14798	-0.135133	13.661	-309.341	0.65704	1.68746	-1.80365		Considered as outlier	Outlier sensu peirce for raw D47.
PB-18_clumpedLIDI220241217	7	BTCARB09	117	77	780	344	98	81	1.05701	19.9367	55	-1.64091	0.00225591	8.48377	0.0037941	6.40346	0.0260535	170.378	0.449184	-443.65	6.7591	-0.227974	150.769	-451.851	0.637714	-6.71957	-5.47514		Included
PB-18_clumpedLIDI220241217	8	BTCARB08	120	80	828	271	101	81	1.03582	24.6841	44	-1.70106	0.00168879	8.49799	0.00373241	6.32014	0.0250297	47.9787	0.281649	-264.517	6.09675	-0.262452	30.3917	-275.332	0.601414	-6.78413	-5.46103		Included
PB-18_clumpedLIDI220241217	9	ETH-4	99	100	838	103	98	81	1.03824	25.5264	46	-5.36436	0.00163244	-5.05763	0.00285308	-10.9739	0.0260949	8.66795	0.149217	-192.093	8.35128	-0.500141	18.9488	-179.312	0.46106	-10.1856	-18.7755		Included
PB-18_clumpedLIDI220241217	10	IAEA-603	110	100	860	308	103	84	1.04042	29.0129	41	7.09725	0.00157366	11.7147	0.00376986	18.4491	0.0270952	33.2834	0.133064	-252.893	7.04829	-0.46552	9.49318	-275.28	0.304673	2.46592	-2.31925		Included
PB-18_clumpedLIDI220241217	11	BTCARB08	110	87	826	227	101	84	1.03698	24.1281	48	-1.7072	0.00205359	8.50727	0.00351031	6.32336	0.0261689	37.412	0.123096	-268.878	8.96925	-0.261951	19.9837	-279.637	0.601929	-6.79101	-5.4519		Included
PB-18_clumpedLIDI220241217	12	BTCARB09	126	74	806	249	101	84	1.05808	22.0946	52	-1.64265	0.00187451	8.48247	0.003604	6.3743	0.0283154	31.3009	0.13061	-312.19	8.66685	-0.253868	14.025	-322.326	0.610232	-6.72138	-5.47641		Included
PB-18_clumpedLIDI220241217	13	ETH-3	105	100	853	278	101	84	1.03721	27.7315	41	6.41251	0.00195281	12.3383	0.00441888	18.6529	0.0202185	36.8018	0.121208	-261.751	6.37268	-0.169664	11.683	-284.221	0.61952	1.714	-1.70485		Included
PB-18_clumpedLIDI220241217	14	ETH-1	89	100	811	256	101	81	1.04153	22.8776	48	6.67719	0.00218158	11.8303	0.00408961	18.0236	0.0249595	139.407	0.312858	-405.193	7.10626	-0.565277	112.919	-422.889	0.200856	2.01443	-2.20471		Included
PB-18_clumpedLIDI220241217	15	BTCARB09	129	74	821	505	101	84	1.02618	23.5069	45	-1.64486	0.00196409	8.46069	0.00357356	6.31999	0.0278062	31.5953	0.154322	-268.183	7.68548	-0.284321	14.3583	-278.935	0.578043	-6.72293	-5.49782	Y	Included	leak rate above 500 microbar/min.
PB-18_clumpedLIDI220241217	16	BTCARB08	115	81	802	308	101	81	1.05668	21.541	50	-1.71536	0.00178987	8.49335	0.00458343	6.29101	0.0262671	28.7468	0.148644	-299.214	7.58938	-0.272088	11.4919	-309.501	0.591308	-6.7992	-5.46556		Included
PB-18_clumpedLIDI220241217	17	ETH-2	81	100	792	293	101	84	1.03854	20.419	57	-5.34893	0.00189205	-5.00502	0.0045638	-10.9543	0.0235063	-0.116426	0.102903	-225.083	9.03484	-0.548294	9.96805	-212.919	0.409469	-10.1711	-18.7238		Considered as outlier	Outlier sensu peirce for raw D47, rd48
PB-18_clumpedLIDI220241217	18	ETH-4	99	100	811	139	101	81	1.00933	22.715	50	-5.39074	0.00173401	-5.04673	0.00311383	-10.8819	0.0259641	-3.46542	0.116822	-231.772	10.3875	-0.390594	6.66967	-219.614	0.57753	-10.2141	-18.7647		Considered as outlier	Outlier sensu peirce for raw D47.
PB-18_clumpedLIDI220241217	19	BTCARB08	100	88	758	337	98	79	1.03828	18.4682	62	-1.73112	0.00195662	8.47557	0.00314915	6.40743	0.0300651	30.6761	0.115544	-333.276	10.6466								Rejected	Software or hardware error during the acquisition and/or non steady signal through the acquisition process
PB-18_clumpedLIDI220241217	20	BTCARB09	125	74	799	264	98	79	1.03664	22.4559	51	-1.66327	0.00176879	8.43368	0.00416539	6.43771	0.0263238	26.5426	0.112757	-278.23	8.90987								Rejected	Software or hardware error during the acquisition and/or non steady signal through the acquisition process
PB-18_clumpedLIDI220241217	21	ETH-3	98	100	816	271	98	81	1.02161	24.1747	46	6.40105	0.00161178	12.2886	0.00413085	18.6814	0.0263358	34.2573	0.198573	-342.387	7.34542	-0.08173	9.29921	-362.333	0.713309	1.70361	-1.75367		Considered as outlier	Outlier sensu peirce for raw D47.
PB-18_clumpedLIDI220241217	22	IAEA-603	110	100	850	278	176	79	1.03705	28.8215	39	7.09244	0.00186827	11.6946	0.00297226	18.4806	0.0206199	31.624	0.188973	-269.745	8.59769	-0.410173	7.91188	-291.596	0.363615	2.46153	-2.33896	Y	Included	Non Condensable Pressure above 150 microbar.
PB-18_clumpedLIDI220241217	23	VIA1	91	100	799	300	98	79	1.03957	22.5257	48	-2.45632	0.00185224	6.99388	0.00426802	4.09671	0.0304331	18.5525	0.125296	-257.298	9.32515	-0.226152	4.45332	-265.477	0.654822	-7.53309	-6.9376		Included
PB-19_clumpedLIDI220250115	3	ETH-3	96	94	765	147	106	79	1.04007	22.9295	51	6.48612	0.00778961	12.5012	0.0172569	18.8464	0.0447336	119.83	0.685571	39.3375	14.1736	-0.21343	92.3478	7.30666	0.559476	1.77859	-1.60756	Y	Included
PB-19_clumpedLIDI220250115	4	ETH-3	87	100	765	22	103	84	1.06212	20.3325	58	6.38218	0.0028807	12.2574	0.00664914	18.4968	0.0318008	57.3787	0.751548	-107.221	6.37672	-0.213341	31.9262	-134.23	0.560728	1.67681	-1.84687	Y	Included
PB-19_clumpedLIDI220250115	5	ETH-3	89	100	758	183	108	84	1.03	20.4274	55	6.39561	0.00219475	12.2478	0.00557071	18.5671	0.0330906	113.781	0.696622	-176.026	6.75171	-0.148771	86.9916	-200.951	0.624325	1.69147	-1.85636	Y	Included
PB-19_clumpedLIDI220250115	6	ETH-1	101	100	804	264	103	84	1.03532	24.6839	46	6.67793	0.00228003	11.8331	0.00671258	18.0567	0.0249591	201.286	0.448967	-240.433	4.88696	-0.536327	173.353	-263.036	0.242906	2.00737	-2.26454		Included
PB-19_clumpedLIDI220250115	7	ETH-2	101	100	814	227	108	86	1.03215	24.9374	44	-5.34312	0.00198369	-4.95987	0.00461586	-11.025	0.0239705	79.1855	0.519002	-161.518	5.66854	-0.670319	89.9709	-148.437	0.207305	-10.1784	-18.7409		Included
PB-19_clumpedLIDI220250115	8	ETH-3	83	100	738	44	98	86	1.03618	17.9953	59	6.38714	0.00235779	12.2483	0.00630905	18.6092	0.0285609	89.9965	0.386393	-292.992	7.3719								Rejected	Software or hardware error during the acquisition and/or non steady signal through the acquisition process
PB-19_clumpedLIDI220250115	9	ETH-4	90	100	799	352	111	86	1.0354	22.6094	47	-5.40217	0.00148276	-5.11452	0.00433676	-10.9348	0.0303857	64.5139	0.473834	-208.618	5.63341	-0.365221	75.4869	-195.975	0.508609	-10.2356	-18.8927		Considered as outlier	Outlier sensu peirce for raw D47, rd48
PB-19_clumpedLIDI220250115	10	BTCARB08	125	74	782	271	98	89	1.05332	21.1727	50	-1.73159	0.00201197	8.49112	0.00649793	6.36411	0.0283798	91.9742	0.381071	-266.003	6.33979	-0.180524	73.6636	-276.762	0.633577	-6.82709	-5.53009		Included
PB-19_clumpedLIDI220250115	11	BTCARB15	160	65	885	308	111	89	1.02986	33.6812	36	-2.12311	0.00169466	8.00835	0.00561626	5.45657	0.0266725	247.339	1.05641	-262.46	3.874	-0.207249	227.598	-272.283	0.610181	-7.22637	-6.00365		Included
PB-19_clumpedLIDI220250115	12	BTCARB18	180	54	831	205	101	89	1.04238	24.1722	48	-1.66821	0.00188877	8.37722	0.00498322	6.37424	0.0270056	94.4017	0.47128	-281.185	6.34994	-0.124953	76.2934	-291.613	0.688479	-6.7554	-5.64216		Considered as outlier	Outlier sensu peirce for raw D47, rd48 and rd49
PB-19_clumpedLIDI220250115	13	IAEA-603	82	100	794	286	111	91	1.06073	21.791	53	7.0717	0.002079	11.6507	0.00395195	18.4253	0.0291005	124.644	0.487008	-349.664	5.75532	-0.400608	98.8891	-369.056	0.375844	2.43346	-2.44465		Included
PB-19_clumpedLIDI220250115	14	ETH-1	82	100	763	242	108	91	1.06045	18.9009	60	6.66623	0.00198365	11.856	0.00526357	18.098	0.0285257	146.514	0.565926	-416.713	6.17029	-0.505991	119.804	-434.088	0.272758	1.99406	-2.24202		Included
PB-19_clumpedLIDI220250115	15	POL2	105	93	828	249	111	91	1.03581	24.4659	46	-2.30174	0.0016091	4.67636	0.00464255	2.05155	0.0276065	91.8261	0.668425	-270.195	4.28144	-0.159848	81.6857	-275.076	0.66838	-7.29421	-9.27773		Included
PB-19_clumpedLIDI220250115	16	BTCARB15	175	61	914	190	103	91	1.03221	35.7766	31	-2.11102	0.00156025	8.05155	0.00402964	5.48144	0.0259552	212.574	0.562547	-264.112	2.30945	-0.237132	193.281	-273.984	0.580557	-7.21509	-5.96123		Included
PB-19_clumpedLIDI220250115	17	BTCARB08	115	80	782	220	113	91	1.0362	19.9347	53	-1.71563	0.00231812	8.50091	0.00586014	6.36397	0.0323443	286.88	1.02576	-503.519	3.88561	-0.206709	265.277	-510.814	0.607692	-6.81044	-5.5205		Included
PB-19_clumpedLIDI220250115	18	BTCARB18	155	67	885	37	106	91	1.0295	30.7954	35	-2.10657	0.00162776	8.07578	0.00589827	5.56682	0.0282333	153.759	1.05941	-269.097	4.57719	-0.180464	135.348	-278.939	0.636292	-7.21124	-5.93743		Considered as outlier	Outlier sensu peirce for raw D47, rd48 and rd49
PB-19_clumpedLIDI220250115	19	ETH-2	94	100	802	396	111	89	1.03973	22.0425	53	-5.36622	0.00256957	-4.96064	0.00796487	-10.9232	0.0303263	99.2985	0.895368	-301.262	5.29911	-0.542846	110.287	-290.343	0.33298	-10.203	-18.7416		Considered as outlier	Outlier sensu peirce for raw D47.
PB-19_clumpedLIDI220250115	20	IAEA-603	84	100	802	198	101	86	1.06586	22.6773	53	7.07958	0.00258022	11.7684	0.0108588	18.5019	0.0219208	68.6784	0.41218	-344.116	5.36494	-0.447752	43.9623	-363.824	0.328984	2.43755	-2.32902		Included
PB-19_clumpedLIDI220250115	21	VIA2	97	99	814	359	106	89	1.03636	24.5453	47	-2.62958	0.00217965	7.25867	0.00883051	4.10733	0.0292885	159.529	0.512973	-344.025	5.86787	-0.294789	142.877	-351.464	0.528137	-7.7383	-6.73926		Included
PB-19_clumpedLIDI220250115	22	ETH-3	80	100	741	161	101	89	1.03711	17.3402	64	6.40804	0.00242387	12.4034	0.00731093	18.877	0.0284631	81.2455	0.416706	-447.271	5.85547	-0.008361	54.9143	-464.159	0.762095	1.69901	-1.70352		Considered as outlier	Outlier sensu peirce for raw D47, rd48
PB-19_clumpedLIDI220250115	23	BTCARB08	118	80	804	183	113	89	1.03644	22.2051	50	-1.71305	0.0018058	8.47806	0.00446435	6.41942	0.0291582	135.398	0.693861	-353.972	6.52492	-0.132016	116.388	-363.438	0.681345	-6.80686	-5.54296		Included
PB-19_clumpedLIDI220250115	24	BTCARB15	165	63	887	256	103	89	1.03142	33.3217	34	-2.09477	0.00136089	8.14484	0.00448524	5.5759	0.0206479	169.964	0.611462	-261.21	3.22444	-0.250965	151.136	-271.266	0.566568	-7.20121	-5.86958		Included
PB-19_clumpedLIDI220250115	25	BTCARB18	164	55	775	264	113	86	1.03805	20.8122	51	-1.63587	0.00170297	8.35756	0.00457639	6.33118	0.0277833	219.4	0.9922	-453.022	5.46816	-0.181977	199.27	-460.955	0.632251	-6.72024	-5.66155		Considered as outlier	Outlier sensu peirce for raw D47, rd48 and rd49
PB-19_clumpedLIDI220250115	26	ETH-2	90	87	665	198	98	86	1.03332	13.088	78	-5.32407	0.00243507	-4.72023	0.00532113	-10.6948	0.0295976	57.2196	0.647694	-583.024	8.72776	-0.593072	67.2713	-576.728	0.282567	-10.167	-18.5054	Y	Considered as outlier	Outlier sensu peirce for raw D47, rd46, rd47, rd48
PB-19_clumpedLIDI220250115	27	ETH-1	110	100	831	249	103	84	1.03922	28.4214	42	6.70246	0.00185554	11.9218	0.00682718	18.0718	0.027387	250.767	1.86397	-336.053	4.18498	-0.63271	221.469	-355.938	0.147576	2.03025	-2.17741		Included
PB-19_clumpedLIDI220250115	28	ETH-3	85	100	767	264	96	84	1.04128	20.6911	56	6.40919	0.00218753	12.4081	0.00554215	18.8549	0.0235687	70.965	0.399769	-374.64	6.80174	-0.035854	44.8744	-393.754	0.73499	1.70006	-1.69885		Considered as outlier	Outlier sensu peirce for raw D47, rd48
PB-19_clumpedLIDI220250115	29	BTCARB15	158	63	848	300	103	81	1.03206	31.9649	37	-2.09326	0.0013869	8.12438	0.00341568	5.56476	0.0310437	351.911	1.26791	-454.493	2.68528	-0.243659	330.208	-461.897	0.573827	-7.19884	-5.88969		Included
PB-19_clumpedLIDI220250115	30	BTCARB18	163	54	755	242	106	79	1.03873	21.106	53	-1.63393	0.00258551	8.42483	0.0105473	6.33179	0.028998	162.906	0.418638	-501.597	6.35473	-0.248949	143.556	-508.891	0.566043	-6.72064	-5.59545		Included
PB-19_clumpedLIDI220250115	31	BTCARB08	116	75	741	300	101	79	1.00568	20.2135	53	-1.69717	0.0019629	8.6171	0.00531518	6.38681	0.02936	173.814	0.845668	-568.602	6.22765	-0.316309	153.842	-575.046	0.499272	-6.79505	-5.40635		Considered as outlier	Outlier sensu peirce for raw D47 and rd46.
PB-19_clumpedLIDI220250115	32	ETH-1	97	100	784	198	91	79	1.03331	24.9249	44	6.70112	0.00203708	11.9581	0.00717632	18.1346	0.0253383	205.866	0.694771	-517.662	5.60656	-0.60496	177.536	-532.141	0.174799	2.02748	-2.14174		Included
PB-19_clumpedLIDI220250115	33	IAEA-603	98	100	789	366	98	79	1.03222	25.4615	42	7.07657	0.00180265	11.7863	0.00333927	18.4569	0.0229619	241.517	0.77633	-489.176	4.65589	-0.506208	212.761	-504.541	0.271347	2.43368	-2.31144		Included
PB-19_clumpedLIDI220250115	34	ETH-3	110	100	806	249	93	79	1.01721	27.1152	39	6.42311	0.00207477	12.4355	0.00768622	18.7346	0.0245122	64.7541	0.240737	-264.521	7.5449	-0.194868	38.7584	-287.049	0.578197	1.71388	-1.67192		Included
PB-19_clumpedLIDI220250115	35	BTCARB08	101	83	714	125	101	81	1.03592	17.4226	66	-1.72321	0.00238676	8.51273	0.00613768	6.38726	0.0304017	144.861	0.978838	-435.472	5.40395	-0.187248	125.616	-443.775	0.626853	-6.81896	-5.50887		Included
PB-19_clumpedLIDI220250115	36	BTCARB15	160	62	850	183	96	81	1.03176	30.2181	39	-2.07761	0.0026348	8.15831	0.00830106	5.64103	0.0244049	166.263	1.16134	-281.255	2.85689	-0.217085	147.464	-291.069	0.599843	-7.18342	-5.85638		Included
PB-19_clumpedLIDI220250115	37	BTCARB18	164	54	753	234	101	81	1.042	20.1858	55	-1.64769	0.00217418	8.31887	0.00495132	6.3316	0.0275522	219.466	0.854191	-466.063	5.32703	-0.131635	199.427	-473.76	0.682015	-6.73141	-5.69955		Considered as outlier	Outlier sensu peirce for raw D47, rd48 and rd49
PB-19_clumpedLIDI220250115	38	ETH-2	100	100	802	278	93	84	1.03299	24.6388	45	-5.33018	0.00189322	-4.86187	0.0047102	-10.9381	0.0258657	27.7498	0.430512	-222.167	6.25367	-0.692766	37.8166	-210.196	0.184825	-10.1683	-18.6446		Included
PB-19_clumpedLIDI220250115	39	VIA2	83	100	755	168	103	81	1.04156	20.0715	54	-2.66315	0.00220046	7.09123	0.0042783	4.12655	0.0287116	92.4303	0.382879	-346.132	6.54289	-0.077526	77.1001	-353.313	0.742848	-7.7679	-6.90374		Considered as outlier	Outlier sensu peirce for raw D47.
PB-19_clumpedLIDI220250115	40	ETH-4	96	100	792	249	96	84	1.03258	23.3512	46	-5.38548	0.00187402	-5.00269	0.00425235	-10.8673	0.0234029	19.8602	0.296137	-213.37	7.75025	-0.424764	30.1414	-200.994	0.449522	-10.222	-18.7829		Included
PB-19_clumpedLIDI220250115	41	BTCARB08	108	79	728	220	101	84	1.04041	18.0233	58	-1.72499	0.00258161	8.49622	0.00854282	6.40116	0.0301993	134.367	0.63117	-399.38	6.25139	-0.155512	115.334	-408.194	0.65818	-6.82024	-5.52509		Included
PB-19_clumpedLIDI220250115	42	BTCARB18	179	52	794	220	96	84	1.03162	23.9314	44	-1.64725	0.00155843	8.35746	0.00633257	6.25562	0.0234536	130.804	0.567768	-296.462	5.95839	-0.2452	112.137	-306.657	0.570003	-6.73235	-5.66162		Included
PB-19_clumpedLIDI220250115	43	BTCARB15	170	61	880	256	101	84	1.02628	35.6074	34	-2.10794	0.00165654	8.04449	0.00654665	5.53613	0.0215856	749.893	4.18698	-644.579	3.7594	-0.179048	722.075	-649.343	0.637794	-7.21155	-5.96817		Included
PB-19_clumpedLIDI220250115	44	ETH-1	81	100	694	220	98	84	1.04038	15.0732	74	6.65642	0.00257728	11.7661	0.00678808	18.1508	0.0330272	141.44	0.941892	-567.871	5.57657								Rejected	Software or hardware error during the acquisition and/or non steady signal through the acquisition process
PB-19_clumpedLIDI220250115	45	ETH-2	96	100	799	183	103	84	1.03423	23.4795	48	-5.32558	0.0019476	-4.86657	0.00447127	-10.9402	0.0225537	129.081	1.15507	-290.839	5.27387	-0.695005	140.151	-279.922	0.182619	-10.1632	-18.6492		Included
PB-19_clumpedLIDI220250115	46	ETH-3	98	100	802	249	101	86	1.05713	24.0452	48	6.40245	0.00218327	12.3213	0.00626119	18.669	0.0268822	59.5247	0.299357	-258.633	5.78332	-0.127053	33.8901	-281.166	0.645454	1.69606	-1.78417		Considered as outlier	Outlier sensu peirce for raw D47, rd48
PB-2_clumpedLIDI220240523bis	1	BDH	97	94	838	227	128	103	1.01209	27.3899	46	7.08073	0.00219809	13.4011	0.00456706	20.0401	0.0213119	29.4063	0.278532	-13.0886	4.68817	-0.525089	2.36081	-45.773	0.30358	2.51225	-0.487095	Y	Considered as outlier	First sample of of the carousel is always spurious
PB-2_clumpedLIDI220240523bis	2	BDH	110	10	103	110	352	101	0.00133621	0.01704	100	11.8422	0.41886	23.3072	0.606674	45.5375	5.14721	4776.65	208.877	-50807.3	2871.97							YYYYYY	Rejected	Sample pressure too low (<600 microbar).Bad adjustment between the belows.Non Condensable Pressure above 150 microbar.Extreme bellow position.
PB-2_clumpedLIDI220240523bis	3	BDH	92	100	850	308	118	106	1.01552	28.0552	44	6.54187	0.00196083	11.9308	0.00309992	17.9105	0.0434962	28.5841	0.400875	-52.5537	42.109	-0.635294	4.47292	-80.7895	0.205013	1.98597	-1.96977	Y	Considered as outlier	Outlier sensu peirce for raw D47 and raw d18O
PB-2_clumpedLIDI220240523bis	4	BDH	117	87	931	168	118	106	1.01115	38.7919	32	6.5434	0.00190971	11.9628	0.00288482	18.0227	0.0241851	28.155	0.326011	-46.7746	16.7536	-0.557857	3.99029	-75.2416	0.280562	1.98643	-1.93748	Y	Included
PB-2_clumpedLIDI220240523bis	5	BDH	110	92	931	286	123	106	1.01471	39.3802	31	6.55466	0.00231476	11.9844	0.00244946	18.0776	0.0224385	25.5043	0.248644	-30.26	4.8081	-0.536478	1.35909	-59.2709	0.301309	1.99777	-1.91567	Y	Included
PB-2_clumpedLIDI220240523bis	6	ETH-1	110	91	916	242	118	106	2.48282	36.4981	32	6.64944	0.00175704	11.8345	0.00710184	17.7206	0.0632337	59.3841	2.167	-34.1813	9.16694							YY	Rejected	Bad adjustment between the belows.
PB-2_clumpedLIDI220240523bis	7	ETH-2	110	100	911	293	123	106	1.01513	34.7527	33	-5.39206	0.00137881	-4.97607	0.00307781	-11.2823	0.0352571	70.5259	0.89681	-34.8928	2.09814	-0.863686	81.26	-19.7537	0.113306	-10.2469	-19.0055		Considered as outlier	Outlier sensu peirce for raw D47, rd45, rd47, rd48
PB-2_clumpedLIDI220240523bis	8	ETH-3	83	100	828	154	118	103	1.01173	25.4327	44	5.81677	0.00211651	11.5165	0.00321087	17.1449	0.0245033	45.6387	0.144011	-61.7592	2.62254	-0.241911	21.9643	-88.288	0.594868	1.21983	-2.38624		Included
PB-2_clumpedLIDI220240523bis	9	18CIC10	193	47	838	278	130	103	1.01107	25.904	49	-0.819606	0.00230222	8.10222	0.00417971	6.82668	0.0271715	33.7459	0.171054	-54.6199	3.29089	-0.284033	17.196	-68.6789	0.60037	-5.80608	-5.81684		Included
PB-2_clumpedLIDI220240523bis	10	BTCARB11	158	35	506	271	123	113	1.01371	30.6469	41	-1.24248	0.00176885	8.89371	0.00392053	7.08809	0.0206546	187.645	0.478373	-108.977	3.4366							Y	Rejected	Sample pressure too low (<600 microbar).
PB-2_clumpedLIDI220240523bis	11	BTCARB10	108	83	819	359	123	103	1.01212	24.0643	51	-1.48378	0.00196898	8.40893	0.00526903	6.40598	0.0230968	44.6617	0.188814	-73.5484	4.7051	-0.314903	27.3119	-87.2244	0.571961	-6.53332	-5.50578		Included
PB-2_clumpedLIDI220240523bis	12	18CIC11	121	71	792	212	120	106	1.01156	21.58	55	-1.93993	0.00183069	7.44778	0.00443309	4.98881	0.0290647	221.831	0.947454	-160.576	3.3485	-0.315111	203.833	-171.013	0.578194	-6.98925	-6.47477		Included
PB-2_clumpedLIDI220240523bis	13	BDH	112	100	941	344	123	106	1.01102	40.5545	30	6.56619	0.00281987	12.0466	0.00236171	18.1101	0.0211171	34.7649	0.525998	-22.5868	1.83547	-0.57682	10.2774	-51.9534	0.261539	2.00788	-1.85289		Included
PB-2_clumpedLIDI220240523bis	14	ETH-1	86	100	860	212	120	106	1.01308	28.55	41	6.65221	0.00220569	11.8354	0.0038995	17.9451	0.024838	95.6217	0.324928	-87.2676	3.2723	-0.621733	70.1409	-114.408	0.218176	2.10843	-2.06633		Included
PB-2_clumpedLIDI220240523bis	15	IAEA-603	84	100	836	315	125	106	1.01119	26.1232	44	7.04736	0.00178225	11.6673	0.00451526	18.3399	0.0281674	43.3522	0.262716	-72.7132	3.67773	-0.47554	19.4256	-100.369	0.359971	2.54056	-2.23685		Included
PB-2_clumpedLIDI220240523bis	16	ETH-4	86	100	809	198	120	106	1.01068	22.5939	48	-5.43104	0.00203772	-5.06671	0.00413327	-11.0397	0.0276602	114.941	0.618942	-100.678	3.52097	-0.488625	126.326	-86.3689	0.480585	-10.2855	-19.0969		Included
PB-2_clumpedLIDI220240523bis	17	18CIC10	196	47	850	300	152	106	1.01349	27.133	47	-0.817144	0.0014396	8.13086	0.00298992	6.83243	0.0226489	40.1556	0.32244	-64.2202	2.66915							Y	Rejected	Software or hardware error during the acquisition and/or non steady signal through the acquisition process
PB-2_clumpedLIDI220240523bis	18	BTCARB11	158	62	897	220	120	108	1.01339	32.7083	39	-1.53169	0.00175266	8.02849	0.00337413	6.0013	0.0209814	359.689	2.7563	-191.298	1.8409	-0.296636	338.117	-202.604	0.59174	-6.57082	-5.88963		Included
PB-2_clumpedLIDI220240523bis	19	BTCARB10	114	80	841	337	123	106	1.01229	25.7791	48	-1.48116	0.00166757	8.46698	0.00470496	6.44975	0.0258985	47.029	0.438118	-68.4326	3.39614	-0.330706	29.5213	-82.2905	0.55624	-6.53265	-5.4472		Included
PB-2_clumpedLIDI220240523bis	20	18CIC11	139	67	860	264	120	106	1.01202	28.0878	43	-1.91484	0.00147646	7.44465	0.00350873	4.99813	0.0252662	91.141	0.613499	-79.9857	3.29167	-0.328715	75.0743	-91.443	0.56479	-6.96209	-6.47799		Included
PB-2_clumpedLIDI220240523bis	21	BDH	80	100	794	337	125	106	1.01123	21.9862	53	6.54826	0.00241331	12.0201	0.00579404	18.1558	0.0259957	40.63	0.423607	-86.5768	3.69849	-0.487849	16.0569	-113.958	0.348718	1.98954	-1.87961		Considered as outlier	Outlier sensu peirce for raw D47 and rd48
PB-2_clumpedLIDI220240523bis	25	VIA1	84	100	826	73	120	108	1.01343	23.8853	53	-2.46996	0.0021484	7.00712	0.00462085	3.9598	0.0270088	144.566	1.34087	-149.707	2.63706	-0.36132	128.692	-159.081	0.537482	-7.54413	-6.91829		Included
PB-2_clumpedLIDI220240523bis	26	ETH-2	85	14	111	447	1236	106	0.00105342	0.0133473	100	-6.59355	0.248717	-3.46701	0.425593	-3.57074	7.2561	32769.4	861.771	-279372	7698.79							YYYY	Rejected	Sample pressure too low (<600 microbar).Bad adjustment between the belows.Non Condensable Pressure above 150 microbar.Extreme bellow position.
PB-2_clumpedLIDI220240523bis	27	ETH-3	95	100	870	190	123	108	1.01442	28.937	43	6.39871	0.00211244	12.2424	0.00276247	18.6225	0.0276283	710.092	4.61757	-748.342	87.1788	-0.092327	668.977	-755.952	0.735075	1.82012	-1.6549		Considered as outlier	Outlier sensu peirce for raw D47, rd48
PB-2_clumpedLIDI220240523bis	28	ETH-1	102	100	907	300	128	108	1.01242	33.5487	37	6.66588	0.00274164	11.7738	0.00295205	17.8956	0.0282549	362.805	2.05651	-385.776	38.2979	-0.624532	331.273	-403.977	0.215651	2.12545	-2.12853		Included
PB-2_clumpedLIDI220240523bis	29	18CIC11	118	75	814	249	123	106	1.0112	22.971	51	-1.90824	0.00281862	7.39083	0.00364326	4.97587	0.0279614	165.658	0.746064	-276.615	20.3839	-0.30519	148.617	-285.554	0.587997	-6.95298	-6.53231		Included
PB-2_clumpedLIDI220240523bis	30	BTCARB11	110	81	816	366	125	106	1.01094	23.2198	50	-1.49827	0.00251904	8.35297	0.00412327	6.34854	0.0199182	35.081	0.303885	-117.756	5.73544	-0.302448	18.0032	-130.672	0.584454	-6.54686	-5.56223		Included
PB-2_clumpedLIDI220240523bis	31	BTCARB10	138	70	882	234	120	108	1.00916	30.3623	38	-1.50189	0.00229764	8.04401	0.00327699	5.97263	0.0271576	308.199	0.801514	-193.024	1.80571	-0.371034	287.404	-204.356	0.518798	-6.53929	-5.87403		Included
PB-2_clumpedLIDI220240523bis	32	18CIC10	211	45	875	322	125	106	1.01291	28.945	39	-0.814386	0.00193454	8.10848	0.00406255	6.8247	0.0221514	34.1378	0.13883	-66.9704	2.43821	-0.297493	17.569	-80.8621	0.587158	-5.80069	-5.81053		Included
PB-2_clumpedLIDI220240523bis	33	BDH	118	100	936	220	123	108	1.01407	38.8604	34	6.55563	0.00177159	12.0414	0.00309994	18.1261	0.0215444	34.4845	0.18114	-51.7842	2.88533	-0.545171	10.0141	-80.254	0.292551	1.9967	-1.85814		Included
PB-2_clumpedLIDI220240523bis	34	ETH-4	85	100	855	352	125	106	1.01347	26.7119	46	-5.41011	0.00213284	-5.03861	0.0038085	-11.0291	0.0207161	-2.06751	0.151594	-54.3141	3.73233	-0.527324	8.06535	-39.3424	0.442526	-10.264	-19.0686		Included
PB-2_clumpedLIDI220240523bis	35	ETH-1	85	100	853	198	120	106	1.01101	27.4295	44	6.65484	0.00240887	11.8348	0.00516277	17.9386	0.0261908	76.8385	0.292953	-84.422	5.12217	-0.630257	51.7956	-111.649	0.209833	2.11128	-2.0669		Included
PB-2_clumpedLIDI220240523bis	36	18CIC11	122	74	828	337	125	106	1.01227	24.4583	49	-1.92278	0.0017355	7.43145	0.00395406	4.96288	0.0262971	22.3802	0.130972	-73.6533	3.91536	-0.342699	7.35235	-85.1582	0.551215	-6.97016	-6.49129		Included
PB-2_clumpedLIDI220240523bis	37	BTCARB11	112	79	816	198	123	108	1.01054	23.0793	50	-1.49672	0.00179896	8.43922	0.00379305	6.40512	0.0269724	92.3315	0.158745	-107.598	4.12333	-0.33191	74.1254	-120.811	0.55526	-6.54839	-5.47518		Included
PB-2_clumpedLIDI220240523bis	38	BTCARB10	149	65	889	440	128	108	1.01296	30.6485	38	-1.50505	0.00155686	8.04141	0.0031093	6.02178	0.0242408	22.4516	0.117187	-59.3615	3.72984	-0.316395	6.20396	-72.5618	0.572241	-6.5426	-5.87665		Included
PB-2_clumpedLIDI220240523bis	39	18CIC10	195	46	831	337	123	108	1.01228	24.4209	46	-0.856244	0.00215966	8.164	0.00490048	6.84528	0.0258612	101.763	0.170403	-109.622	3.73052	-0.287967	83.9914	-122.934	0.596421	-5.84787	-5.75441		Included
PB-2_clumpedLIDI220240523bis	40	BDH	114	100	941	344	128	108	1.01401	39.2297	30	6.57085	0.00130333	12.0455	0.00272666	18.13	0.0211076	30.2469	0.277188	-48.7795	2.07975	-0.560888	5.8687	-77.3615	0.277097	2.01295	-1.8541		Included
PB-2_clumpedLIDI220240523bis	41	ETH-1	82	100	838	227	123	108	1.01275	25.2438	50	6.64664	0.00218956	11.8164	0.00469426	17.9234	0.0253953	110.596	0.326245	-109.539	2.96334	-0.618916	84.8079	-135.98	0.22104	2.10313	-2.08546		Included
PB-2_clumpedLIDI220240523bis	42	ETH-2	115	100	943	330	130	111	1.01649	37.4264	34	-5.27782	0.00142157	-4.6353	0.00236209	-10.7582	0.0157854	2.25664	0.331481	-33.7002	2.11054	-0.788913	11.6131	-19.3225	0.184366	-10.1365	-18.6618		Included
PB-2_clumpedLIDI220240523bis	43	ETH-3	96	100	880	234	125	108	1.01574	29.7129	42	6.38226	0.00163766	12.3498	0.00431974	18.5938	0.0223762	38.1786	0.267264	-77.5395	3.07261	-0.207903	13.0034	-105.607	0.621688	1.79841	-1.54652		Included
PB-2_clumpedLIDI220240523bis	44	BTCARB10	118	79	858	352	128	108	1.01165	26.5452	45	-1.48434	0.00212307	8.4371	0.00457877	6.41831	0.0248345	21.9372	0.236464	-71.8213	3.73458	-0.329535	4.90862	-85.5725	0.557533	-6.53497	-5.47735		Included
PB-2_clumpedLIDI220240523bis	45	18CIC10	216	6	120	513	120	106	0.00970812	0.110323	100	-6.97348	0.140455	-2.08904	0.27036	-8.09415	0.622147	594.659	13.6733	-12826	266.663							YYYY	Rejected	Sample pressure too low (<600 microbar).Bad adjustment between the belows.leak rate above 500 microbar/min.Extreme bellow position.
PB-2_clumpedLIDI220240523bis	46	BTCARB11	150	66	914	337	130	111	1.01488	33.0539	36	-1.47885	0.00412594	8.03296	0.00738491	1.91209	0.555284	0.93249	2.62579	-1687.62	856.813								Rejected	Software or hardware error during the acquisition and/or non steady signal through the acquisition process
PB-2_clumpedLIDI220240523bis	47	18CIC11	122	72	809	264	125	111	1.01051	21.6054	53	-1.92247	0.0035504	7.43707	0.0091562	5.91472	0.459786	74.6958	2.48714	-176.263	82.853								Rejected	Software or hardware error during the acquisition and/or non steady signal through the acquisition process
PB-2_clumpedLIDI220240523bis	48	IAEA-603	105	100	907	330	132	111	1.01434	31.6749	37	7.02882	0.00213092	11.6724	0.0031747	18.2796	0.0216261	29.0761	0.301562	-62.6398	2.72197	-0.520691	5.46678	-90.5873	0.315898	2.52039	-2.23166		Included
PB-2_clumpedLIDI220240523bis	49	BDH	107	100	936	212	128	113	1.01508	35.6934	37	6.5702	0.00224996	12.0835	0.00440011	18.2454	0.0228351	42.3533	0.221419	-58.8541	2.97658	-0.483863	17.6121	-87.2003	0.352225	2.01084	-1.81567		Considered as outlier	Outlier sensu peirce for raw D47 and rd48
PB-20_clumpedLIDI220250117	1	ETH-3	96	99	797	88	108	84	1.03779	23.0186	52	6.48868	0.00932806	12.4654	0.0254391	18.6707	0.0428635	43.7416	0.762841	35.806	8.74519	-0.353678	18.199	3.95099	0.43536	1.78111	-1.64506	Y	Considered as outlier	First sample of of the carousel is always spurious
PB-20_clumpedLIDI220250117	3	ETH-3	99	94	777	103	103	84	1.03873	22.132	52	6.40746	0.00209922	12.3285	0.00714807	18.616	0.0261913	32.6648	0.136612	-30.667	8.90844	-0.191194	7.66576	-60.1472	0.615302	1.69976	-1.77902	Y	Included
PB-20_clumpedLIDI220250117	4	ETH-3	105	91	797	271	98	84	1.0373	24.8223	46	6.4145	0.0020358	12.3453	0.0045902	18.5851	0.0248892	27.5023	0.142783	-27.7353	8.30756	-0.245081	2.59485	-57.3424	0.555851	1.70663	-1.76253	Y	Included
PB-20_clumpedLIDI220250117	5	ETH-3	99	94	775	271	98	81	1.05435	22.804	50	6.40313	0.00229408	12.3705	0.00921422	18.6075	0.0279563	34.3451	0.154074	-45.7084	8.72061	-0.235879	9.22165	-74.8023	0.565925	1.69361	-1.73785	Y	Included
PB-20_clumpedLIDI220250117	6	ETH-1	80	100	736	37	96	79	1.06584	19.6038	57	6.69515	0.00305312	11.887	0.00963092	17.9867	0.0286223	59.0497	0.246298	-103.488	10.924	-0.675007	34.3138	-130.273	0.083167	2.02182	-2.21212		Considered as outlier	Outlier sensu peirce for raw D47.
PB-20_clumpedLIDI220250117	7	ETH-2	94	100	767	271	93	81	1.03617	21.8705	49	-5.33592	0.00188084	-4.91874	0.00542478	-11.1951	0.0269227	5.56398	0.153428	7.17983	11.7367	-0.890364	15.5296	22.8016	-0.020123	-10.1542	-18.6488		Considered as outlier	Outlier sensu peirce for raw D47.
PB-20_clumpedLIDI220250117	8	ETH-3	106	100	806	242	96	81	1.03586	27.0752	40	6.42911	0.00227981	12.4124	0.00827778	18.644	0.0299421	34.8502	0.156739	-84.908	9.13557	-0.267376	9.63078	-112.903	0.530924	1.7197	-1.69683		Included
PB-20_clumpedLIDI220250117	9	ETH-4	85	100	748	212	93	81	1.03957	20.3434	56	-5.37846	0.00176488	-5.0428	0.00529701	-10.9886	0.0285077	2.30967	0.155357	-24.4342	10.4633	-0.515029	12.4955	-9.0148	0.394001	-10.1949	-18.7702		Included
PB-20_clumpedLIDI220250117	10	BTCARB09	117	77	753	190	96	81	1.01635	19.8675	56	-1.65605	0.00248338	8.49611	0.0104991	6.36879	0.0294816	100.787	0.256526	-172.049	9.26506	-0.258787	82.3176	-184.259	0.597155	-6.73437	-5.51538		Included
PB-20_clumpedLIDI220250117	11	BTCARB19	169	50	704	212	101	81	1.07241	16.8403	68	-0.665787	0.00258945	11.7107	0.0121087	10.6357	0.0309751	725.792	5.5116	-716.341	4.94635	-0.179457	686.071	-722.56	0.665164	-5.79907	-2.36846		Considered as outlier	Bad sample batch for all the session (wrong sample ?)
PB-20_clumpedLIDI220250117	12	BTCARB05-T	160	59	789	44	98	84	1.03759	23.9231	47	-1.69693	0.00173215	8.30292	0.00454874	6.17233	0.0204958	168.301	2.69116	-213.772	4.51547	-0.223454	149.139	-225.042	0.637137	-6.77075	-5.70454		Included
PB-20_clumpedLIDI220250117	14	ETH-1	82	100	770	249	101	89	1.03788	20.2419	58	6.72153	0.00438376	11.8998	0.00949083	18.2036	0.0338186	271.603	0.714367	-303.993	7.05549	-0.50154	241.871	-324.823	0.273999	2.0494	-2.19962		Included
PB-20_clumpedLIDI220250117	15	POL2	80	100	775	278	108	89	1.02071	19.5712	58	-2.66149	0.00202673	7.01345	0.00486162	4.00531	0.0300791	52.8805	0.305364	-199.865	7.43774	-0.124065	38.2657	-208.533	0.757066	-7.74915	-6.9656		Included
PB-20_clumpedLIDI220250117	17	BTCARB09	120	78	784	227	101	89	1.04121	21.0756	54	-1.65099	0.0023069	8.35974	0.00686819	6.27442	0.0279331	398.57	2.28693	-406.855	4.34931	-0.224868	375.476	-415.451	0.635102	-6.72399	-5.64898		Included
PB-20_clumpedLIDI220250117	18	BTCARB05-T	160	61	814	176	106	89	1.03692	23.6429	48	-1.68404	0.00225588	8.27315	0.00585526	6.14049	0.0231058	315.223	1.40778	-326.862	4.082	-0.2394	293.728	-336.481	0.61965	-6.75595	-5.73373		Included
PB-20_clumpedLIDI220250117	19	ETH-2	97	100	826	403	106	91	1.02641	24.3757	45	-5.36193	0.00188316	-5.01347	0.00421288	-11.0883	0.0266775	45.9724	0.180332	-119.794	6.50698	-0.661929	56.5396	-105.949	0.232007	-10.1784	-18.7415		Included
PB-20_clumpedLIDI220250117	20	IAEA-603	115	100	880	154	108	89	1.03382	31.6458	35	7.08101	0.00167168	11.6512	0.00545924	18.4051	0.0223011	44.7264	0.199445	-105.326	5.16437	-0.430409	20.8007	-132.013	0.351732	2.44076	-2.44393		Included
PB-20_clumpedLIDI220250117	22	ETH-3	95	100	819	168	108	91	1.03969	23.9902	50	6.40257	0.00257463	12.3424	0.00617996	18.6953	0.0250343	55.8146	0.222457	-142.223	7.06292	-0.12192	30.2267	-168.329	0.691545	1.69405	-1.76532		Considered as outlier	Outlier sensu peirce for raw D47, rd48
PB-20_clumpedLIDI220250117	23	BTCARB09	120	72	728	205	108	91	1.03821	15.9957	71	-1.6724	0.002387	8.41865	0.00538072	6.36755	0.0313675	212.624	0.666906	-346.626	6.35139	-0.167635	192.462	-356.153	0.697965	-6.74891	-5.59122		Considered as outlier	Outlier sensu peirce for raw D47.
PB-20_clumpedLIDI220250117	24	BTCARB19	165	54	750	161	111	91	1.01614	17.6046	63	-0.737339	0.0024966	11.5731	0.00610005	10.4667	0.0346191	64.0855	0.231943	-220.748	6.11504	-0.139107	39.8769	-237.57	0.710569	-5.87012	-2.50308		Considered as outlier	Bad sample batch for all the session (wrong sample ?)
PB-20_clumpedLIDI220250117	25	BTCARB05-T	163	60	814	366	106	86	1.03708	24.1631	48	-1.6266	0.00194904	8.26866	0.0042102	6.27074	0.0234699	431.885	1.80383	-410.933	3.0594	-0.164955	408.496	-419.382	0.701376	-6.69471	-5.73825		Considered as outlier	Outlier for rd48
PB-20_clumpedLIDI220250117	26	ETH-2	103	100	819	198	98	89	1.03343	24.4034	46	-5.34107	0.00228764	-4.88458	0.00952744	-11.019	0.0218419	18.1036	0.203573	-107.699	6.95321	-0.740746	28.1229	-93.9156	0.144523	-10.161	-18.6153		Included
PB-20_clumpedLIDI220250117	27	ETH-1	87	100	782	242	106	91	1.04386	20.5394	54	6.68225	0.00300702	11.8283	0.0107264	18.0441	0.0274217	263.644	0.672592	-325.592	5.45652	-0.54852	234.273	-345.658	0.222783	2.01025	-2.26955		Included
PB-20_clumpedLIDI220250117	28	ETH-3	93	100	811	278	101	91	1.03373	22.9768	48	6.38836	0.00175661	12.3616	0.00664493	18.7318	0.024281	63.6337	0.182144	-173.563	6.80391								Rejected	Software or hardware error during the acquisition and/or non steady signal through the acquisition process
PB-20_clumpedLIDI220250117	29	BTCARB19	164	54	748	212	111	89	1.03761	17.4472	61	-0.664018	0.00204018	11.8049	0.00626077	10.7517	0.0358334	227.832	0.770812	-332.678	6.04099	-0.158016	199.349	-347.429	0.688341	-5.80064	-2.27621		Considered as outlier	Bad sample batch for all the session (wrong sample ?)
PB-20_clumpedLIDI220250117	30	BTCARB05-T	168	59	831	176	106	86	1.03766	26.1962	46	-1.63222	0.00158235	8.32087	0.00541735	6.2305	0.0261121	37.5258	0.294994	-110.446	5.74376	-0.250015	20.4726	-123.288	0.607495	-6.70261	-5.6871		Included
PB-20_clumpedLIDI220250117	31	BTCARB09	119	78	782	271	101	86	1.04057	20.8128	55	-1.64705	0.00177659	8.48132	0.00488848	6.41169	0.0278804	199.086	0.561847	-284.742	7.22069	-0.211073	179.002	-295.277	0.649723	-6.72425	-5.52988		Included
PB-20_clumpedLIDI220250117	33	IAEA-603	118	100	855	366	106	84	1.03191	31.6389	37	7.10972	0.00191513	11.7916	0.00603246	18.4898	0.0252037	65.7263	0.188225	-119.64	7.07682	-0.51312	41.0307	-146.159	0.259871	2.46615	-2.30645		Included
PB-20_clumpedLIDI220250117	34	ETH-3	101	100	802	220	101	84	1.04297	24.7044	46	6.42366	0.00216991	12.4072	0.0069952	18.7278	0.0274277	48.1168	0.127256	-135.852	8.75339	-0.174555	22.5845	-162.276	0.633186	1.7141	-1.70189		Considered as outlier	Outlier sensu peirce for raw D47, rd48
PB-20_clumpedLIDI220250117	36	BTCARB19	160	52	694	190	103	84	0.996451	15.585	66	-0.661316	0.00245511	11.8334	0.00573535	10.7414	0.0267198	45.4853	0.161509	-242.432	10.222	-0.19867	21.1744	-259.221	0.643428	-5.79881	-2.24826		Considered as outlier	Bad sample batch for all the session (wrong sample ?)
PB-20_clumpedLIDI220250117	37	BTCARB05-T	182	55	833	264	106	84	1.03118	28.7459	38	-1.64137	0.00279302	8.394	0.0128239	6.14797	0.0228656	44.8093	0.190668	-81.9228	3.36351	-0.39383	27.4874	-95.2967	0.448833	-6.71501	-5.61544		Considered as outlier	Outlier sensu peirce for raw D47.
PB-21_clumpedLIDI220250120	1	ETH-3	95	78	648	212	98	74	1.0214	14.5228	78	6.42729	0.00201549	12.3183	0.00460281	18.5415	0.0342654	27.8945	0.16933	54.2583	7.07836	-0.274812	3.03101	22.1939	0.515329	1.74956	-1.76265	Y	Considered as outlier	First sample of of the carousel is always spurious
PB-21_clumpedLIDI220250120	3	ETH-3	92	96	765	198	89	79	1.03839	23.6526	48	6.49566	0.00531451	12.1795	0.00478928	18.768	0.0265208	48.9501	1.1768	8787.34	893.532	0.012332	23.8582	8491.53	0.809157	1.82752	-1.89898	Y	Considered as outlier	Outlier sensu peirce for raw D47, rd49
PB-21_clumpedLIDI220250120	4	ETH-3	104	88	792	198	89	79	1.01343	26.0409	42	6.38904	0.00359035	12.2926	0.00715656	18.5448	0.030615	27.5791	0.300149	-3253.94	7015.49	-0.207424	2.77423	-3185.58	0.584552	1.70973	-1.78783	Y	Included
PB-21_clumpedLIDI220250120	7	ETH-2	98	100	787	330	108	81	1.03847	24.6572	47	-5.28209	0.0100959	-4.70748	0.0365338	-11.0124	0.0331747	-8.58315	0.135605	278.572	18.4692								Rejected	Software or hardware error during the acquisition and/or non steady signal through the acquisition process
PB-21_clumpedLIDI220250120	9	ETH-4	94	100	760	330	96	91	1.03742	19.3353	59	-5.35081	0.0054537	-4.95842	0.0107155	-10.9498	0.0374533	-7.06529	0.157872	95.3828	4.06225	-0.58781	2.85515	112.478	0.351193	-10.1683	-18.6776		Considered as outlier	Outlier sensu peirce for raw D47.
PB-21_clumpedLIDI220250120	10	BTCARB24	135	70	828	271	96	84	1.03637	26.3811	44	-2.86637	0.00184361	8.17001	0.00552774	4.80499	0.0239887	16.4396	0.118897	23.7274	9.75978	-0.244264	0.032249	10.577	0.620062	-8.00401	-5.80974		Included
PB-21_clumpedLIDI220250120	12	BTCARB05-T	180	51	799	564	91	81	1.03615	25.8725	44	-1.66199	0.00184482	8.36424	0.00656903	6.09727	0.0272844	16.8241	0.115286	31.5085	9.1149	-0.393887	0.025191	16.5637	0.459425	-6.72744	-5.62196	Y	Considered as outlier	leak rate above 500 microbar/min. Outlier sensu peirce for raw D47.
PB-21_clumpedLIDI220250120	13	IAEA-603	90	100	763	271	101	79	1.06776	22.9269	50	7.09451	0.00194057	11.7698	0.00495231	18.3936	0.0254216	23.698	0.124107	-33.7345	14.1225	-0.570741	0.019345	-62.7864	0.212055	2.48084	-2.30198		Considered as outlier	Outlier sensu peirce for raw D47.
PB-21_clumpedLIDI220250120	14	ETH-1	83	100	738	190	86	79	1.05273	20.6635	54	6.69152	0.00232105	11.9147	0.00619119	17.9687	0.0316076	71.1871	1.89498	-61.5216	14.5568	-0.715883	46.1104	-89.6059	0.065191	2.04599	-2.15901		Considered as outlier	Outlier sensu peirce for raw D47, rd46
PB-21_clumpedLIDI220250120	15	VIA2	83	100	738	190	96	79	1.04284	20.0678	54	-2.35367	0.00223448	4.6389	0.00748764	1.82672	0.0255845	14.5747	0.283987	26.5346	15.2916	-0.293846	5.22672	19.7993	0.585019	-7.3277	-9.2734		Included
PB-21_clumpedLIDI220250120	17	BTCARB24	119	73	753	300	98	79	1.04014	21.9248	53	-2.86477	0.00174591	8.16644	0.0050644	4.70965	0.0291374	18.114	0.190856	-33.6994	10.0422	-0.337288	1.68673	-46.1071	0.524989	-8.00218	-5.81325		Considered as outlier	Outlier sensu peirce for raw D47.
PB-21_clumpedLIDI220250120	18	BTCARB05-T	160	54	753	564	93	79	1.05829	21.9523	53	-1.6457	0.00184365	8.41689	0.00576363	6.23452	0.0254019	18.1244	0.147553	-35.3571	10.6171	-0.325679	1.19952	-49.4473	0.528776	-6.71201	-5.57036	Y	Considered as outlier	leak rate above 500 microbar/min. Outlier sensu peirce for raw D47.
PB-21_clumpedLIDI220250120	21	VIA2	106	87	802	462	96	76	1.03988	27.9257	41	-2.68087	0.00200351	7.18907	0.00531097	3.9996	0.0288865	15.4543	0.135012	-16.8984	11.8797	-0.281089	1.00991	-27.8618	0.586525	-7.77025	-6.77204		Included
PB-21_clumpedLIDI220250120	22	ETH-3	104	100	789	418	86	76	1.05235	26.2246	43	6.41404	0.00193572	12.3809	0.00539167	18.7245	0.0271675	25.1975	0.110411	-39.8904	10.5435	-0.142482	0.275453	-69.1914	0.65032	1.73314	-1.70123		Included
PB-21_clumpedLIDI220250120	23	BTCARB24	110	75	721	403	89	76	1.03987	19.1012	56	-2.86047	0.00145998	8.14522	0.00462193	4.79797	0.0316683	17.0953	0.153986	-48.8099	12.6073	-0.233182	0.72664	-60.9891	0.631486	-7.99681	-5.83407		Included
PB-21_clumpedLIDI220250120	25	BTCARB05-T	164	54	772	249	96	76	1.0373	23.9591	49	-1.70447	0.00185687	8.24804	0.00483326	6.13276	0.0287091	17.6416	0.125156	-12.5235	10.5779	-0.20149	1.05985	-26.5658	0.656922	-6.76844	-5.7358		Included
PB-21_clumpedLIDI220250120	27	ETH-1	89	100	758	601	96	76	1.0387	22.6017	51	6.62942	0.00165625	11.7892	0.00370304	17.9801	0.0303344	65.0392	1.26629	-105.55	12.0791	-0.519237	40.3645	-132.048	0.267182	1.9844	-2.28195	Y	Included	leak rate above 500 microbar/min.
PB-21_clumpedLIDI220250120	28	ETH-3	88	100	738	593	91	76	1.05821	20.5546	55	6.39621	0.00216027	12.3117	0.00483643	18.667	0.0256291	29.0403	0.234851	-74.5138	12.6307	-0.113351	4.16226	-102.621	0.680558	1.71667	-1.76911	Y	Considered as outlier	leak rate above 500 microbar/min. Outlier sensu peirce for raw D47.
PB-21_clumpedLIDI220250120	30	BTCARB05-T	160	54	760	608	91	79	1.035	22.5807	48	-1.65497	0.00178527	8.33483	0.00501306	6.20257	0.0289196	18.0416	0.143254	-61.0132	9.88644	-0.267877	1.28099	-74.5715	0.588338	-6.71887	-5.65081	Y	Included	leak rate above 500 microbar/min.
PB-21_clumpedLIDI220250120	31	BTCARB24	124	71	765	344	98	79	1.0636	22.8589	48	-2.86462	0.00217059	8.08618	0.00566212	4.70043	0.025167	17.5462	0.106514	-58.1708	10.3738	-0.26839	1.28752	-70.119	0.595831	-7.99906	-5.89195		Included
PB-21_clumpedLIDI220250120	33	IAEA-603	100	100	784	227	101	79	1.03825	25.6562	46	7.07161	0.00170967	11.6624	0.00635441	18.3978	0.0265928	24.5727	0.123956	-42.5796	10.8292	-0.438765	1.08647	-71.1492	0.347637	2.46037	-2.40731		Included
PB-21_clumpedLIDI220250120	34	ETH-3	85	100	731	579	96	79	1.04069	19.7877	58	6.38133	0.00243518	12.4007	0.0101729	18.6683	0.0337771	25.3662	0.115814	-98.3268	10.4881	-0.18329	0.401096	-125.848	0.608691	1.69755	-1.6818	Y	Included	leak rate above 500 microbar/min.
PB-21_clumpedLIDI220250120	35	BTCARB24	122	72	767	447	98	79	1.03655	23.1348	49	-2.87027	0.0020801	8.0925	0.00663282	4.6913	0.031533	18.1233	0.125001	-65.5545	9.51082	-0.277785	1.84286	-77.4149	0.586226	-8.00532	-5.88574		Included
PB-21_clumpedLIDI220250120	37	BTCARB05-T	180	52	819	425	98	79	1.03694	29.4019	39	-1.70384	0.0016107	8.22554	0.0037823	6.07121	0.0266315	19.0518	0.129344	-39.0511	10.0223	-0.24136	2.49189	-52.6753	0.616285	-6.76694	-5.75787		Included
PB-21_clumpedLIDI220250120	38	ETH-2	110	100	811	418	89	79	1.02337	28.0633	39	-5.35766	0.00147	-4.96872	0.00349723	-11.0645	0.0289048	-8.18208	0.100684	-5.67549	10.4891	-0.686435	1.74794	9.87008	0.250469	-10.1752	-18.6877		Included
PB-21_clumpedLIDI220250120	39	POL2	108	86	806	388	98	79	1.0171	27.6484	39	-2.26424	0.00172267	4.57821	0.00452614	1.96087	0.0256193	10.5013	0.0936635	-27.9233	12.7943	-0.193092	1.31183	-34.279	0.687826	-7.23014	-9.3331		Included
PB-21_clumpedLIDI220250120	40	ETH-4	10	100	794	777	91	76	1.05177	26.3289	40	-5.40691	0.0017361	-5.06566	0.00464038	-11.001	0.0258678	-8.66705	0.108584	-49.4714	13.9395	-0.475516	1.45323	-34.3748	0.466848	-10.2241	-18.7827	Y	Included	leak rate above 500 microbar/min.
PB-21_clumpedLIDI220250120	44	ETH-1	82	100	738	227	89	76	1.021	20.4672	55	6.66631	0.00206305	11.8318	0.00508906	17.9211	0.0253628	45.7025	0.454287	32.1208	13.2242	-0.656236	21.3899	1.42222	0.126732	2.02216	-2.24031		Included
PB-21_clumpedLIDI220250120	45	ETH-2	107	100	787	344	98	74	1.03699	26.4329	43	-5.34781	0.00171028	-4.9481	0.00344981	-11.1316	0.0217815	-4.44754	0.148618	67.7038	14.6352	-0.784797	5.47822	84.341	0.149762	-10.1655	-18.6675		Included
PB-21_clumpedLIDI220250120	46	ETH-3	103	100	770	330	84	74	1.04707	25.6683	45	6.41269	0.00187028	12.3273	0.00397151	18.6057	0.0291999	27.3471	0.17754	-30.5791	9.20772	-0.205546	2.47904	-60.065	0.586156	1.73366	-1.75382		Included
PB-22_clumpedLIDI220250122	1	ETH-3	80	100	802	125	125	101	1.03794	19.5227	60	6.40096	0.00692755	12.3492	0.0163644	18.492	0.0366305	27.3916	0.203916	163.21	23.5583	-0.326379	2.47918	127.796	0.460236	1.6974	-1.71324	Y	Considered as outlier	First sample of of the carousel is always spurious
PB-22_clumpedLIDI220250122	2	ETH-3	97	100	868	66	128	93	1.03695	23.3643	49	6.42634	0.0017183	12.3664	0.00516783	18.6872	0.0232119	24.8853	0.105821	25.4184	9.296	-0.177494	-0.000359	-5.86055	0.620438	1.72393	-1.69626	Y	Included
PB-22_clumpedLIDI220250122	3	ETH-3	102	93	811	315	108	86	1.03137	24.1435	47	6.41001	0.00183092	12.2346	0.00675603	18.5819	0.0273424	27.8981	0.111483	-8.29521	5.36109	-0.136149	3.20049	-38.2831	0.665815	1.71131	-1.8265	Y	Included
PB-22_clumpedLIDI220250122	4	ETH-3	100	94	806	601	101	86	1.05966	24.4132	47	6.41738	0.0021457	12.3246	0.00402265	18.5658	0.0296209	26.2233	0.0860322	1.65701	4.57004							YY	Rejected	leak rate above 500 microbar/min. Outlier for all parameters
PB-22_clumpedLIDI220250122	5	ETH-3	83	100	770	755	1192	91	1.07083	20.5681	54	6.36449	0.00183781	12.1993	0.00341179	18.468	0.0285246	24.4955	0.111622	-3.82193	8.52329	-0.166995	-0.0506	-33.8324	0.633034	1.66389	-1.86128	YYY	Included	leak rate above 500 microbar/min.Non Condensable Pressure above 150 microbar.
PB-22_clumpedLIDI220250122	6	ETH-1	85	100	782	308	98	86	1.01477	21.5812	49	6.68089	0.00224392	11.8218	0.00436344	18.0359	0.0268288	47.7794	0.861852	-23.9429	8.24463	-0.548803	23.4386	-52.9703	0.221821	2.01642	-2.23505		Included
PB-22_clumpedLIDI220250122	7	ETH-2	103	100	836	974	1275	93	1.03454	26.3651	40	-5.33239	0.00176578	-4.89725	0.00737021	-11.0383	0.0238382	-9.25084	0.119233	43.4799	8.50356	-0.756774	0.524748	59.6158	0.158595	-10.2228	-18.7322	YY	Included	leak rate above 500 microbar/min.Non Condensable Pressure above 150 microbar.
PB-22_clumpedLIDI220250122	8	ETH-3	100	100	826	615	101	86	1.01507	25.8772	40	6.41426	0.00170815	12.3551	0.00393524	18.6765	0.0287589	24.6677	0.11606	-10.4579	8.91404	-0.16465	-0.190358	-40.6091	0.634412	1.71141	-1.70742	Y	Included	leak rate above 500 microbar/min.
PB-22_clumpedLIDI220250122	9	ETH-4	87	100	794	484	721	89	1.03932	21.949	53	-5.23629	0.00210595	-4.89669	0.00471612	-10.6083	0.0258972	-9.23141	0.100424	45.4518	9.57868	-0.422467	0.543245	61.5077	0.51836	-10.12	-18.7319	Y	Considered as outlier	Non Condensable Pressure above 150 microbar. Outlier sensu peirce for raw D47.
PB-22_clumpedLIDI220250122	12	BTCARB05-T	165	58	831	711	103	89	1.03764	25.8317	44	-1.63051	0.00189229	8.30354	0.00571239	6.2204	0.0245314	16.5674	0.0924184	-12.8407	7.30613	-0.244928	-0.106878	-27.0607	0.616881	-6.74931	-5.69369	Y	Included	leak rate above 500 microbar/min.
PB-22_clumpedLIDI220250122	13	IAEA-603	108	100	853	432	660	89	1.03759	28.5572	40	7.07688	0.00154381	11.6742	0.00401268	18.4009	0.0271724	23.3977	0.0978415	-17.7649	7.64899	-0.4526	-0.084881	-47.102	0.324006	2.44567	-2.38188	Y	Included	Non Condensable Pressure above 150 microbar.
PB-22_clumpedLIDI220250122	14	ETH-1	80	100	760	557	98	89	1.03949	18.9263	57	6.67504	0.00206997	11.8264	0.00399093	18.036	0.0286335	35.935	0.570892	-42.7075	10.6016	-0.547094	11.8602	-71.1794	0.223672	2.00999	-2.23055	Y	Included	leak rate above 500 microbar/min.
PB-22_clumpedLIDI220250122	15	POL2	99	98	836	608	1080	91	1.03571	25.7306	42	-2.0539	0.0014711	4.68904	0.00434375	2.30812	0.0271881	9.65534	0.131167	-3.35708	7.5988	-0.172517	0.252867	-10.3104	0.717134	-7.069	-9.26508	YY	Included	leak rate above 500 microbar/min.Non Condensable Pressure above 150 microbar.
PB-22_clumpedLIDI220250122	18	BTCARB05-T	160	59	819	264	101	89	1.0366	23.7619	49	-1.65742	0.00186855	8.38434	0.00500107	6.23027	0.0257679	16.7093	0.118193	-26.4202	6.7212	-0.286077	-0.127561	-40.5681	0.572249	-6.78109	-5.61377		Included
PB-22_clumpedLIDI220250122	19	ETH-2	80	100	784	322	111	89	1.03822	20.345	55	-5.16312	0.00161788	-4.6928	0.00566195	-10.5711	0.0289503	-9.27012	0.115126	9.51681	9.9666	-0.662025	0.094286	24.5279	0.258634	-10.0492	-18.5305	Y	Included
PB-22_clumpedLIDI220250122	20	IAEA-603	108	100	853	256	101	89	1.03571	28.4468	40	7.08463	0.00160014	11.7282	0.00419292	18.4352	0.0244583	23.3739	0.100259	-17.2694	8.13477	-0.479386	-0.214959	-46.7293	0.294797	2.45197	-2.32847		Included
PB-22_clumpedLIDI220250122	21	VIA2	96	100	833	667	108	89	1.06449	25.6147	45	-2.53698	0.00211562	7.26643	0.00613522	4.25828	0.024881	14.935	0.106771	-20.5366	8.13733	-0.247856	0.344299	-31.7545	0.624646	-7.6812	-6.71667	Y	Included	leak rate above 500 microbar/min.
PB-22_clumpedLIDI220250122	22	ETH-3	87	100	787	652	103	89	1.03972	21.0087	52	6.41377	0.00182552	12.3949	0.00459578	18.7072	0.0315253	24.6514	0.118786	-30.1015	10.5883	-0.172648	-0.284871	-59.7264	0.625576	1.70942	-1.66811	Y	Included	leak rate above 500 microbar/min.
PB-22_clumpedLIDI220250122	27	ETH-2	105	100	836	73	111	86	1.03817	27.2815	43	-5.19573	0.0187656	-4.52687	0.0496146	-10.969	0.0334165	-4.46867	0.302366	358.645	76.429								Rejected	Software or hardware error during the acquisition and/or non steady signal through the acquisition process
PB-22_clumpedLIDI220250122	28	ETH-1	107	96	877	168	118	86	1.03678	31.5871	37	6.69918	0.00279672	11.7851	0.00888159	17.9747	0.0262953	47.1017	0.160397	-325.659	88.4251	-0.591982	22.8508	-345.679	0.175386	2.03735	-2.27137	Y	Included
PB-22_clumpedLIDI220250122	29	ETH-3	93	100	797	308	103	86	1.04037	23.6347	48	6.41758	0.00259034	12.2914	0.00842517	18.6127	0.0274725	35.23	0.471776	-789.943	193.394	-0.168764	10.2429	-796.319	0.630311	1.71732	-1.77042		Included
PB-22_clumpedLIDI220250122	31	BTCARB05-T	160	58	802	264	101	84	1.03782	23.7569	46	-1.66065	0.00223083	8.3356	0.00507364	6.07749	0.0256001	18.7232	0.115441	61.5261	10.4111	-0.387023	1.94987	46.2032	0.463744	-6.78274	-5.66194		Considered as outlier	Outlier sensu peirce for raw D47.
PB-22_clumpedLIDI220250122	33	ETH-1	102	100	821	264	106	86	1.03598	25.7326	42	6.69286	0.0017185	11.8898	0.00462519	18.0534	0.0263847	205.062	3.17763	-143.358	8.8492	-0.609937	176.91	-168.954	0.155497	2.02672	-2.16787		Included
PB-22_clumpedLIDI220250122	34	IAEA-603	80	100	760	396	111	86	1.03822	19.8111	52	7.07768	0.00170805	11.6589	0.00466055	18.3984	0.028739	36.1639	0.529932	-3.93694	13.3327	-0.441021	12.419	-33.6593	0.336563	2.44709	-2.39699		Included
PB-22_clumpedLIDI220250122	35	ETH-3	104	100	828	300	106	86	1.03821	26.69	44	6.42289	0.00199144	12.3755	0.00455329	18.6863	0.0273552	29.4519	0.269278	-0.463177	8.75471	-0.183784	4.43722	-30.9663	0.61363	1.7199	-1.68724		Included
PB-22_clumpedLIDI220250122	36	BTCARB26	351	21	640	410	106	86	1.08942	11.7902	100	-0.732629	0.00264306	11.2442	0.00580766	10.1199	0.0366798	27.2434	0.199948	-76.2532	11.8443							Y	Rejected	Extreme bellow position.
PB-22_clumpedLIDI220250122	38	BTCARB05-T	18	100	777	359	111	86	1.01668	20.3221	54	-1.67938	0.00211261	8.24767	0.00492499	6.07167	0.0242567	18.4421	0.178277	-21.4431	8.28824	-0.287762	1.84806	-35.3838	0.571307	-6.79955	-5.74879		Included
PB-22_clumpedLIDI220250122	39	ETH-2	98	100	814	220	106	86	1.03706	23.4265	47	-5.3456	0.00173562	-4.93446	0.00448356	-10.9954	0.0228915	-7.89626	0.104293	8.95499	7.5315	-0.662943	1.96762	24.6467	0.260004	-10.2356	-18.769		Included
PB-22_clumpedLIDI220250122	40	VIA2	84	100	777	359	111	89	1.07204	20.3672	55	-1.6969	0.00249326	5.11406	0.00697386	3.08814	0.0327716	12.0921	0.134629	-19.8875	8.63097								Rejected	Software or hardware error during the acquisition and/or non steady signal through the acquisition process
PB-22_clumpedLIDI220250122	41	ETH-4	102	100	880	300	108	89	1.03036	30.9554	35	-3.88038	0.0012819	-2.90769	0.00366854	-7.3251	0.0227924	2.73027	0.288471	16.0147	6.11341	-0.477989	8.58703	26.0879	0.43991	-8.7426	-16.7691		Included
PB-22_clumpedLIDI220250122	43	BTCARB05-T	160	58	804	264	111	91	1.0395	22.3178	53	-1.67151	0.00226293	8.29624	0.00955799	6.09761	0.0257534	18.3118	0.119111	-9.12199	5.12344	-0.317464	1.62343	-23.3389	0.538986	-6.79292	-5.70081		Included
PB-22_clumpedLIDI220250122	45	ETH-1	88	100	809	249	111	91	1.0416	21.7578	53	6.66516	0.00190944	11.8001	0.00406477	18.0844	0.0246885	108.31	1.32299	-100.724	6.94927	-0.463926	82.6092	-127.416	0.3135	2.00038	-2.25653		Considered as outlier	Outlier sensu peirce for raw D47.
PB-22_clumpedLIDI220250122	47	ETH-3	93	100	802	227	103	86	1.03862	23.4214	50	6.48089	0.00859722	12.4682	0.00997385	18.8893	0.0666369	31.9673	0.218455	33.9017	10.6323							Y	Rejected	Software or hardware error during the acquisition and/or non steady signal through the acquisition process
PB-23_clumpedLIDI220250124	1	ETH-3	106	85	802	183	120	74	1.04145	27.7361	43	6.56706	0.0163542	12.664	0.0388273	18.736	0.0365979	29.3813	0.117282	336.915	1116.27							Y	Rejected	First sample of of the carousel is always spurious
PB-23_clumpedLIDI220250124	3	ETH-3	98	92	804	667	101	84	1.04156	25.343	45	6.56386	0.00693375	12.3087	0.00763395	18.8853	0.0411248	41.9657	0.731483	6610.56	702.717							YYY	Rejected	leak rate above 500 microbar/min.
PB-23_clumpedLIDI220250124	4	ETH-3	98	92	806	220	103	84	1.03567	24.752	45	6.41213	0.00308779	12.336	0.00414216	18.569	0.0283348	26.0213	0.160502	-1764.91	897.534	-0.249453	1.16813	-1741.63	0.542836	1.71841	-1.74471	Y	Considered as outlier	Outlier sensu peirce for raw D47.
PB-23_clumpedLIDI220250124	5	ETH-3	97	93	806	740	106	84	1.03465	24.3166	45	6.40196	0.00284615	12.323	0.00676674	18.5538	0.025173	24.6474	0.0901144	120.611	9.1352	-0.241273	-0.146814	86.5478	0.551457	1.70806	-1.75752	YY	Considered as outlier	leak rate above 500 microbar/min.
PB-23_clumpedLIDI220250124	6	ETH-1	85	100	770	227	103	86	1.00173	20.7188	49	6.66532	0.00263138	11.8687	0.00929606	18.0283	0.0267657	60.3374	2.52759	51.904	18.6361	-0.585917	35.6088	20.5448	0.194769	2.00495	-2.20477		Included
PB-23_clumpedLIDI220250124	7	ETH-2	97	100	809	681	101	86	1.03633	23.6582	44	-5.3528	0.00212686	-4.89821	0.0082462	-11.0552	0.0273562	-6.75259	0.319416	70.558	16.2004	-0.751704	3.04958	87.1384	0.184782	-10.1676	-18.665	Y	Included	leak rate above 500 microbar/min.
PB-23_clumpedLIDI220250124	8	ETH-3	84	100	770	249	103	86	1.03706	20.3401	51	6.40128	0.00169166	12.3218	0.00551057	18.6528	0.0284578	25.328	0.199824	4.82224	13.955	-0.142297	0.519669	-25.7183	0.654184	1.70738	-1.75865		Included
PB-23_clumpedLIDI220250124	9	ETH-4	101	100	828	410	108	86	1.03561	25.6	45	-5.40732	0.00193256	-5.05279	0.0095107	-11.0175	0.0292146	-8.97175	0.159119	59.2295	11.659	-0.504439	1.11953	76.0257	0.442592	-10.2199	-18.8169		Included
PB-23_clumpedLIDI220250124	10	BTCARB24	111	78	770	234	108	89	1.04181	19.7235	57	-2.88188	0.00260807	8.15089	0.0109254	4.71349	0.0290251	16.4295	0.110962	-3.73435	12.1031	-0.300626	0.060263	-16.4791	0.567098	-8.01829	-5.83928		Included
PB-23_clumpedLIDI220250124	13	IAEA-603	90	100	811	447	118	89	1.01446	21.9901	51	7.08133	0.00241083	11.7466	0.0081595	18.406	0.0274933	23.6815	0.125454	-39.4943	9.40064	-0.52249	0.049197	-68.3179	0.258837	2.4521	-2.32579		Included
PB-23_clumpedLIDI220250124	14	ETH-1	80	100	767	286	103	89	1.06829	19.2076	60	6.68207	0.00247974	11.8713	0.00610585	18.0415	0.0312869	53.4006	2.00113	-63.2595	9.46744	-0.592535	28.8287	-91.2061	0.187789	2.02268	-2.20234		Included
PB-23_clumpedLIDI220250124	15	VIA2	97	96	833	425	111	89	1.03557	25.146	45	-2.67259	0.00146186	7.18358	0.00799665	4.03678	0.0277179	16.8842	0.214556	-12.8015	7.06971	-0.247279	2.43034	-23.8088	0.626558	-7.76009	-6.79091		Included
PB-23_clumpedLIDI220250124	17	BTCARB24	122	74	802	366	113	89	1.03682	21.853	50	-2.85905	0.00193023	8.13661	0.00771426	4.79779	0.0286883	17.1549	0.119182	-33.4028	7.92696	-0.226437	0.802323	-45.7648	0.644041	-7.99347	-5.85337		Included
PB-23_clumpedLIDI220250124	19	ETH-2	91	100	804	418	113	89	1.03097	21.756	48	-5.35652	0.00219532	-4.92933	0.00809	-11.0798	0.0267848	-8.92697	0.0996824	-4.29222	8.71755	-0.742008	0.916344	11.1951	0.195039	-10.1704	-18.6956		Included
PB-23_clumpedLIDI220250124	20	IAEA-603	115	100	877	308	289	91	1.03443	31.1718	38	7.07533	0.00166137	11.6773	0.00502567	18.3861	0.021446	23.8848	0.115676	-5.04006	6.85463	-0.468602	0.384917	-34.7615	0.315181	2.44826	-2.39397	Y	Included	Non Condensable Pressure above 150 microbar.
PB-23_clumpedLIDI220250124	21	VIA2	93	98	816	425	115	91	1.04088	23.2287	49	-2.65693	0.00230884	7.2125	0.00479882	4.07509	0.0297138	14.748	0.0978819	-21.2819	9.29922	-0.253548	0.267128	-32.2654	0.619802	-7.74449	-6.76251		Included
PB-23_clumpedLIDI220250124	22	ETH-3	85	100	782	242	101	89	1.0654	20.4428	56	6.38899	0.0020152	12.3246	0.0067233	18.615	0.025289	24.4523	0.120411	-48.7399	9.66307	-0.169517	-0.340247	-77.6454	0.625991	1.6942	-1.75595		Included
PB-23_clumpedLIDI220250124	23	BTCARB24	114	77	789	403	113	89	1.02487	20.7758	53	-2.88912	0.00214248	8.02221	0.00744651	4.55331	0.0329893	16.1492	0.115173	-35.5603	8.79075	-0.327078	0.039712	-47.6517	0.540392	-8.02128	-5.9658		Included
PB-23_clumpedLIDI220250124	26	ETH-2	94	100	814	278	108	89	1.03468	23.359	46	-5.3447	0.00190961	-4.84706	0.00784076	-10.9839	0.0261951	-9.14051	0.0934631	4.57601	8.74818	-0.738575	0.535232	20.0226	0.198084	-10.1608	-18.6148		Included
PB-23_clumpedLIDI220250124	28	ETH-3	92	100	797	205	111	86	1.03989	22.605	52	6.42029	0.00211135	12.3974	0.00759903	18.7311	0.0271818	25.4398	0.110753	-46.3463	7.56941	-0.158376	0.479314	-75.4859	0.636967	1.72484	-1.68435		Included
PB-23_clumpedLIDI220250124	31	BTCARB24	118	76	799	432	103	89	1.01968	22.3375	49	-2.85929	0.00195617	8.16051	0.00704427	4.70059	0.0231497	16.5766	0.10589	-32.4443	7.91669	-0.346206	0.185872	-44.8628	0.519607	-7.99461	-5.82987		Considered as outlier	Outlier sensu peirce for raw D47.
PB-23_clumpedLIDI220250124	32	ETH-1	81	100	758	322	2850	89	1.03862	18.8574	58	6.67856	0.00218504	11.8244	0.00547335	18.0678	0.0394591	89.9912	2.12038	-115.802	9.52964	-0.517578	64.6644	-142.1	0.265859	2.02066	-2.24843	Y	Included	Non Condensable Pressure above 150 microbar.
PB-23_clumpedLIDI220250124	33	IAEA-603	86	100	799	344	113	86	1.03544	22.9311	48	7.09047	0.00228204	11.7428	0.00733904	18.4427	0.026336	28.4732	0.233123	-51.8906	8.33262	-0.492165	4.7379	-80.3443	0.290276	2.46197	-2.32958		Included
PB-23_clumpedLIDI220250124	34	ETH-3	80	100	750	256	106	86	1.03894	18.8079	56	6.41475	0.00188748	12.3494	0.0057593	18.6455	0.0246944	26.7947	0.17337	-64.2581	10.3967	-0.19	1.89632	-92.7605	0.604446	1.72071	-1.73161		Included
PB-23_clumpedLIDI220250124	35	BTCARB24	165	48	711	381	115	86	1.06747	15.7706	68	-0.663501	0.00238187	11.7583	0.00861765	10.6333	0.0338735	25.1079	0.132161	-84.0401	10.2517	-0.230296	1.4195	-104.206	0.607306	-5.78985	-2.29707		Included
PB-23_clumpedLIDI220250124	38	ETH-2	85	100	763	322	98	86	1.00585	19.1551	56	-5.35481	0.00209857	-4.88139	0.00420542	-10.9877	0.0266117	-8.90929	0.105183	-23.0993	9.1621	-0.698035	0.837781	-8.00027	0.240408	-10.1703	-18.6485		Included
PB-23_clumpedLIDI220250124	39	VIA2	90	98	789	374	111	89	1.01055	21.8949	50	-2.68234	0.00170686	7.17724	0.00475315	4.01629	0.0255845	15.4401	0.107985	-29.2168	9.54739	-0.25141	1.01938	-40.0192	0.622362	-7.77024	-6.79712		Included
PB-23_clumpedLIDI220250124	40	ETH-4	80	100	753	308	98	89	1.03899	18.2674	59	-5.39613	0.00229648	-4.9965	0.00693366	-10.9352	0.0293835	-9.32648	0.103812	-13.594	9.97387	-0.488519	0.647964	1.92405	0.458743	-10.2101	-18.7616		Included
PB-23_clumpedLIDI220250124	43	BTCARB24	148	54	711	469	115	86	1.03462	15.6061	66	-0.507131	0.00209561	10.6501	0.00542377	9.78175	0.0324933	22.4925	0.115756	-71.9875	9.9643	-0.157465	1.05618	-90.6145	0.688078	-5.58286	-3.38705		Considered as outlier	Outlier sensu peirce for raw D47 and raw stable isotope data
PB-23_clumpedLIDI220250124	44	ETH-1	90	100	782	293	98	89	1.04117	21.314	55	6.68906	0.00183937	11.8601	0.00428553	18.0499	0.0302453	56.599	1.19704	-53.7622	8.16747	-0.580614	31.9753	-81.9789	0.200181	2.03052	-2.21334		Included
PB-23_clumpedLIDI220250124	45	ETH-2	96	100	814	476	113	89	1.03948	23.2617	49	-5.36901	0.00174863	-5.00766	0.0039307	-11.1004	0.0255202	-6.32542	0.143655	-9.94654	8.3606	-0.672509	3.70175	5.62182	0.267676	-10.1808	-18.7726		Included
PB-23_clumpedLIDI220250124	46	ETH-3	80	100	750	256	106	89	1.03783	18.3498	61	6.39741	0.0022863	12.3021	0.00526001	18.638	0.031396	26.2664	0.135151	-64.0809	9.17351	-0.133766	1.47433	-92.4888	0.663169	1.70399	-1.77804		Included
PB-24_clumpedLIDI220250128	1	ETH-3	100	91	797	44	101	84	1.03994	25.4851	47	6.50242	0.00793178	12.4792	0.0155139	18.7264	0.0514343	28.7067	0.350817	149.671	30.2991	-0.326566	3.50459	114.268	0.477071	1.8018	-1.61532	Y	Considered as outlier	First sample of of the carousel is always spurious
PB-24_clumpedLIDI220250128	2	ETH-3	95	97	811	110	101	84	1.04664	24.0149	49	6.40651	0.00158766	12.3442	0.00542455	18.5953	0.022871	23.6814	0.132591	48.3573	6.76137	-0.22581	-1.13115	16.4438	0.59835	1.7046	-1.74785	Y	Included
PB-24_clumpedLIDI220250128	3	ETH-3	99	93	804	344	106	84	1.02587	24.8086	46	6.4033	0.00242599	12.325	0.00640614	18.5392	0.0273103	24.7709	0.112447	-9.79469	7.34268	-0.25901	-0.030152	-39.8989	0.558955	1.70188	-1.76669	Y	Included
PB-24_clumpedLIDI220250128	4	ETH-3	106	89	824	256	101	84	1.01801	26.6217	42	6.41485	0.00233234	12.3409	0.00862753	18.5525	0.0252007	24.8463	0.126539	2.68348	5.63102	-0.273168	0.011981	-27.842	0.541941	1.7136	-1.75107	Y	Included
PB-24_clumpedLIDI220250128	5	ETH-3	101	92	819	308	106	84	1.04851	25.5706	44	6.41708	0.00242151	12.3386	0.00467653	18.5741	0.026849	24.7987	0.109009	-13.7911	7.30067	-0.252002	-0.029859	-43.813	0.567139	1.71607	-1.75339	Y	Included
PB-24_clumpedLIDI220250128	7	ETH-2	96	100	802	623	101	84	1.0415	24.0257	44	-5.3484	0.00224988	-4.89216	0.00901685	-11.1558	0.0258175	-8.30674	0.115974	-5.42568	8.61031	-0.863937	1.46793	9.96107	0.0047	-10.1805	-18.6666	Y	Considered as outlier	leak rate above 500 microbar/min.
PB-24_clumpedLIDI220250128	8	ETH-3	98	100	802	234	101	84	1.05627	24.3734	44	6.38458	0.00185647	12.3033	0.00459686	18.5905	0.025864	25.0076	0.116047	-8.83118	5.55609	-0.168374	0.243642	-38.9052	0.667087	1.68274	-1.78799		Considered as outlier	Outlier sensu peirce for raw D47.
PB-24_clumpedLIDI220250128	9	ETH-4	94	100	792	322	103	84	1.04055	23.2306	50	-5.38649	0.00205704	-5.02004	0.00740492	-10.9799	0.0234111	-8.67133	0.103728	24.8427	8.49389	-0.520425	1.35708	41.0031	0.414633	-10.2163	-18.7922		Included
PB-24_clumpedLIDI220250128	12	BTCARB05-T	160	57	804	161	101	86	1.04	23.9069	47	-1.69058	0.00160473	8.28266	0.0045237	6.07654	0.0247627	16.9149	0.115916	-23.6828	6.43924	-0.305454	0.276355	-37.6457	0.574492	-6.76998	-5.72264		Included
PB-24_clumpedLIDI220250128	13	IAEA-603	85	100	782	293	111	86	1.06193	21.3914	53	7.06736	0.00238889	11.66	0.00869156	18.4213	0.023157	23.1594	0.134984	-38.6795	7.93098	-0.409082	-0.289645	-67.3569	0.380099	2.43348	-2.42193		Included
PB-24_clumpedLIDI220250128	14	ETH-1	80	100	755	212	103	86	1.05506	19.0362	57	6.66735	0.00225571	11.7924	0.00588036	18.0357	0.0348343	63.7095	0.697368	-77.5964	8.62716	-0.50651	39.059	-104.964	0.265747	2.00262	-2.29087		Included
PB-24_clumpedLIDI220250128	15	POL2	100	94	824	315	108	86	1.03898	25.1563	43	-2.27501	0.00160424	4.55773	0.00383576	1.94377	0.0264532	12.0926	0.120494	-18.2518	5.86854	-0.178973	2.92961	-24.6205	0.749377	-7.25555	-9.3833		Included
PB-24_clumpedLIDI220250128	18	BTCARB05-T	164	57	828	322	465	89	1.03818	25.361	46	-1.6529	0.00228601	8.30351	0.0145173	6.0171	0.0426191	16.8011	0.210885	-6.84185	4.62419							Y	Rejected	Software or hardware error during the acquisition and/or non steady signal through the acquisition process
PB-24_clumpedLIDI220250128	19	ETH-2	86	100	792	623	892	91	1.03912	20.7161	54	-5.36341	0.00255041	-4.99227	0.00752169	-11.0655	0.0266111	-9.66831	0.115436	-22.1924	6.81751	-0.658275	0.29419	-6.85277	0.250215	-10.1928	-18.765	YY	Included	leak rate above 500 microbar/min.Non Condensable Pressure above 150 microbar.
PB-24_clumpedLIDI220250128	20	IAEA-603	90	100	797	176	274	89	1.02827	21.6097	52	7.08761	0.00221024	11.698	0.00478889	18.4325	0.0284048	23.2761	0.111513	-59.7931	6.86805	-0.455745	-0.250858	-87.9276	0.324212	2.45366	-2.38457	Y	Included	Non Condensable Pressure above 150 microbar.
PB-24_clumpedLIDI220250128	21	POL2	84	84	618	388	111	89	0.991116	10.3723	100	-2.29571	0.00232091	4.55264	0.00653976	1.89058	0.0359305	8.93994	0.156397	-108.313	10.3476							Y	Rejected	Extreme bellow position.
PB-24_clumpedLIDI220250128	22	ETH-3	82	100	775	293	662	91	1.04259	19.5837	56	6.38524	0.00184612	12.3311	0.00553544	18.7003	0.0291507	24.4535	0.14979	-62.2347	5.72452	-0.088316	-0.352023	-90.7382	0.762233	1.68242	-1.7606	Y	Considered as outlier	Non Condensable Pressure above 150 microbar. Outlier sensu peirce for raw D47.
PB-24_clumpedLIDI220250128	25	BTCARB05-T	160	59	824	322	106	91	1.04142	23.3374	51	-1.65967	0.00180383	8.26075	0.00516095	6.11552	0.0218257	18.0583	0.122827	-37.4577	4.64166	-0.277305	1.4446	-51.2144	0.607944	-6.73625	-5.74425		Included
PB-24_clumpedLIDI220250128	26	ETH-2	87	100	804	190	111	91	1.06098	20.9107	55	-5.30539	0.00175622	-4.82831	0.00586152	-10.9088	0.0261425	-9.18759	0.137327	-35.3482	7.03964	-0.722005	0.450005	-20.593	0.173082	-10.137	-18.6039		Included
PB-24_clumpedLIDI220250128	27	ETH-1	95	100	828	806	1219	96	1.03888	23.4738	49	6.67486	0.00214582	11.8323	0.00391918	18.0415	0.0258445	58.0296	0.535432	-76.9487	6.22978	-0.547301	33.4294	-104.412	0.216917	2.00915	-2.2517	YY	Included	leak rate above 500 microbar/min.Non Condensable Pressure above 150 microbar.
PB-24_clumpedLIDI220250128	28	ETH-3	80	100	760	315	223	91	1.03612	17.7611	62	6.41013	0.00192869	12.3266	0.00501173	18.7794	0.0288693	25.8361	0.114548	-76.9321	7.57989	-0.031746	1.00606	-105.004	0.829455	1.7091	-1.76514	Y	Considered as outlier	Non Condensable Pressure above 150 microbar. Outlier sensu peirce for raw D47.
PB-24_clumpedLIDI220250128	30	BTCARB05-T	160	58	819	190	223	86	1.03586	24.2288	46	-1.67278	0.00159786	8.3184	0.00301365	6.12966	0.0209447	17.3726	0.111064	-49.3709	6.97847	-0.305893	0.655597	-63.0494	0.573665	-6.75233	-5.68754	Y	Included	Non Condensable Pressure above 150 microbar.
PB-24_clumpedLIDI220250128	32	ETH-1	80	100	753	190	103	84	1.03697	19.4646	55	6.69278	0.00254683	11.9435	0.00872332	18.1176	0.0290786	154.162	1.28467	-217.04	11.2557	-0.598967	127.079	-240.513	0.154675	2.02416	-2.14239		Included
PB-24_clumpedLIDI220250128	33	IAEA-603	114	100	833	381	108	81	1.04052	29.2279	41	7.09644	0.00168124	11.6965	0.00541355	18.3795	0.0214521	28.7225	0.145767	-60.2491	9.48303	-0.515347	5.07331	-88.3759	0.253214	2.46312	-2.38605		Included
PB-24_clumpedLIDI220250128	34	ETH-3	103	100	797	286	91	79	1.06602	26.0384	46	6.43446	0.00273678	12.4277	0.0113076	18.6891	0.0245176	26.9974	0.124458	-104.461	17.4145	-0.243434	1.93911	-131.889	0.576731	1.73131	-1.6658		Included
PB-24_clumpedLIDI220250128	37	BTCARB05-T	177	54	836	352	106	84	1.03625	28.0266	40	-1.65347	0.00207393	8.36889	0.00382973	6.12037	0.0257646	17.8582	0.0937816	-5.76414	9.3773	-0.384279	1.033	-20.1868	0.479946	-6.73362	-5.63795		Considered as outlier	Outlier sensu peirce for raw D47 and rd46.
PB-24_clumpedLIDI220250128	38	ETH-2	89	100	784	278	101	84	1.03671	21.6537	49	-5.34134	0.00211096	-4.88044	0.00458514	-11.022	0.0262624	-8.83092	0.0982033	-14.097	12.8431	-0.747567	0.914996	1.12483	0.143148	-10.1734	-18.6551		Included
PB-24_clumpedLIDI220250128	39	POL2	83	100	760	359	106	84	1.06052	19.61	54	-2.14639	0.00210632	4.73145	0.00546897	2.25738	0.029841	10.0648	0.106273	-44.7587	13.4401	-0.169019	0.574058	-51.4082	0.759496	-7.12495	-9.2128		Included
PB-24_clumpedLIDI220250128	40	ETH-4	86	100	770	667	98	84	1.01726	20.185	50	-5.38402	0.00177158	-4.9973	0.00348076	-10.8796	0.0266033	-9.84467	0.113971	14.7764	13.7586	-0.444109	0.126151	30.729	0.505356	-10.2145	-18.7699	Y	Considered as outlier	leak rate above 500 microbar/min.
PB-24_clumpedLIDI220250128	42	BTCARB05-T	175	55	853	264	106	86	1.03617	29.2818	40	-1.64046	0.00248995	8.42095	0.00791552	6.34066	0.0338661	17.5575	0.0981987	-13.9735	3.84477								Rejected	Software or hardware error during the acquisition and/or non steady signal through the acquisition process
PB-24_clumpedLIDI220250128	44	ETH-1	96	100	799	344	96	84	1.03671	23.2198	48	6.69295	0.00190436	11.8755	0.00357642	18.1549	0.0301683	195.648	1.5004	-161.94	8.09225	-0.496407	167.748	-186.959	0.277153	2.02684	-2.20924		Included
PB-24_clumpedLIDI220250128	45	ETH-2	100	100	821	432	108	86	1.01578	24.7806	43	-5.34597	0.00190611	-4.91665	0.00397111	-11.0074	0.0318289	-0.191876	0.176975	-14.7208	8.20723	-0.692353	9.71246	0.56793	0.209116	-10.177	-18.6907		Included
PB-24_clumpedLIDI220250128	46	ETH-3	84	100	775	315	106	86	1.03762	20.8138	52	6.38547	0.00184565	12.2757	0.00378471	18.6815	0.0262082	28.7126	0.16181	-63.8493	8.5189	-0.053215	3.91377	-92.2062	0.804331	1.6847	-1.81507		Considered as outlier	Outlier sensu peirce for raw D47.
PB-25_clumpedLIDI2202501230	1	ETH-3	106	85	797	117	111	108	1.04112	22.0516	53	6.58995	0.00719415	12.8611	0.018789	18.98	0.0258861	27.9301	0.136887	131.727	23.2602							YY	Rejected	First sample of of the carousel is always spurious
PB-25_clumpedLIDI2202501230	2	ETH-3	94	98	814	176	111	89	1.02183	23.0455	49	6.39858	0.00224993	12.3361	0.00828001	18.5306	0.0307789	24.5052	0.139032	-10.9547	5.06999	-0.273374	-0.311385	-41.0396	0.536631	1.70804	-1.76131	Y	Considered as outlier	Outlier sensu peirce for raw D47.
PB-25_clumpedLIDI2202501230	3	ETH-3	81	100	753	388	106	86	1.03707	18.5668	60	6.38739	0.00220705	12.2907	0.00568432	18.5411	0.02597	24.5373	0.128297	-30.206	8.75072	-0.207462	-0.190415	-59.6113	0.60852	1.69779	-1.8059	Y	Included
PB-25_clumpedLIDI2202501230	4	ETH-3	106	88	828	322	386	86	1.03686	25.8162	44	6.38822	0.00210129	12.3527	0.0036032	18.5994	0.0231563	24.5384	0.138044	-2.67497	6.66871	-0.211341	-0.311903	-33.0323	0.603925	1.69641	-1.74493	YY	Included	Non Condensable Pressure above 150 microbar. Outlier sensu peirce for raw D47.
PB-25_clumpedLIDI2202501230	5	ETH-3	86	100	809	366	111	86	1.05872	23.466	48	6.3958	0.00178645	12.3791	0.00628676	18.6121	0.0262989	25.3437	0.130685	-51.5162	5.99377	-0.232253	0.421839	-80.4413	0.581018	1.70351	-1.71906	Y	Included
PB-25_clumpedLIDI2202501230	6	ETH-1	86	100	806	300	274	86	1.0253	23.9015	45	6.67227	0.00193626	11.7949	0.00483317	17.9936	0.0298612	102.41	0.709559	-53.9832	7.20384	-0.555346	76.8574	-82.0608	0.232126	2.01939	-2.29383	Y	Included	Non Condensable Pressure above 150 microbar. Outlier sensu peirce for raw D47.
PB-25_clumpedLIDI2202501230	7	ETH-2	84	100	758	432	108	86	1.03864	18.9201	55	-5.35795	0.00171965	-4.94023	0.00397719	-11.0652	0.0244953	-1.25291	0.141386	10.7811	10.4577	-0.714972	8.68873	26.5265	0.237313	-10.1784	-18.7134		Included
PB-25_clumpedLIDI2202501230	8	ETH-3	80	100	733	256	103	86	1.04781	17.7832	59	6.38025	0.00207951	12.3281	0.00440121	18.6364	0.0321778	27.4665	0.125493	-26.083	11.1872	-0.142958	2.59397	-55.6747	0.678348	1.68881	-1.76913		Considered as outlier	Outlier sensu peirce for raw D47.
PB-25_clumpedLIDI2202501230	9	ETH-4	91	100	792	344	111	89	1.04178	21.4433	54	-5.39706	0.00185194	-5.07254	0.0043742	-11.0357	0.0232703	-7.53493	0.113224	34.0173	7.86856	-0.514002	2.61078	50.4432	0.456525	-10.2152	-18.8433		Included
PB-25_clumpedLIDI2202501230	10	BTCARB08-T	112	79	787	278	106	86	1.03202	21.2222	54	-1.75077	0.00191284	8.45258	0.00413507	6.25441	0.0299657	17.9263	0.129916	-25.2613	8.2613	-0.232138	0.93383	-39.4579	0.657456	-6.8295	-5.55967		Included
PB-25_clumpedLIDI2202501230	11	BTCARB09-T	122	73	789	396	235	86	1.06728	21.6396	54	-1.67854	0.0019331	8.40984	0.00476172	6.22157	0.025531	17.7749	0.117861	-21.0617	6.61668	-0.29775	0.86982	-35.3136	0.586032	-6.751	-5.60183	Y	Included	Non Condensable Pressure above 150 microbar.
PB-25_clumpedLIDI2202501230	12	BTCARB24	119	75	792	293	103	86	1.02513	21.8208	51	-2.88789	0.00219327	8.04832	0.0052837	4.6208	0.030783	16.8136	0.132729	-17.6367	6.97176	-0.286646	0.64178	-30.0034	0.608039	-8.02583	-5.95442		Included
PB-25_clumpedLIDI2202501230	13	IAEA-603	93	100	804	535	689	89	1.02371	23.172	47	7.08182	0.00176325	11.7165	0.00365152	18.4367	0.0283839	23.5144	0.117341	-25.2208	7.15002	-0.463612	-0.054594	-54.418	0.329533	2.45848	-2.37173	YY	Included	leak rate above 500 microbar/min.Non Condensable Pressure above 150 microbar.
PB-25_clumpedLIDI2202501230	14	ETH-1	88	100	787	264	106	89	1.05309	21.7443	51	6.66813	0.00220586	11.8059	0.00621303	18.0076	0.0269432	76.3516	0.546643	-61.1533	7.47659	-0.548099	51.3801	-89.0336	0.239951	2.01458	-2.28296		Included
PB-25_clumpedLIDI2202501230	15	POL2	97	94	806	330	108	89	1.015	23.1205	45	-2.29556	0.00176789	4.6036	0.00446021	1.92992	0.0220416	13.6888	0.148317	-10.2094	7.87784	-0.216427	4.41955	-16.6968	0.701312	-7.26835	-9.34102		Included
PB-25_clumpedLIDI2202501230	16	BTCARB09-T	134	68	806	293	103	86	1.03009	23.1967	45	-1.67601	0.00188663	8.41662	0.00514728	6.25591	0.0263712	18.7405	0.129685	-23.1307	7.56052	-0.272846	1.80585	-37.3678	0.613007	-6.74856	-5.59517		Included
PB-25_clumpedLIDI2202501230	17	BTCARB08-T	118	76	794	359	111	89	1.04102	22.2551	52	-1.74334	0.00170389	8.4241	0.0038661	6.19119	0.0264462	18.7393	0.104376	-8.28806	7.78347	-0.274874	1.7898	-22.6854	0.611192	-6.82054	-5.58767		Included
PB-25_clumpedLIDI2202501230	18	BTCARB24	117	76	784	242	106	89	1.00735	21.2059	52	-2.84987	0.00200994	8.181	0.00514407	4.78763	0.0279905	17.1996	0.1198	-31.2419	7.84853	-0.289325	0.758212	-43.7236	0.604084	-7.9902	-5.82411		Included
PB-25_clumpedLIDI2202501230	19	ETH-2	90	100	797	454	106	86	1.06403	21.7837	52	-5.35122	0.00221571	-4.9361	0.00486839	-11.1136	0.0326672	-8.57456	0.101021	-3.1892	7.411	-0.775028	1.28588	12.323	0.172051	-10.1714	-18.7093		Included
PB-25_clumpedLIDI2202501230	20	IAEA-603	108	100	853	286	98	89	1.03844	28.9455	40	7.0937	0.00184188	11.7429	0.00379463	18.4854	0.0254296	24.1699	0.106394	-19.0172	5.74474	-0.453605	0.53376	-48.4609	0.340157	2.47017	-2.34587		Included
PB-25_clumpedLIDI2202501230	21	POL2	99	95	831	366	111	86	1.01201	25.6585	42	-2.6565	0.00168747	7.16696	0.00374934	4.03113	0.0266161	15.3206	0.107976	-1.61508	9.40137	-0.253334	0.921974	-12.7321	0.648046	-7.74701	-6.82109		Included
PB-25_clumpedLIDI2202501230	22	ETH-3	80	100	738	293	98	86	1.03547	17.4023	61	6.40066	0.00243304	12.3763	0.00613826	18.6654	0.0332555	25.1441	0.107204	-37.3385	10.0627	-0.182216	0.232596	-66.6956	0.635313	1.70879	-1.72183		Included
PB-25_clumpedLIDI2202501230	23	BTCARB08-T	100	84	741	425	108	89	1.04961	17.4033	61	-1.73743	0.0022115	8.47406	0.00687486	6.2371	0.0244429	17.6282	0.108814	-34.5285	9.57207	-0.284058	0.598078	-48.6435	0.600883	-6.81608	-5.53859		Included
PB-25_clumpedLIDI2202501230	24	BTCARB09-T	128	70	797	315	108	89	1.03612	22.1219	48	-1.66792	0.0015416	8.47369	0.00380221	6.32246	0.0306858	17.6485	0.108423	-23.0604	7.14022	-0.270715	0.618751	-37.4139	0.614922	-6.74203	-5.5391		Included
PB-25_clumpedLIDI2202501230	25	BTCARB24	16	100	792	557	658	89	1.04313	21.6566	54	-2.87258	0.00224686	8.09207	0.00791518	4.69758	0.0302422	16.8063	0.101789	-7.41909	8.16642	-0.268737	0.547729	-20.0141	0.627116	-8.01112	-5.91146	YY	Included	leak rate above 500 microbar/min.Non Condensable Pressure above 150 microbar.
PB-25_clumpedLIDI2202501230	26	ETH-2	83	100	772	322	101	89	1.05488	19.5107	58	-5.34054	0.00228008	-4.85217	0.0051366	-10.9807	0.0303271	-9.29141	0.136712	-2.7413	9.45409	-0.734616	0.393147	12.5985	0.215346	-10.1631	-18.6269		Included
PB-25_clumpedLIDI2202501230	27	ETH-1	85	100	787	535	723	91	1.01731	21.0939	53	6.66984	0.00214563	11.8483	0.00475377	18.0881	0.0247517	113.914	0.731853	-84.5246	7.48301							YY	Rejected	leak rate above 500 microbar/min.Non Condensable Pressure above 150 microbar.
PB-25_clumpedLIDI2202501230	28	ETH-3	95	100	811	337	101	89	1.02053	22.8149	49	6.4108	0.00266787	12.3691	0.00881483	18.664	0.0278046	29.0105	0.144209	-30.7164	7.9539	-0.187014	4.01928	-60.2726	0.630084	1.71985	-1.7289		Included
PB-25_clumpedLIDI2202501230	29	BTCARB09-T	116	76	777	388	111	89	1.06939	20.2199	56	-1.67417	0.00198109	8.43687	0.00933278	6.24687	0.0316744	19.1458	0.106483	-20.2337	9.84358	-0.30347	2.16419	-34.5531	0.579632	-6.74735	-5.57527		Included
PB-25_clumpedLIDI2202501230	30	BTCARB24	110	78	763	264	106	86	1.02291	19.1299	56	-2.84899	0.00189979	8.2287	0.00362895	4.85496	0.0274818	17.6389	0.0884412	-26.7232	9.20836	-0.269741	1.0956	-39.3533	0.625048	-7.99101	-5.77724		Included
PB-25_clumpedLIDI2202501230	31	BTCARB08-T	107	79	753	403	108	86	1.0446	18.3791	58	-1.74757	0.00213211	8.49474	0.00485581	6.25003	0.0296968	18.0821	0.135268	-27.809	9.03925	-0.280876	1.00335	-42.0505	0.604277	-6.82765	-5.51824		Included
PB-25_clumpedLIDI2202501230	32	ETH-1	90	100	797	322	98	86	1.03543	22.3409	48	6.69177	0.00204349	11.9094	0.00673521	18.0719	0.0279641	72.4854	0.447589	-59.6201	8.31506	-0.609653	47.3893	-87.7522	0.172357	2.03596	-2.18131		Included
PB-25_clumpedLIDI2202501230	33	IAEA-603	92	100	809	454	108	86	1.04034	23.6448	50	7.08134	0.00188006	11.7211	0.00447846	18.4518	0.0261305	28.6871	0.155292	-9.47961	7.82585	-0.45285	4.98984	-39.1564	0.341188	2.45781	-2.3672		Included
PB-25_clumpedLIDI2202501230	34	ETH-3	105	100	831	330	101	86	1.03948	26.4084	44	6.4019	0.00203805	12.3964	0.0068581	18.6967	0.0229864	26.6871	0.103187	-29.2294	8.64036	-0.172287	1.69831	-58.8719	0.645958	1.70938	-1.70206		Included
PB-25_clumpedLIDI2202501230	35	BTCARB08-T	107	79	753	447	101	86	1.03695	18.5249	60	-1.73643	0.00197927	8.47531	0.00439567	6.1961	0.0268947	18.8091	0.0949952	-23.0646	10.5434	-0.327036	1.75674	-37.3506	0.554218	-6.81507	-5.53736		Included
PB-25_clumpedLIDI2202501230	36	BTCARB09-T	133	68	804	308	98	89	1.03735	22.9439	49	-1.67335	0.0015422	8.46292	0.00439369	6.28142	0.0265182	18.4196	0.11024	-27.6017	9.53776	-0.295378	1.39838	-41.8628	0.588252	-6.74742	-5.54968		Included
PB-25_clumpedLIDI2202501230	37	BTCARB24	135	70	833	440	113	89	1.03984	25.8522	43	-2.84083	0.001738	8.22334	0.00484576	4.84124	0.0232994	17.8683	0.0901562	-12.2659	8.49418	-0.286604	1.33196	-25.082	0.606723	-7.98213	-5.78252		Included
PB-25_clumpedLIDI2202501230	38	ETH-2	103	100	828	322	98	89	1.02465	24.7406	43	-5.34091	0.00172696	-4.85864	0.00436571	-11.0183	0.0207859	-8.62321	0.118932	5.80551	8.26771	-0.765869	1.08089	21.2902	0.181461	-10.1633	-18.6332		Included
PB-25_clumpedLIDI2202501230	39	POL2	93	96	794	418	111	86	1.00989	21.725	47	-2.17869	0.00197816	4.66274	0.00477376	2.06321	0.0284787	10.2659	0.129461	20.6582	13.2659	-0.262129	0.910097	13.7245	0.650597	-7.14605	-9.28316		Included
PB-25_clumpedLIDI2202501230	40	ETH-4	84	100	775	330	240	89	1.06276	19.6814	53	-5.38607	0.00147715	-5.01655	0.00284457	-10.9503	0.0242187	-9.34522	0.114909	-4.71235	9.83952	-0.494367	0.669373	10.9746	0.477432	-10.2055	-18.7883	Y	Included	Non Condensable Pressure above 150 microbar.
PB-25_clumpedLIDI2202501230	41	BTCARB08-T	114	76	770	337	111	89	1.03842	19.6663	59	-1.73479	0.00206307	8.45389	0.006574	6.20801	0.0266534	17.6532	0.112112	-17.033	7.77596	-0.296028	0.662694	-31.3685	0.587995	-6.81253	-5.55842		Included
PB-25_clumpedLIDI2202501230	42	BTCARB24	120	76	811	337	318	89	1.03855	23.2617	49	-2.85502	0.00185429	8.16092	0.00535381	4.70524	0.0256472	16.859	0.117193	-20.1105	8.18672	-0.346396	0.462953	-32.6924	0.54229	-7.99495	-5.84384	Y	Considered as outlier	Non Condensable Pressure above 150 microbar. Outlier sensu peirce for raw D47.
PB-25_clumpedLIDI2202501230	43	BTCARB09-T	132	69	811	315	103	89	1.02723	22.677	49	-1.68259	0.00167704	8.4094	0.0038752	6.18985	0.0246909	17.3537	0.110882	-27.9056	7.62573	-0.324641	0.456481	-42.0529	0.556871	-6.7553	-5.60226		Included
PB-25_clumpedLIDI2202501230	44	ETH-1	80	100	763	674	167	91	1.03805	18.5803	59	6.68585	0.00244515	11.8603	0.00773362	17.9833	0.0276625	69.6916	0.427785	-70.0924	7.93496	-0.642866	44.7623	-97.8195	0.136646	2.03145	-2.22955	YY	Included	leak rate above 500 microbar/min.Non Condensable Pressure above 150 microbar.
PB-25_clumpedLIDI2202501230	45	ETH-2	84	100	772	410	113	91	1.07157	18.6508	59	-5.35298	0.00207801	-4.9365	0.00523114	-11.085	0.0246457	-4.03019	0.115066	-17.857	7.77836	-0.743847	5.87625	-2.57034	0.205914	-10.1732	-18.7097		Included
PB-25_clumpedLIDI2202501230	46	ETH-3	104	100	848	308	103	93	1.04024	26.2579	42	6.40426	0.00253573	12.3866	0.00626361	18.6073	0.0199613	27.0712	0.115757	-29.8197	7.6334	-0.252982	2.09243	-59.4286	0.558418	1.71224	-1.71167		Included
PB-26_clumpedLIDI220250203	1	ETH-3	97	94	777	37	98	84	1.03742	27.52	49	6.56309	0.0238472	12.7018	0.0684527	37.6496	5.09478	140.451	32.5495	-1002.12	95.1043							YY	Rejected	First sample of of the carousel is always spurious
PB-26_clumpedLIDI220250203	2	ETH-3	106	95	853	212	98	86	1.03771	31.387	43	6.42482	0.00179569	12.3777	0.00381135	18.6249	0.022049	25.1364	0.205405	-37.441	16.5914	-0.248044	0.22238	-66.8215	0.564319	1.72755	-1.74637	Y	Included
PB-26_clumpedLIDI220250203	3	ETH-3	105	92	821	359	103	86	1.02415	30.395	43	6.40695	0.00182861	12.3157	0.00386539	18.5311	0.0232771	24.9866	0.209876	-2.15493	24.8583	-0.261692	0.19859	-32.4778	0.550386	1.71079	-1.80716	Y	Included
PB-26_clumpedLIDI220250203	4	ETH-3	96	96	784	300	93	86	1.03922	25.5898	50	6.40975	0.00221805	12.3692	0.00369795	18.6249	0.0271968	24.687	0.182613	30.0888	51.3571	-0.224393	-0.199347	-1.32051	0.589045	1.71181	-1.75466	Y	Included
PB-26_clumpedLIDI220250203	5	ETH-3	91	100	792	176	108	86	1.0248	26.3233	48	6.44739	0.00154289	12.4969	0.00411331	18.7848	0.0246238	25.681	0.188297	-95.8909	29.2482	-0.229965	0.518087	-123.711	0.582647	1.74721	-1.6294	Y	Included
PB-26_clumpedLIDI220250203	6	ETH-1	94	100	784	220	101	86	1.05297	24.6898	51	6.66994	0.00174207	11.8116	0.00389873	17.9624	0.0243238	58.7653	0.242035	-120.995	18.3954	-0.59986	34.1902	-147.109	0.198875	2.00919	-2.30265		Included
PB-26_clumpedLIDI220250203	7	ETH-2	102	100	826	293	277	89	1.03804	28.8049	42	-5.34976	0.00156267	-4.92055	0.00286993	-11.0205	0.0236188	-5.16747	0.164737	57.5414	23.9568	-0.697779	4.69547	73.964	0.200497	-10.1697	-18.7022	Y	Included	Non Condensable Pressure above 150 microbar.
PB-26_clumpedLIDI220250203	8	ETH-3	99	100	824	212	103	89	1.03083	28.5856	42	6.39694	0.00196595	12.407	0.00400098	18.7027	0.0256756	26.055	0.154025	-79.1584	15.1779	-0.1716	1.06066	-107.29	0.643961	1.6968	-1.71756		Included
PB-26_clumpedLIDI220250203	9	ETH-4	90	100	772	249	108	89	1.03625	22.3123	59	-5.37467	0.00159876	-5.01188	0.00364784	-10.8598	0.0284372	-7.68797	0.1396	24.8602	19.9534	-0.419414	2.33395	40.9908	0.490949	-10.1929	-18.7918		Included
PB-26_clumpedLIDI220250203	10	BTCARB08-T	111	82	777	242	106	89	1.02819	23.1969	56	-1.73901	0.00171741	8.5075	0.00312509	6.28279	0.0246245	17.4769	0.131423	-147.787	15.948	-0.269617	0.382918	-160.3	0.58605	-6.82047	-5.52763		Included
PB-26_clumpedLIDI220250203	14	ETH-1	96	100	814	205	106	91	1.03721	26.77	48	6.67289	0.00172828	11.8295	0.00380913	18.0822	0.0261307	81.4002	0.308212	-229.309	14.2728	-0.502697	56.2623	-252.234	0.300028	2.01167	-2.28504		Considered as outlier	Outlier sensu peirce for raw D47.
PB-26_clumpedLIDI220250203	15	VIA2	93	100	809	161	367	91	1.0527	24.8789	51	-2.65307	0.00169663	7.18052	0.00333363	4.08444	0.0247036	18.6443	0.205415	-109.136	14.1959	-0.217022	4.17157	-119.082	0.648926	-7.74474	-6.82832	Y	Included	Non Condensable Pressure above 150 microbar.
PB-26_clumpedLIDI220250203	17	BTCARB08-T	111	81	767	549	111	89	1.0361	22.0646	60	-1.74987	0.00161632	8.43057	0.00373234	6.26417	0.0247185	18.7297	0.157222	-115.54	20.4888	-0.201924	1.76747	-128.386	0.656889	-6.8292	-5.60312	Y	Considered as outlier	leak rate above 500 microbar/min. Outlier sensu peirce for raw D47.
PB-26_clumpedLIDI220250203	20	IAEA-603	106	100	831	242	106	86	1.03896	30.8223	44	7.09039	0.00170278	11.7564	0.00422895	18.4801	0.02157	23.9311	0.190471	-143.072	20.902	-0.468625	0.273608	-168.811	0.334222	2.45876	-2.35772		Included
PB-26_clumpedLIDI220250203	21	VIA2	93	100	804	564	228	86	1.03771	26.8349	48	-2.66271	0.00143377	7.16423	0.00377826	4.01558	0.0243493	15.4969	0.162063	-37.3571	34.7534	-0.259733	1.10128	-48.0647	0.604519	-7.7544	-6.84429	YY	Included	leak rate above 500 microbar/min.Non Condensable Pressure above 150 microbar.
PB-26_clumpedLIDI220250203	22	ETH-3	97	100	802	271	96	86	1.04915	26.8543	48	6.40551	0.00176451	12.3589	0.0045591	18.6463	0.0208402	25.2136	0.172479	-191.94	22.2177	-0.189108	0.334628	-216.56	0.625859	1.70767	-1.76471		Included
PB-26_clumpedLIDI220250203	23	BTCARB08-T	121	77	789	242	323	86	1.04852	24.8727	51	-1.74934	0.00182911	8.43024	0.0037899	6.20085	0.0227675	17.2377	0.162704	-161.521	23.4641	-0.265064	0.301003	-173.698	0.591105	-6.82863	-5.60345	Y	Included	Non Condensable Pressure above 150 microbar.
PB-26_clumpedLIDI220250203	26	ETH-2	80	100	758	242	98	89	1.05282	21.118	62	-5.34237	0.00202869	-4.8792	0.00381462	-10.9836	0.0261561	-8.53656	0.162221	-182.672	26.4269	-0.708989	1.20976	-170.054	0.188645	-10.1634	-18.6616		Included
PB-26_clumpedLIDI220250203	27	ETH-1	86	100	782	176	172	89	1.03794	23.9534	54	6.67324	0.00195294	11.8341	0.00437726	18.0006	0.0258985	751.49	3.13662	-2172.5	90.0047	-0.587498	710.76	-2137.61	0.211661	2.01188	-2.28059	Y	Included	Non Condensable Pressure above 150 microbar.
PB-26_clumpedLIDI220250203	28	ETH-3	106	100	828	484	96	89	1.03581	29.3456	45	6.41275	0.00159904	12.3791	0.00351838	18.6795	0.0211213	39.9206	0.824908	-214.09	14.5153	-0.183577	14.6443	-238.071	0.631523	1.71465	-1.7449		Included
PB-26_clumpedLIDI220250203	31	BTCARB08-T	106	83	745	689	1180	91	1.07003	20.584	61	-1.74808	0.00201585	8.43274	0.00334909	6.2304	0.0276487	17.3483	0.131981	-704.069	946.409	-0.239448	0.404843	-708.369	0.61778	-6.82738	-5.601	YY	Included	leak rate above 500 microbar/min.Non Condensable Pressure above 150 microbar.
PB-26_clumpedLIDI220250203	32	ETH-1	92	100	767	293	106	84	1.03646	24.022	51	6.67376	0.00178218	11.8744	0.00393638	18.0376	0.0262659	83.8529	0.323566	138.159	1493.23	-0.590899	58.5641	104.207	0.207973	2.01095	-2.24098		Included
PB-26_clumpedLIDI220250203	33	IAEA-603	91	100	750	630	1102	84	1.03818	23.1146	58	7.06924	0.00211336	11.7213	0.00399373	18.4481	0.0285867	24.9006	0.124917	302.382	67.8564	-0.444255	1.29028	263.377	0.359816	2.43752	-2.39218	YY	Included	leak rate above 500 microbar/min.Non Condensable Pressure above 150 microbar.
PB-26_clumpedLIDI220250203	34	ETH-3	106	100	802	234	98	81	1.03854	31.0631	44	6.41564	0.00158197	12.3845	0.00313405	18.6216	0.0177168	26.3743	0.180215	15.6153	1318.97	-0.248569	1.41658	-15.3882	0.563782	1.71752	-1.73961		Included
PB-26_clumpedLIDI220250203	35	BTCARB08-T	125	73	780	513	1036	86	1.05572	25.957	50	-1.75636	0.00163839	8.50076	0.00390824	6.22305	0.0240702	17.892	0.127006	-354.182	413.889	-0.304461	0.804483	-363.644	0.549835	-6.83869	-5.53421	YY	Included	leak rate above 500 microbar/min.Non Condensable Pressure above 150 microbar.
PB-26_clumpedLIDI220250203	38	ETH-2	91	100	782	234	101	84	1.02098	24.6861	49	-5.35569	0.00148253	-4.88488	0.00365696	-11.0073	0.0258564	-8.47038	0.164401	-43.4899	40.0076	-0.713501	1.28802	-28.6984	0.184013	-10.1774	-18.6672		Included
PB-26_clumpedLIDI220250203	39	VIA2	96	100	814	513	1036	91	1.03861	27.8013	44	-2.63225	0.00165609	7.21719	0.0033398	4.14511	0.023304	14.5477	0.138796	-35.7221	28.8989	-0.213939	0.060274	-46.5775	0.651931	-7.72392	-6.79236	YY	Included	leak rate above 500 microbar/min.Non Condensable Pressure above 150 microbar.
PB-26_clumpedLIDI220250203	40	ETH-4	94	100	802	190	103	89	1.05626	25.0263	48	-5.39626	0.00168319	-5.01032	0.00339357	-10.9443	0.0251413	-9.10801	0.171442	-30.704	24.1917	-0.48395	0.896436	-15.4281	0.42378	-10.2159	-18.7902		Included
PB-26_clumpedLIDI220250203	41	BTCARB08-T	100	85	723	630	921	91	1.00183	18.0766	70	-1.73421	0.00204471	8.43864	0.00372032	6.23274	0.0278396	16.6243	0.106024	-171.51	22.0012	-0.257197	-0.318765	-183.569	0.599215	-6.81283	-5.59524	YY	Included	leak rate above 500 microbar/min.Non Condensable Pressure above 150 microbar.
PB-26_clumpedLIDI220250203	43	BTCARB22	159	23	311	886	875	91	0.219059	2.68582	100	-0.930751	0.00840165	12.0518	0.0188465	10.4947	0.0951541	38.3905	0.694787	9025.93	930.56							YYYYY	Rejected	Sample pressure too low (<600 microbar).Bad adjustment between the belows.leak rate above 500 microbar/min.Non Condensable Pressure above 150 microbar.Extreme bellow position.
PB-26_clumpedLIDI220250203	44	ETH-1	93	100	799	608	826	93	1.03963	24.2664	54	6.67945	0.00178969	11.8557	0.00585345	18.0197	0.0270069	43.8779	0.183967	-84.2196	13.6235							YY	Rejected	leak rate above 500 microbar/min.Non Condensable Pressure above 150 microbar.
PB-26_clumpedLIDI220250203	45	ETH-2	87	100	811	842	748	96	1.02855	24.3905	51	-5.35087	0.00182926	-4.91275	0.0039233	-10.9841	0.0245231	-6.60436	0.162834	-56.6522	16.8612							YY	Rejected	leak rate above 500 microbar/min.Non Condensable Pressure above 150 microbar.
PB-26_clumpedLIDI220250203	46	ETH-3	88	100	797	491	909	96	1.0523	23.26	55	6.38406	0.00213206	12.3694	0.00478499	18.6356	0.0253748	24.8832	0.150952	-166.689	16.3377	-0.18773	-0.00836	-192.076	0.627338	1.68447	-1.75441	Y	Included	Non Condensable Pressure above 150 microbar.
PB-27_clumpedLIDI220250205	1	ETH-3	104	100	848	264	787	84	1.03822	33.1533	42	6.48178	0.0130535	12.4456	0.0208753	18.7295	0.0601152	28.9136	0.365862	-2500.11	309.13							YY	Rejected	First sample of of the carousel is always spurious
PB-27_clumpedLIDI220250205	3	ETH-3	96	100	775	315	770	79	1.0399	28.3605	48	6.51537	0.00614236	12.3922	0.00702845	18.9384	0.0375731	39.4129	0.607119	1439.83	128.256							YYY	Rejected	Poor temperature control at the beginning of the run.
PB-27_clumpedLIDI220250205	4	ETH-3	89	100	760	293	479	81	1.05075	26.5586	50	6.40666	0.00315457	12.3681	0.00690397	18.5392	0.0265676	29.6821	0.16215	-75.142	27.2479							YY	Rejected	Non Condensable Pressure above 150 microbar. Poor temperature control at the beginning of the run.
PB-27_clumpedLIDI220250205	5	ETH-3	100	99	797	278	682	84	1.03643	28.6461	45	6.39492	0.00263823	12.4237	0.0077948	18.5976	0.0254212	24.9079	0.105986	-156.942	5.45518	-0.288892	-0.091552	-182.722	0.538971	1.70818	-1.69636	YY	Considered as outlier	Non Condensable Pressure above 150 microbar.Outlier sensu peirce for raw D47. Poor temperature control at the beginning of the run.
PB-27_clumpedLIDI220250205	6	ETH-1	80	100	721	212	98	81	1.03543	20.0726	61	6.67347	0.00208675	11.9063	0.00838422	18.0621	0.0268791	33.1441	0.840033	-75.1957	29.4512	-0.597551	8.97469	-102.839	0.213649	2.024	-2.20515		Included	Poor temperature control at the beginning of the run.
PB-27_clumpedLIDI220250205	7	ETH-2	87	100	765	205	406	84	1.03543	23.3585	52	-5.35028	0.00190733	-4.86403	0.00898572	-11.0473	0.0234676	-8.67391	0.100922	-628.25	175.054	-0.780061	1.04054	-622.519	0.162087	-10.1723	-18.6495	Y	Considered as outlier	Non Condensable Pressure above 150 microbar. Outlier sensu peirce for raw D47, rd49. Poor temperature control at the beginning of the run.
PB-27_clumpedLIDI220250205	8	ETH-3	87	100	763	293	98	86	1.04202	23.5401	52	6.39014	0.00194063	12.4034	0.00767269	18.6443	0.0255505	23.9291	0.0978879	-473.717	137.646	-0.218478	-1.00637	-489.788	0.613557	1.70383	-1.71633		Included
PB-27_clumpedLIDI220250205	9	ETH-4	101	100	816	205	435	86	1.03721	28.5877	47	-5.37293	0.00178794	-4.98299	0.00828781	-10.9374	0.0242916	-8.12993	0.101323	253.029	59.6896	-0.528121	1.82937	272.676	0.42923	-10.192	-18.7663	Y	Included	Non Condensable Pressure above 150 microbar.
PB-27_clumpedLIDI220250205	10	BTCARB09-T	123	78	775	190	103	86	1.03995	23.6911	55	-1.6807	0.00206083	8.47593	0.00690899	6.30294	0.026823	15.8629	0.125141	89.1466	50.3433	-0.27908	-1.14138	73.1546	0.60952	-6.75311	-5.55574		Included
PB-27_clumpedLIDI220250205	11	BTCARB16	146	62	738	689	328	86	1.07178	19.8018	66	-0.766677	0.00247751	9.76814	0.00761478	8.50654	0.0288422	18.6221	0.114926	-73.1578	37.6458	-0.294817	-0.990156	-89.9499	0.582024	-5.82648	-4.28862	YY	Included	leak rate above 500 microbar/min.Non Condensable Pressure above 150 microbar.
PB-27_clumpedLIDI220250205	12	BTCARB13	156	63	794	249	101	86	1.03714	25.3059	50	-1.23322	0.00202031	7.88687	0.00625304	6.19951	0.0183112	16.1142	0.162702	-2.7697	25.1016	-0.269879	0.273911	-16.7533	0.619802	-6.25459	-6.13529		Included
PB-27_clumpedLIDI220250205	13	IAEA-603	90	100	804	190	555	89	1.0223	26.4698	47	7.08426	0.00198969	11.7616	0.00595702	18.4552	0.0243123	22.9314	0.141596	-45.0934	23.4348	-0.491776	-0.713072	-73.7788	0.32411	2.46708	-2.34826	Y	Included	Non Condensable Pressure above 150 microbar.
PB-27_clumpedLIDI220250205	14	ETH-1	95	100	806	234	98	89	1.04626	26.6705	47	6.67688	0.00176854	11.8653	0.00570094	18.0034	0.0230451	33.2237	0.783706	-72.1431	20.5284	-0.618868	9.13423	-99.8093	0.191286	2.02914	-2.24541		Included
PB-27_clumpedLIDI220250205	15	POL2	87	100	789	366	838	91	1.05755	23.9033	52	-2.22734	0.00193039	4.67732	0.00535575	2.05706	0.025598	9.74701	0.131075	-29.3401	21.2658	-0.23223	0.367014	-35.9115	0.680061	-7.19602	-9.28535	Y	Included	Non Condensable Pressure above 150 microbar.
PB-27_clumpedLIDI220250205	16	BTCARB16	159	61	782	234	103	91	1.0279	23.0251	52	-0.771141	0.00197464	9.90287	0.00569033	8.6425	0.0240253	19.5792	0.144405	-88.8963	17.6712	-0.286566	-0.318255	-105.634	0.590125	-5.83618	-4.15628		Included
PB-27_clumpedLIDI220250205	17	BTCARB09-T	111	86	772	344	660	93	1.03507	21.7014	61	-1.67927	0.00203225	8.39929	0.00604373	6.24965	0.0290304	16.9971	0.123285	1.72286	26.2544	-0.25882	0.125799	-12.8397	0.631306	-6.74876	-5.63101	Y	Included	Non Condensable Pressure above 150 microbar.
PB-27_clumpedLIDI220250205	18	BTCARB13	149	65	787	286	626	89	1.03734	24.3705	55	-1.19349	0.0017136	7.94068	0.00486454	6.25901	0.0247162	15.7001	0.153221	-62.0459	26.5054	-0.304277	-0.240494	-75.3346	0.582964	-6.21422	-6.08252	Y	Included	Non Condensable Pressure above 150 microbar.
PB-27_clumpedLIDI220250205	19	ETH-2	105	100	833	330	604	89	1.03653	30.452	44	-5.35424	0.00139639	-4.89922	0.00473649	-11.0424	0.0245129	-8.17695	0.169745	94.7627	31.876	-0.736286	1.61321	111.722	0.208574	-10.1752	-18.6841	Y	Included	Non Condensable Pressure above 150 microbar.
PB-27_clumpedLIDI220250205	20	IAEA-603	98	100	809	337	526	86	1.05933	28.0627	48	7.07304	0.00185481	11.7774	0.00456101	18.4211	0.0234787	23.5101	0.149744	-45.0653	34.5718	-0.529069	-0.179038	-73.7691	0.284653	2.45455	-2.3327	Y	Included	Non Condensable Pressure above 150 microbar.
PB-27_clumpedLIDI220250205	21	POL2	96	100	809	359	750	86	1.0642	27.5627	48	-2.15991	0.00217638	4.68723	0.0045445	2.10636	0.0239674	9.76697	0.139388	13.2659	38.605	-0.262445	0.36706	6.31407	0.647717	-7.12452	-9.27576	Y	Included	Non Condensable Pressure above 150 microbar.
PB-27_clumpedLIDI220250205	22	ETH-3	84	100	763	220	457	86	1.05129	23.0919	55	6.39611	0.00217492	12.3966	0.00500156	18.637	0.0236206	24.6641	0.141308	65.005	78.0197	-0.225129	-0.275819	32.4911	0.606526	1.71045	-1.72305	Y	Included	Non Condensable Pressure above 150 microbar.
PB-27_clumpedLIDI220250205	23	BTCARB09-T	120	79	770	234	509	86	1.02152	23.6516	51	-1.68172	0.00202195	8.43453	0.00456373	6.22903	0.0272683	16.5328	0.161638	-35.1242	59.9502	-0.311117	-0.400652	-49.2139	0.575843	-6.75267	-5.59639	Y	Included	Non Condensable Pressure above 150 microbar.
PB-27_clumpedLIDI220250205	24	BTCARB16	145	63	736	527	379	86	1.07003	20.2392	61	-0.794701	0.00191606	9.77324	0.00553655	8.4881	0.0262296	18.9262	0.125344	-198.598	41.7722	-0.289136	-0.702039	-213.102	0.58815	-5.85653	-4.28354	YY	Included	leak rate above 500 microbar/min.Non Condensable Pressure above 150 microbar.
PB-27_clumpedLIDI220250205	25	BTCARB13	166	60	804	278	496	86	1.03869	27.1588	50	-1.22348	0.00216874	7.85449	0.0051913	6.14038	0.0247562	16.3387	0.139452	29.3854	30.0691	-0.30713	0.55913	15.0044	0.580513	-6.24301	-6.1671	Y	Included	Non Condensable Pressure above 150 microbar.
PB-27_clumpedLIDI220250205	26	ETH-2	104	100	826	264	404	86	1.03785	29.4426	45	-5.34568	0.00168339	-4.86068	0.00403579	-10.9889	0.0249621	-8.008	0.164638	45.7787	30.488	-0.729225	1.70622	61.8885	0.215814	-10.1675	-18.6462	Y	Included	Non Condensable Pressure above 150 microbar.
PB-27_clumpedLIDI220250205	27	ETH-1	82	100	753	264	509	86	1.03712	21.6127	59	6.67829	0.00181291	11.8647	0.00480285	18.0183	0.0257978	217.364	5.51625	-826.474	22.3109	-0.605041	188.983	-831.648	0.205905	2.03067	-2.24608	Y	Included	Non Condensable Pressure above 150 microbar.
PB-27_clumpedLIDI220250205	28	ETH-3	80	100	728	293	355	86	1.0521	19.561	65	6.38111	0.00230443	12.383	0.0046535	18.6326	0.0312424	30.2026	0.201785	-275.407	40.3543	-0.200827	5.15484	-297.499	0.632367	1.69497	-1.73635	Y	Included	Non Condensable Pressure above 150 microbar.
PB-27_clumpedLIDI220250205	29	BTCARB16	96	96	741	352	562	86	1.01809	20.3987	60	-0.787851	0.00239268	9.75254	0.00551204	8.4779	0.0254615	20.6609	0.115502	-188.538	26.3368	-0.286167	1.04026	-203.198	0.591354	-5.84847	-4.30389	Y	Included	Non Condensable Pressure above 150 microbar.
PB-27_clumpedLIDI220250205	30	BTCARB13	146	68	809	278	321	86	1.03447	27.2835	46	-1.24026	0.00179994	7.87575	0.0033305	6.13573	0.0246593	16.4003	0.119066	-16.6491	27.7286	-0.315142	0.577649	-30.4098	0.572024	-6.26168	-6.14619	Y	Included	Non Condensable Pressure above 150 microbar.
PB-27_clumpedLIDI220250205	31	BTCARB09-T	167	54	733	234	491	86	1.03633	20.0069	61	-1.68891	0.00220724	8.41162	0.00435114	6.21719	0.0237825	16.8997	0.168806	-419.9	174.021	-0.293117	0.00554	-428.341	0.595026	-6.75949	-5.61888	Y	Included	Non Condensable Pressure above 150 microbar.
PB-27_clumpedLIDI220250205	32	ETH-2	115	100	782	337	330	84	1.0345	25.0747	48	-5.34453	0.00182755	-4.8755	0.0034808	-10.9856	0.0241428	-8.3324	0.119107	129.706	81.613	-0.712425	1.40847	147.141	0.233647	-10.1657	-18.6608	Y	Included	Non Condensable Pressure above 150 microbar.
PB-27_clumpedLIDI220250205	33	IAEA-603	90	100	775	234	477	86	1.04042	24.4354	55	7.08464	0.0021293	11.7349	0.00410681	18.388	0.0258664	24.2072	0.147464	-326.614	431.521	-0.532139	0.585958	-346.809	0.281552	2.46847	-2.37447	Y	Included	Non Condensable Pressure above 150 microbar.
PB-27_clumpedLIDI220250205	34	ETH-3	84	100	743	264	198	81	1.055	22.1715	60	6.40117	0.00210669	12.434	0.00488266	18.7031	0.027677	25.4094	0.130231	877.463	1324.28	-0.201713	0.377418	820.003	0.631082	1.71447	-1.68632	Y	Included	Non Condensable Pressure above 150 microbar.
PB-27_clumpedLIDI220250205	35	BTCARB09-T	83	100	736	381	621	79	1.02549	22.6223	57	-1.68498	0.00176547	8.43319	0.00419552	6.2484	0.0261609	18.2593	0.15835	274.232	61.0677	-0.287187	1.29973	255.633	0.601174	-6.7561	-5.59771	Y	Included	Non Condensable Pressure above 150 microbar.
PB-27_clumpedLIDI220250205	36	BTCARB16	130	66	697	249	328	76	1.06199	19.8493	66	-0.765318	0.00221779	9.77544	0.00544243	8.56989	0.0297455	9.61174	0.677678	152.348	44.0397	-0.240534	-9.84138	131.452	0.639389	-5.8253	-4.28145	Y	Considered as outlier	Non Condensable Pressure above 150 microbar. Outlier sensu peirce for raw D47, rd48 and rd49
PB-27_clumpedLIDI220250205	37	BTCARB13	141	64	736	337	572	79	1.03861	23.1769	55	-1.2254	0.00185637	7.85937	0.00431387	6.06534	0.0234265	20.8782	0.239018	225.93	120.302	-0.384458	5.01844	208.794	0.498721	-6.24525	-6.16231	Y	Considered as outlier	Non Condensable Pressure above 150 microbar. Outlier sensu peirce for raw D47.
PB-27_clumpedLIDI220250205	38	ETH-1	146	100	716	205	196	81	1.05899	20.3589	62	6.67639	0.00200458	11.8755	0.00403752	18.0249	0.0284834	90.4905	2.22456	1146.05	1503.85	-0.607095	65.0445	1082.02	0.203689	2.02825	-2.23544	Y	Included	Non Condensable Pressure above 150 microbar.
PB-27_clumpedLIDI220250205	39	POL2	80	100	736	212	513	81	1.01525	21.5016	56	-2.32832	0.00199505	4.60797	0.0043547	1.85728	0.0266323	12.0868	0.131126	-619.403	139.239	-0.259319	2.82355	-621.888	0.652256	-7.30108	-9.35324	Y	Included	Non Condensable Pressure above 150 microbar.
PB-27_clumpedLIDI220250205	40	ETH-4	80	100	775	264	93	84	1.03625	24.6318	49	-5.39172	0.00189057	-5.00792	0.00393682	-10.95	0.0326261	-7.95117	0.125059	199.792	118.626	-0.496754	2.06012	218.689	0.462618	-10.2111	-18.7907		Included
PB-27_clumpedLIDI220250205	41	BTCARB09-T	89	100	787	256	528	86	1.0392	26.1182	51	-1.67312	0.00186435	8.41788	0.00456174	6.23663	0.0270484	18.0941	0.117302	-35.8762	30.3998	-0.296231	1.16766	-49.9328	0.591622	-6.74289	-5.61277	Y	Included	Non Condensable Pressure above 150 microbar.
PB-27_clumpedLIDI220250205	42	BTCARB13	136	71	782	227	201	89	1.05078	24.4143	54	-1.2195	0.00187675	7.91521	0.00417001	6.19684	0.0234788	15.7368	0.153396	-96.0259	20.1228	-0.314353	-0.15384	-108.764	0.572562	-6.24101	-6.10747	Y	Included	Non Condensable Pressure above 150 microbar.
PB-27_clumpedLIDI220250205	43	BTCARB16	153	58	721	249	113	86	1.0367	18.4215	68	-0.819666	0.00226958	9.70863	0.00434897	8.38603	0.0311317	18.9556	0.146986	-188.264	19.2163	-0.301653	-0.545266	-202.833	0.575351	-5.88076	-4.34695		Included
PB-27_clumpedLIDI220250205	44	ETH-1	138	100	831	286	106	89	1.03614	29.9443	44	6.6815	0.00187444	11.8539	0.00346922	18.0636	0.0301628	89.3964	1.64507	-180.927	13.9463	-0.553449	64.0213	-205.336	0.260498	2.03448	-2.25663		Considered as outlier	Outlier sensu peirce for raw D47.
PB-27_clumpedLIDI220250205	45	ETH-2	103	100	843	586	555	89	1.02436	30.5344	41	-5.35139	0.00154406	-4.93953	0.00352448	-11.0751	0.0221447	-4.90679	0.110279	11.2527	17.8352	-0.732495	4.99705	26.9968	0.212761	-10.1707	-18.7237	YY	Included	leak rate above 500 microbar/min.Non Condensable Pressure above 150 microbar.
PB-27_clumpedLIDI220250205	46	ETH-3	101	100	821	549	106	89	1.05968	28.5709	45	6.37787	0.00193216	12.3336	0.0039649	18.6032	0.022061	26.2185	0.13244	-114.305	14.9468	-0.178496	1.36531	-141.223	0.656237	1.69331	-1.78482	Y	Included	leak rate above 500 microbar/min.
PB-28_clumpedLIDI220250207	1	ETH-3	102	97	853	37	115	91	1.03849	29.9425	46	6.4679	0.0180511	12.3639	0.0367637	18.4906	0.0367226	19.9998	0.989722	-522.408	1519.74							Y	Rejected	First sample of of the carousel is always spurious
PB-28_clumpedLIDI220250207	2	ETH-3	83	100	763	183	189	84	1.03897	22.8755	58	6.37548	0.00216906	12.3239	0.00370018	18.5304	0.0259976	24.7539	0.18865	-65.2071	47.5716	-0.238038	-0.044546	-93.598	0.601624	1.68972	-1.76887	YY	Included	Non Condensable Pressure above 150 microbar.
PB-28_clumpedLIDI220250207	3	ETH-3	81	100	728	161	103	81	1.04428	21.5216	61	6.39198	0.00220633	12.2542	0.00454359	18.4968	0.0257942	24.5611	0.132032	-722.586	792.037	-0.220201	-0.094956	-730.98	0.620995	1.70985	-1.83742	Y	Included
PB-28_clumpedLIDI220250207	4	ETH-3	102	90	789	234	184	84	1.03729	27.9499	47	6.39921	0.00200357	12.3648	0.00367368	18.6048	0.0288946	25.8897	0.117185	107.119	894.75	-0.229111	0.982722	73.3815	0.610905	1.71349	-1.72864	YY	Included	Non Condensable Pressure above 150 microbar.
PB-28_clumpedLIDI220250207	5	ETH-3	80	100	719	154	103	84	1.03399	19.8572	63	6.38524	0.00211066	12.2779	0.00375775	18.5158	0.0274478	25.844	0.179548	-630.412	190.172	-0.217621	1.11018	-641.609	0.623688	1.7018	-1.81411	Y	Included
PB-28_clumpedLIDI220250207	6	ETH-1	91	100	767	242	223	79	1.03577	25.87	49	6.65482	0.0018147	11.8317	0.00304955	17.9737	0.0258174	44.8477	1.67633	751.469	132.533	-0.592824	20.555	699.395	0.221874	2.00524	-2.2532	Y	Included	Non Condensable Pressure above 150 microbar.
PB-28_clumpedLIDI220250207	7	ETH-2	97	100	780	168	98	79	1.01626	27.1393	45	-5.35999	0.00167924	-4.94773	0.00253517	-11.1208	0.0240676	-2.90064	0.195784	-745.225	222.675	-0.76169	7.03979	-741.252	0.171717	-10.1727	-18.7193		Included
PB-28_clumpedLIDI220250207	8	ETH-3	97	100	775	220	145	81	1.0496	26.5845	47	6.40773	0.00217029	12.3593	0.00358677	18.58	0.0254794	25.8975	0.102593	-638.624	122.969	-0.256758	1.00126	-649.635	0.581229	1.72277	-1.73411		Included
PB-28_clumpedLIDI220250207	9	ETH-4	98	100	802	125	103	84	1.03747	27.7294	48	-5.39228	0.00190556	-5.06702	0.00354663	-11.031	0.0248805	-7.08411	0.105582	186.108	42.4043	-0.519663	3.05509	204.931	0.432087	-10.2027	-18.8365		Included
PB-28_clumpedLIDI220250207	11	BTCARB16	135	62	723	711	1202	91	1.0018	18.5701	66	-0.787959	0.00219066	9.72764	0.00447869	8.46013	0.0248646	19.8507	0.138931	-197.751	25.9501	-0.279428	0.295002	-212.206	0.602644	-5.84385	-4.30478	YY	Included	leak rate above 500 microbar/min.Non Condensable Pressure above 150 microbar.
PB-28_clumpedLIDI220250207	13	IAEA-603	85	100	775	198	113	89	1.0355	22.2894	56	7.0762	0.00219435	11.7072	0.00443767	18.3868	0.0313088	23.0834	0.153311	-83.6507	17.5613	-0.497788	-0.457243	-111.076	0.322401	2.45856	-2.37657		Included
PB-28_clumpedLIDI220250207	14	ETH-1	105	59	540	300	101	89	0.745419	8.74854	100	6.66646	0.00277594	11.8079	0.0050691	17.9219	0.0464313	36.9067	0.599248	-583.401	38.3268							YYY	Rejected	Sample pressure too low (<600 microbar).Bad adjustment between the belows.Extreme bellow position.
PB-28_clumpedLIDI220250207	15	VIA2	96	99	819	242	115	89	1.03825	27.0354	46	-2.71576	0.0017905	7.20535	0.00493208	4.02967	0.0230736	14.2761	0.357544	97.1199	14.5758	-0.230955	-0.183907	84.891	0.674941	-7.80429	-6.77969		Included
PB-28_clumpedLIDI220250207	16	BTCARB16	150	54	706	293	101	89	1.03475	16.9702	70	-0.787728	0.0020019	9.78563	0.00410533	8.49808	0.0293956	19.3988	0.161795	-144.048	17.5486	-0.298493	-0.263036	-159.565	0.58193	-5.84573	-4.24778		Included
PB-28_clumpedLIDI220250207	19	ETH-2	87	100	784	381	614	91	1.02141	23.1805	55	-5.35879	0.00171434	-4.93773	0.00396965	-11.1	0.0234108	-8.95607	0.183492	13.2434	20.4615	-0.751787	0.903867	29.0231	0.182293	-10.1718	-18.7095	Y	Included	Non Condensable Pressure above 150 microbar.
PB-28_clumpedLIDI220250207	20	IAEA-603	106	100	843	264	108	89	1.03524	30.672	43	7.09211	0.00193361	11.7609	0.0037655	18.4042	0.027513	23.9089	0.177535	-61.1693	13.3268	-0.549158	0.243205	-89.3781	0.266973	2.47353	-2.32386		Included
PB-28_clumpedLIDI220250207	21	VIA2	89	100	797	300	440	91	1.03666	24.9836	51	-2.65227	0.00205849	7.16024	0.00404735	3.98212	0.0272403	14.707	0.164863	-29.9135	20.9842	-0.299954	0.33044	-40.7072	0.600811	-7.73502	-6.82417	Y	Included	Non Condensable Pressure above 150 microbar.
PB-28_clumpedLIDI220250207	22	ETH-3	90	100	797	205	108	89	1.04495	24.9571	51	6.38867	0.00144236	12.3203	0.00452401	18.5713	0.027573	24.5112	0.181403	-103.313	18.4729	-0.207939	-0.274343	-130.553	0.63387	1.7039	-1.77239		Included
PB-28_clumpedLIDI220250207	24	BTCARB16	146	60	755	630	101	89	1.0551	20.8104	59	-0.782003	0.00196373	9.85141	0.00368497	8.56902	0.0256471	19.2697	0.136886	-172.005	23.8815	-0.298105	-0.519898	-187.124	0.582026	-5.84204	-4.18313	Y	Included	leak rate above 500 microbar/min.
PB-28_clumpedLIDI220250207	26	ETH-2	85	100	760	300	103	91	1.05181	20.8859	62	-5.34785	0.00189796	-4.85649	0.00380046	-10.939	0.0250989	-9.14349	0.178833	-51.6406	21.4742	-0.680665	0.551189	-37.0372	0.258195	-10.1631	-18.6296		Included
PB-28_clumpedLIDI220250207	27	ETH-1	100	100	838	293	113	91	1.03298	29.5895	45	6.66757	0.00175859	11.8381	0.00309263	17.9499	0.0240437	54.4913	0.618601	-110.783	11.1947	-0.635399	29.9614	-137.243	0.176107	2.01859	-2.24696		Included
PB-28_clumpedLIDI220250207	28	ETH-3	85	100	787	330	101	91	1.03929	23.8422	54	6.3823	0.00190874	12.3496	0.0040691	18.5441	0.0240749	27.7701	0.122537	-115.922	18.9268	-0.256624	2.84756	-142.821	0.581536	1.69604	-1.74354		Included
PB-28_clumpedLIDI220250207	29	BTCARB16	148	60	765	256	115	91	1.05407	21.5246	59	-0.760944	0.00206899	9.77783	0.0045619	8.52163	0.0245408	20.7304	0.135713	-130.725	22.0597	-0.295203	1.05835	-146.495	0.585368	-5.81692	-4.2555		Included
PB-28_clumpedLIDI220250207	32	ETH-1	105	100	848	249	103	91	1.03459	30.972	41	6.6882	0.00184614	11.8907	0.00450094	18.0666	0.0231447	535.137	1.98491	-881.469	12.2852	-0.59304	499.27	-885.01	0.22122	2.03863	-2.19537		Included
PB-28_clumpedLIDI220250207	33	IAEA-603	90	100	809	293	115	91	1.03804	26.0352	52	7.08414	0.00234642	11.6969	0.00385319	18.3855	0.02144	45.7749	0.296485	-94.0932	19.2114	-0.497273	21.733	-121.196	0.322962	2.46739	-2.3867		Included
PB-28_clumpedLIDI220250207	34	ETH-3	86	100	784	418	103	91	1.05879	23.5939	57	6.42358	0.00217251	12.4553	0.00407014	18.7522	0.0249175	31.8496	0.126773	-169.263	17.4566	-0.197216	6.61798	-194.74	0.644604	1.73613	-1.63975	Y	Included
PB-28_clumpedLIDI220250207	36	BTCARB16	152	59	770	337	103	91	1.01216	21.7392	57	-0.78375	0.00211364	9.88378	0.00425712	8.58633	0.0291752	21.9731	0.114511	-144.235	21.1413	-0.310647	2.06677	-159.913	0.568434	-5.84509	-4.15131		Included
PB-28_clumpedLIDI220250207	38	ETH-2	85	100	777	212	103	91	1.0149	22.2446	54	-5.35783	0.00212983	-4.87782	0.00370627	-11.0115	0.0252819	-7.5386	0.148581	-34.7822	23.4578	-0.722496	2.21475	-19.8675	0.213452	-10.173	-18.6506		Included
PB-28_clumpedLIDI220250207	39	VIA2	105	94	853	593	113	91	1.03522	31.4148	40	-2.67222	0.00139706	7.15601	0.00269026	3.99961	0.0217513	17.1345	0.167644	-21.2919	15.7479	-0.257779	2.732	-32.1529	0.646175	-7.75611	-6.82828	Y	Included	leak rate above 500 microbar/min.
PB-28_clumpedLIDI220250207	40	ETH-4	105	100	848	227	137	91	1.04095	30.6504	40	-5.38902	0.00171838	-4.98843	0.00357008	-10.9432	0.0273896	-7.53311	0.146954	18.9788	20.8119	-0.511879	2.44313	34.9848	0.440077	-10.2021	-18.7592		Included
PB-28_clumpedLIDI220250207	43	BTCARB16	135	63	741	264	115	89	1.05537	19.3531	67	-0.766176	0.00191242	9.77864	0.00460384	8.52852	0.0300436	19.8996	0.132209	-191.323	18.8065	-0.283766	0.241887	-205.991	0.597659	-5.82252	-4.25469		Included
PB-28_clumpedLIDI220250207	44	ETH-1	90	100	802	286	108	89	1.03495	25.5125	51	6.67381	0.00199301	11.9033	0.00353352	18.0707	0.0257376	905.856	2.50277	-1917.65	55.0812	-0.586548	861.282	-1890.23	0.228196	2.02284	-2.1829		Included
PB-28_clumpedLIDI220250207	45	ETH-2	91	100	802	542	113	89	1.03253	24.6556	51	-5.35541	0.00162491	-4.91449	0.00431397	-11.0282	0.0256349	19.0912	0.41664	-66.2626	21.1892	-0.705682	29.1821	-51.7681	0.231644	-10.1691	-18.6866	Y	Included	leak rate above 500 microbar/min.
PB-28_clumpedLIDI220250207	46	ETH-3	91	100	797	300	108	91	1.03383	24.7705	51	6.3961	0.00191054	12.3511	0.00395516	18.6185	0.0307681	34.1688	0.143631	-149.11	17.4664	-0.199022	9.08833	-175.014	0.643263	1.71068	-1.74219		Included
PB-3_clumpedLIDI220240611bis	1	BDH	120	85	780	51	91	74	1.03774	42.5407	39	6.68505	0.017343	12.2333	0.0447178	18.2186	0.0323752	32.0815	0.248114	260.819	80.4651	-0.773254	7.28589	222.341	0.01314	2.04688	-1.74699	Y	Considered as outlier	First sample of of the carousel is always spurious
PB-3_clumpedLIDI220240611bis	2	BDH	104	98	782	117	86	74	1.0399	38.4876	42	6.54005	0.00158008	12.0023	0.00292293	18.0975	0.0210116	25.7411	0.274243	1.65259	7.19673	-0.519377	1.55489	-28.3317	0.283926	1.90106	-1.9733	Y	Included
PB-3_clumpedLIDI220240611bis	3	BDH	117	88	794	227	91	74	1.0377	43.4783	37	6.55462	0.00166869	11.9642	0.00287466	18.0829	0.0200087	26.5346	0.356034	-14.9916	4.01149	-0.511628	2.40509	-44.4218	0.292245	1.91796	-2.01067	Y	Included
PB-3_clumpedLIDI220240611bis	4	BDH	118	87	789	190	89	74	1.02379	42.0469	37	6.55264	0.00149617	11.987	0.00225721	18.1023	0.0170185	26.0564	0.273129	-21.4157	5.00178	-0.512695	1.89314	-50.6939	0.291013	1.91502	-1.98835	Y	Included
PB-3_clumpedLIDI220240611bis	5	BDH	93	100	736	198	89	71	1.03678	32.5474	46	6.54134	0.00185313	11.9099	0.00334226	18.0841	0.0271221	25.793	0.183471	-37.6522	10.5505	-0.444059	1.78861	-66.2936	0.364148	1.90582	-2.06399	Y	Considered as outlier	Outlier sensu peirce for raw D47.
PB-3_clumpedLIDI220240611bis	6	ETH-1	105	100	736	154	84	74	1.03689	32.8013	45	6.65191	0.00217002	11.759	0.00332237	17.8791	0.022464	135.179	1.78429	-117.442	10.1079	-0.611989	108.946	-143.558	0.18646	2.02898	-2.21228		Included
PB-3_clumpedLIDI220240611bis	7	ETH-2	116	100	797	176	91	76	1.0337	42.4499	34	-5.39926	0.00145652	-5.06679	0.00220649	-11.2336	0.0198591	1.93694	0.153082	-45.9416	2.5261	-0.717446	12.1678	-30.7947	0.219953	-10.1745	-18.6925		Included
PB-3_clumpedLIDI220240611bis	8	ETH-3	85	100	719	161	86	74	1.03404	30.0625	46	6.36477	0.00165269	12.2478	0.00313589	18.5002	0.0189649	28.778	0.187659	-100.996	4.23226	-0.182864	4.03306	-128.161	0.640033	1.70559	-1.73206		Included
PB-3_clumpedLIDI220240611bis	10	BTCARB05	143	64	701	154	86	74	1.05616	27.5262	57	-1.65268	0.00183855	8.26721	0.00325868	6.12142	0.0240344	19.6303	0.265926	-112.214	6.801	-0.284958	2.97809	-124.92	0.593344	-6.67879	-5.6194		Included
PB-3_clumpedLIDI220240611bis	11	BTCARB08	0	100	679	190	86	74	1.05238	24.5317	62	-1.75821	0.00253068	8.41668	0.00426575	7.58278	2.8494	24.9717	12.8729	-363.145	444.976								Rejected	Software or hardware error during the acquisition and/or non steady signal through the acquisition process
PB-3_clumpedLIDI220240611bis	12	BTCARB09	114	78	687	337	84	74	1.01961	25.4997	57	-1.6907	0.00173038	8.36556	0.00329812	6.18578	0.0216769	18.617	0.209869	-146.207	6.59603	-0.277573	1.7859	-158.553	0.600882	-6.72285	-5.52284		Included
PB-3_clumpedLIDI220240611bis	13	BDH	113	100	789	168	89	74	1.03507	42.8384	36	6.48886	0.0013818	11.9522	0.00218577	17.9735	0.0225297	26.842	0.228106	-92.2826	3.31007	-0.539944	2.72915	-119.322	0.262658	1.84843	-2.02236		Included
PB-3_clumpedLIDI220240611bis	14	ETH-1	110	100	758	161	86	74	1.04042	36.1897	42	6.64867	0.00158851	11.7752	0.00292745	17.8845	0.0211652	266.054	1.09858	-275.032	6.08276	-0.619126	236.757	-296.505	0.178838	2.02494	-2.19639		Included
PB-3_clumpedLIDI220240611bis	15	IAEA-603	110	100	782	212	89	76	1.03684	40.6707	37	7.05596	0.00178529	11.6154	0.00332408	18.2482	0.0214239	36.749	0.221166	-112.474	4.67381	-0.523923	13.0778	-138.865	0.278334	2.46413	-2.35406		Included
PB-3_clumpedLIDI220240611bis	16	ETH-4	103	100	767	154	86	76	1.03755	36.2747	40	-5.42649	0.00158735	-5.14063	0.00282579	-11.1243	0.0166643	-2.81763	0.143045	-56.753	4.6261	-0.505738	7.5142	-41.61	0.444708	-10.2007	-18.7648		Included
PB-3_clumpedLIDI220240611bis	17	BTCARB28	131	71	719	234	93	76	1.03861	28.7788	55	-0.769292	0.00327256	12.4458	0.00926143	2.28677	1.18498	-27.824	7.45668	-1256.47	501.536								Rejected	Software or hardware error during the acquisition and/or non steady signal through the acquisition process
PB-3_clumpedLIDI220240611bis	18	BTCARB05	166	59	750	147	167	79	1.03689	32.8634	48	-1.61917	0.0015403	8.28447	0.0026689	2.75194	0.435015	-2.85876	2.74816	-5209.82	10754.1							Y	Rejected	Software or hardware error during the acquisition and/or non steady signal through the acquisition process
PB-3_clumpedLIDI220240611bis	19	BTCARB08	114	77	675	176	89	76	1.03677	22.5739	66	-1.75236	0.0017128	8.42956	0.00419118	6.17462	0.0265636	18.1631	0.15412	-116.491	5.38417	-0.287334	1.21238	-129.319	0.590549	-6.79079	-5.45991		Included
PB-3_clumpedLIDI220240611bis	20	BTCARB09	120	77	711	147	91	79	1.03551	26.6881	56	-1.65602	0.00143872	8.40067	0.00309112	6.33444	0.0219171	19.1739	0.293727	-113.438	3.37106	-0.199932	2.26376	-126.351	0.682764	-6.68724	-5.48847		Considered as outlier	Outlier sensu peirce for raw D47.
PB-3_clumpedLIDI220240611bis	21	BDH	103	100	767	183	93	76	1.03774	35.327	44	6.54187	0.00154351	11.9745	0.0027268	18.163	0.0205282	25.8391	0.297552	-93.2196	3.02829	-0.429978	1.70563	-120.318	0.378738	1.90402	-2.00055		Considered as outlier	Outlier sensu peirce for raw D47.
PB-3_clumpedLIDI220240611bis	22	VIA1	89	100	777	147	91	79	1.02257	36.5759	41	-2.47591	0.0013433	6.89126	0.00259233	3.938	0.024803	15.4606	0.299481	-70.1811	3.65891	-0.263774	1.60836	-80.2174	0.626817	-7.50419	-6.96746		Included
PB-3_clumpedLIDI220240611bis	23	ETH-2	88	100	733	190	93	79	1.03684	29.0471	49	-5.39406	0.00178506	-5.04913	0.0028067	-11.2186	0.0249123	-8.66113	0.275199	-66.7678	3.89759	-0.725091	1.42594	-51.9899	0.211742	-10.1696	-18.6751		Included
PB-3_clumpedLIDI220240611bis	24	ETH-3	85	100	733	418	89	79	1.04376	29.9892	48	6.36729	0.00209959	12.2525	0.00391909	18.5175	0.022117	25.4702	0.35981	-95.2456	4.37988	-0.172943	0.79563	-122.595	0.650505	1.70809	-1.72751		Included
PB-3_clumpedLIDI220240611bis	25	ETH-1	105	100	755	190	93	79	1.04052	33.3689	48	6.64513	0.00158621	11.6832	0.00350101	17.8594	0.018446	391.429	1.35489	-278.341	2.40055	-0.550848	359.477	-299.588	0.251626	2.02455	-2.28657		Included
PB-3_clumpedLIDI220240611bis	27	BTCARB05	156	62	750	190	91	79	1.03941	31.6959	49	-1.67985	0.00221087	8.24303	0.00356111	6.03286	0.0234707	22.546	0.130518	-72.0983	4.15672	-0.321316	5.89436	-85.3086	0.555095	-6.70681	-5.64307		Included
PB-3_clumpedLIDI220240611bis	28	BTCARB08	0	100	711	125	91	76	1.05653	26.7238	57	-1.75708	0.00208764	8.4433	0.0043734	6.19627	0.0222389	24.5881	0.18016	-110.868	5.6705	-0.274328	7.50294	-123.796	0.604282	-6.79632	-5.44642		Included
PB-3_clumpedLIDI220240611bis	29	BTCARB09	127	75	728	190	91	79	1.03788	28.6595	52	-1.68712	0.00197493	8.33315	0.00311028	6.13886	0.0260245	20.6191	0.199596	-108.755	5.07142	-0.29631	3.81938	-121.591	0.581176	-6.71785	-5.55464		Included
PB-3_clumpedLIDI220240611bis	30	BDH	103	100	794	183	93	79	1.03564	40.1491	38	6.56012	0.00136969	12.0025	0.0026479	18.1752	0.0220058	28.2519	0.27181	-93.7208	2.74541	-0.463797	4.00606	-120.869	0.342687	1.92241	-1.97312		Included
PB-3_clumpedLIDI220240611bis	31	ETH-4	101	100	777	205	89	79	1.03809	36.1716	40	-5.43344	0.00165363	-5.16609	0.00289036	-11.1317	0.0206982	-5.90641	0.249612	-70.06	3.67561	-0.4809	4.44484	-55.076	0.471178	-10.2072	-18.7898		Included
PB-3_clumpedLIDI220240611bis	32	ETH-1	88	100	733	154	89	76	1.03766	30.4836	47	6.65357	0.00229091	11.8251	0.0037839	17.9809	0.0256116	87.336	0.282526	-166.17	4.88981	-0.577987	62.0695	-190.95	0.222136	2.02834	-2.14743		Included
PB-3_clumpedLIDI220240611bis	33	BTCARB09	110	84	706	220	93	76	1.03606	26.7218	59	-1.17154	0.00150209	8.52151	0.00434395	6.87802	0.0250817	28.5081	0.16127	-150.175	4.06239	-0.27831	11.2008	-163.183	0.596632	-6.17621	-5.371		Included
PB-3_clumpedLIDI220240611bis	34	BTCARB08	123	76	719	168	91	74	1.01286	28.956	53	-1.76305	0.00160385	8.43901	0.00299718	6.1576	0.0218437	22.4876	0.270664	-169.769	4.89939	-0.302397	5.44602	-181.829	0.574604	-6.80251	-5.45062		Included
PB-3_clumpedLIDI220240611bis	35	BTCARB05	160	60	736	190	89	74	1.03542	31.4659	49	-1.66805	0.00169469	8.21073	0.00328843	6.00493	0.0240643	20.7241	0.290746	-151.463	4.05123	-0.329766	4.16654	-163.501	0.546242	-6.69307	-5.67478		Included
PB-3_clumpedLIDI220240611bis	37	BDH	0	100	135	813	1085	74	0.0512086	0.721441	100	4.57444	0.0179071	9.03821	0.042874	11.8108	0.221476	174.741	2.63305	-10300.1	142.976							YYYYYY	Rejected	Sample pressure too low (<600 microbar).Bad adjustment between the belows.leak rate above 500 microbar/min.Non Condensable Pressure above 150 microbar.Extreme bellow position.
PB-3_clumpedLIDI220240611bis	38	ETH-1	0	100	711	403	84	74	1.04168	29.2977	51	6.61656	0.00256515	11.7587	0.00375196	17.6533	0.0504295	132.303	0.499582	-235.871	10.1325	-0.797307	106.137	-258.455	-0.009628	1.99138	-2.21243	Y	Considered as outlier	Outlier sensu peirce for raw D47, rd45, rd47
PB-3_clumpedLIDI220240611bis	39	ETH-2	85	100	697	366	763	74	1.04939	26.6814	55	-5.38975	0.00185271	-5.04339	0.00301077	-11.1936	0.0258891	-2.50001	0.309437	-181.265	4.27033	-0.709927	7.63813	-168.313	0.227754	-10.1652	-18.6695	Y	Included	Non Condensable Pressure above 150 microbar.
PB-3_clumpedLIDI220240611bis	40	ETH-3	80	100	692	183	86	71	1.04629	26.7119	55	6.3489	0.00213268	12.2464	0.00389415	18.4986	0.0261879	28.4646	0.586295	-247.656	5.00293	-0.16669	3.73	-270.376	0.657254	1.68875	-1.73346		Included
PB-30_clumpedLIDI220250212	1	ETH-3	86	100	760	110	106	81	1.03972	24.7277	54	6.50395	0.00974578	12.516	0.0177515	18.7161	0.0267931	29.4193	0.340966	878.765	1650.33							Y	Rejected	First sample of of the carousel is always spurious
PB-30_clumpedLIDI220250212	2	ETH-3	85	100	789	44	103	89	1.03881	28.5685	47	10.7734	0.0870396	12.8456	0.0324539	24.4079	0.114968	138.172	1.15826	9030.54	459.678							YY	Rejected	Software or hardware error during the acquisition and/or non steady signal through the acquisition process
PB-30_clumpedLIDI220250212	3	ETH-3	80	100	745	256	111	86	1.04184	21.534	59	6.48498	0.00641523	12.2841	0.0032904	18.7008	0.0354686	41.87	0.762138	914.408	123.446							Y	Rejected	Software or hardware error during the acquisition and/or non steady signal through the acquisition process
PB-30_clumpedLIDI220250212	4	ETH-3	88	100	784	256	106	89	1.036	24.8466	51	6.40507	0.00295471	12.3695	0.00310179	18.6155	0.0227123	27.078	0.0894274	-129.654	54	-0.229082	2.1329	-156.189	0.576517	1.6937	-1.78692	Y	Included
PB-30_clumpedLIDI220250212	5	ETH-3	97	95	816	337	111	89	1.03472	28.0751	45	6.40329	0.00218171	12.3236	0.00404793	18.5725	0.0172438	24.824	0.125527	-337.982	301.701	-0.224933	0.024391	-358.107	0.581203	1.69349	-1.83187	Y	Included
PB-30_clumpedLIDI220250212	6	ETH-1	101	100	833	271	108	89	1.01763	29.9151	41	6.67316	0.00173108	11.8689	0.00444538	18.0619	0.0265213	347.975	9.57998	-1039.35	1461.53	-0.561101	316.537	-1038.18	0.220948	1.99701	-2.27752		Included
PB-30_clumpedLIDI220250212	7	ETH-2	102	100	833	198	113	91	1.02442	29.0791	41	-5.35341	0.00146352	-4.9094	0.00500903	-11.0461	0.0233355	5.976	0.699024	460.453	160.89	-0.730814	15.9266	483.105	0.179193	-10.1721	-18.6755		Included
PB-30_clumpedLIDI220250212	8	ETH-3	87	100	782	322	111	91	1.03701	23.5556	50	6.41603	0.00193445	12.3674	0.0047696	18.6871	0.0269397	31.1882	0.500846	31.6735	88.7774	-0.167999	6.14761	0.212852	0.64208	1.70543	-1.78905		Included
PB-30_clumpedLIDI220250212	9	ETH-4	104	100	836	190	111	91	1.03676	29.4814	45	-5.39421	0.0015707	-5.02726	0.00461197	-10.9193	0.0203716	-4.95023	0.289804	187.014	51.2246	-0.444032	5.13042	205.758	0.488023	-10.2111	-18.7908		Included
PB-30_clumpedLIDI220250212	11	BTCARB13	169	55	828	256	113	91	1.03359	28.5956	45	-1.22014	0.0015843	7.85539	0.00424602	6.14996	0.0261117	17.1298	0.128867	-27.9811	28.9383	-0.301933	1.3362	-41.5657	0.558451	-6.2473	-6.18895		Included
PB-30_clumpedLIDI220250212	12	BTCARB08-T	117	76	784	366	101	91	1.0374	23.5934	53	-1.74416	0.00193898	8.51133	0.00483284	6.27951	0.0254227	18.4994	0.13774	-103.105	34.216	-0.271281	1.38065	-116.275	0.590896	-6.82841	-5.54568		Included
PB-30_clumpedLIDI220250212	13	IAEA-603	93	100	821	212	115	91	1.03385	28.0776	45	7.08736	0.00187615	11.7499	0.00438298	18.4649	0.0223066	23.8521	0.119925	-90.2152	29.5478	-0.474081	0.209361	-117.528	0.312888	2.4417	-2.39496		Included
PB-30_clumpedLIDI220250212	14	ETH-1	91	100	814	740	1178	96	1.0465	26.8961	46	6.66421	0.00203457	11.873	0.00396839	18.0711	0.0252474	46.568	1.35521	-163.294	29.0898	-0.546886	22.152	-188.244	0.236242	1.98735	-2.27353	YY	Included	leak rate above 500 microbar/min.Non Condensable Pressure above 150 microbar.
PB-30_clumpedLIDI220250212	15	VIA2	98	96	828	256	115	91	1.01693	28.2762	42	-2.64673	0.00182066	7.12164	0.00380886	4.0033	0.0253216	15.4795	0.11744	-57.3588	27.3014	-0.246926	1.16879	-67.7824	0.628231	-7.73699	-6.90408		Included
PB-30_clumpedLIDI220250212	16	BTCARB13	141	61	758	557	1014	93	1.03718	20.9721	56	-1.24846	0.0017862	7.87018	0.00439918	6.21068	0.0242139	15.8894	0.125105	-160.131	30.4014	-0.226772	0.085734	-171.868	0.639257	-6.27795	-6.17442	YY	Considered as outlier	leak rate above 500 microbar/min.Non Condensable Pressure above 150 microbar.
PB-30_clumpedLIDI220250212	18	BTCARB05-T	178	55	865	242	113	93	1.03693	31.1246	43	-1.6656	0.00160146	8.40115	0.00253198	6.17106	0.0231544	17.3952	0.128908	-65.1181	10.4798	-0.352826	0.513636	-78.7257	0.503433	-6.74086	-5.65371		Considered as outlier	Outlier sensu peirce for raw D47 and rd46.
PB-30_clumpedLIDI220250212	19	ETH-2	81	100	777	615	1156	93	1.03744	22.1255	56	-5.35322	0.00152252	-4.88298	0.00379057	-10.9691	0.0257067	-8.93433	0.125096	-64.7009	26.5685	-0.679329	0.815677	-50.2435	0.234372	-10.1729	-18.6497	YY	Included	leak rate above 500 microbar/min.Non Condensable Pressure above 150 microbar.
PB-30_clumpedLIDI220250212	20	IAEA-603	100	100	843	366	103	91	1.03809	30.3962	42	7.09419	0.0013113	11.7676	0.0035106	18.4861	0.0224818	23.5417	0.139514	-109.629	17.0204	-0.477553	-0.12891	-136.395	0.309038	2.44832	-2.37762		Included
PB-30_clumpedLIDI220250212	21	VIA2	86	100	794	806	775	93	1.03694	23.9623	51	-2.71008	0.00185708	7.19748	0.00513982	4.01165	0.0273201	14.2284	0.118374	-116.783	26.063	-0.247088	-0.215246	-126.62	0.628015	-7.80712	-6.82969	YY	Included	leak rate above 500 microbar/min.Non Condensable Pressure above 150 microbar.
PB-30_clumpedLIDI220250212	22	ETH-3	80	100	755	344	111	91	1.06796	20.6814	60	6.39028	0.00221869	12.3608	0.00476823	18.6239	0.0271911	24.5638	0.133747	-264.53	21.45	-0.19718	-0.302965	-286.929	0.610899	1.6783	-1.79544		Included
PB-30_clumpedLIDI220250212	24	BTCARB13	162	57	816	359	743	93	1.0334	26.0959	46	-1.25698	0.00186289	7.88425	0.00441857	6.15382	0.0227432	16.2015	0.151154	-112.391	15.4815	-0.288191	0.365073	-124.811	0.57326	-6.28752	-6.16062	Y	Included	Non Condensable Pressure above 150 microbar.
PB-30_clumpedLIDI220250212	25	BTCARB08-T	117	78	806	601	115	91	1.03723	25.3637	52	-1.74748	0.00187156	8.48355	0.00469244	6.249	0.0208207	17.4744	0.130369	-90.0767	19.7114	-0.27109	0.428061	-103.387	0.591251	-6.83093	-5.57287	Y	Included	leak rate above 500 microbar/min.
PB-30_clumpedLIDI220250212	27	ETH-1	93	100	821	344	115	91	1.03875	27.2767	48	6.67903	0.00172439	11.8495	0.0041362	18.0991	0.0254639	33.9608	0.490431	-180.27	21.2358	-0.511761	9.88576	-204.69	0.274007	2.00396	-2.29654	Y	Considered as outlier	Outlier sensu peirce for raw D47.
PB-30_clumpedLIDI220250212	28	ETH-3	80	100	741	557	763	89	1.03514	20.1609	62	6.4357	0.00248655	12.4219	0.00447074	18.7555	0.0320734	25.8294	0.111528	-404.157	21.169	-0.173973	0.811057	-422.4	0.635301	1.72435	-1.73568	YY	Included	leak rate above 500 microbar/min.Non Condensable Pressure above 150 microbar.
PB-30_clumpedLIDI220250212	29	BTCARB13	160	56	799	388	111	86	1.03408	26.1785	48	-1.22423	0.00158987	7.86461	0.00387375	6.16673	0.0250551	16.6716	0.12526	-207.543	20.262	-0.290032	0.866836	-218.629	0.571211	-6.25198	-6.17992		Included
PB-30_clumpedLIDI220250212	30	BTCARB05-T	173	55	838	418	667	86	1.03526	31.7676	40	-1.64165	0.00183498	8.34353	0.00328582	6.19799	0.0213211	17.9434	0.137782	-151.925	27.7266	-0.294672	1.16714	-164.197	0.566053	-6.71329	-5.71016	Y	Included	Non Condensable Pressure above 150 microbar.
PB-30_clumpedLIDI220250212	32	ETH-1	98	100	814	454	626	86	1.03569	29.4385	41	6.68274	0.00174626	11.8891	0.00413397	18.0498	0.0272171	45.7915	0.817871	-817.514	205.201	-0.602429	21.3609	-822.964	0.176412	2.00646	-2.25776	Y	Included	Non Condensable Pressure above 150 microbar.
PB-30_clumpedLIDI220250212	33	IAEA-603	89	100	784	315	111	86	1.03805	26.3449	50	7.07287	0.00214127	11.706	0.00461434	18.3918	0.0213755	26.0035	0.130922	-411.923	161.124	-0.48838	2.39795	-429.52	0.297814	2.4279	-2.43788		Included
PB-30_clumpedLIDI220250212	34	ETH-3	80	100	758	440	672	84	1.04619	21.9304	59	6.59162	0.00226445	12.8471	0.00386069	19.3341	0.0273087	26.1571	0.127342	378.165	1431.51	-0.178837	0.290381	334.647	0.627243	1.87456	-1.31982	Y	Included	Non Condensable Pressure above 150 microbar.
PB-30_clumpedLIDI220250212	36	BTCARB13	154	57	770	410	491	84	1.03758	24.9698	50	-1.24489	0.00182836	7.85924	0.0032886	6.10661	0.0236835	16.8739	0.141569	-658.277	172.326	-0.323201	1.07662	-663.047	0.535712	-6.27375	-6.18513	Y	Considered as outlier	Non Condensable Pressure above 150 microbar. Outlier sensu peirce for raw D47.
PB-30_clumpedLIDI220250212	37	BTCARB08-T	107	78	736	278	108	86	1.04449	21.0599	58	-1.74722	0.00211538	8.47483	0.00456148	6.1736	0.0324057	17.0403	0.130396	-491.102	135.382	-0.337784	0.018427	-498.537	0.519651	-6.83033	-5.5814		Considered as outlier	Outlier sensu peirce for raw D47 and rd46.
PB-30_clumpedLIDI220250212	38	ETH-2	102	100	821	425	611	89	1.03446	29.1378	42	-5.35274	0.00149539	-4.90669	0.00378501	-11.0618	0.0226526	-8.78886	0.209683	33.5473	48.4983	-0.75005	1.01028	49.5719	0.158513	-10.1715	-18.6729	Y	Included	Non Condensable Pressure above 150 microbar.
PB-30_clumpedLIDI220250212	39	VIA2	103	91	828	242	115	89	1.02714	30.1135	40	-2.64802	0.00133613	7.15617	0.00331887	4.01309	0.0250599	14.5915	0.124053	-75.1696	25.1658	-0.269534	0.224668	-85.4566	0.603788	-7.73963	-6.87027		Included
PB-30_clumpedLIDI220250212	40	ETH-4	80	100	733	418	531	89	1.03703	19.4284	58	-5.39195	0.00246734	-4.98634	0.00307709	-10.888	0.0266915	-8.86066	0.130498	-147.706	37.4199	-0.455135	1.09802	-134.319	0.475891	-10.2102	-18.7508	Y	Included	Non Condensable Pressure above 150 microbar.
PB-30_clumpedLIDI220250212	42	BTCARB05-T	163	58	841	388	738	89	1.03257	29.2299	45	-1.67666	0.00171469	8.306	0.00362501	6.1541	0.02406	17.2963	0.163411	-138.98	13.9242	-0.265528	0.605226	-151.346	0.597713	-6.74913	-5.74683	Y	Included	Non Condensable Pressure above 150 microbar.
PB-30_clumpedLIDI220250212	43	BTCARB13	157	58	799	227	111	86	1.06042	26.5523	49	-1.23116	0.00161843	7.81162	0.00365422	6.1329	0.0255813	16.0917	0.137858	-152.377	16.6472	-0.264821	0.401132	-164.142	0.598578	-6.25741	-6.23178		Included
PB-30_clumpedLIDI220250212	44	ETH-1	99	100	821	557	1087	91	1.03492	29.4326	43	6.68169	0.00157316	11.8615	0.00368744	18.0621	0.0217395	77.7381	1.3175	-238.356	15.5222	-0.562397	52.6188	-261.064	0.219549	2.00636	-2.28487	YY	Included	leak rate above 500 microbar/min.Non Condensable Pressure above 150 microbar.
PB-30_clumpedLIDI220250212	45	ETH-2	90	100	789	256	111	86	1.03391	24.7449	49	-5.34571	0.00203257	-4.93429	0.00444483	-11.0146	0.0239829	-5.44136	0.118522	-56.9918	26.1413	-0.682436	4.44659	-42.3259	0.231242	-10.163	-18.6999		Included
PB-30_clumpedLIDI220250212	46	ETH-3	80	100	763	674	1158	91	1.06249	22.5791	55	6.39464	0.00186647	12.3728	0.00355477	18.6956	0.0268832	24.9564	0.135289	-256.964	18.7319	-0.142952	0.056394	-279.614	0.669064	1.68249	-1.78369	YY	Included	leak rate above 500 microbar/min.Non Condensable Pressure above 150 microbar.
PB-31_clumpedLIDI220250217	1	ETH-3	96	99	860	73	111	91	1.03513	27.3539	48	6.51508	0.0107399	12.5094	0.0189927	18.8717	0.0384	31.1979	0.49689	219.652	40.5653							Y	Rejected	First sample of of the carousel is always spurious
PB-31_clumpedLIDI220250217	2	ETH-3	96	99	853	293	118	91	1.01337	26.4739	48	6.75179	0.0087077	12.5882	0.00566467	19.5649	0.0389104	63.3442	2.01839	7634.45	1155.49							YY	Rejected	Software or hardware error during the acquisition and/or non steady signal through the acquisition process
PB-31_clumpedLIDI220250217	3	ETH-3	88	100	841	264	113	91	1.05324	25.037	51	6.37461	0.00244444	12.2836	0.00570772	18.5338	0.0263536	27.8271	0.190072	-42.6106	166.892	-0.194697	3.03412	-71.6144	0.608578	1.6672	-1.84074	Y	Included
PB-31_clumpedLIDI220250217	4	ETH-3	82	100	809	352	111	91	1.06072	21.8118	58	6.40869	0.0022774	12.3167	0.00320132	18.5853	0.0271315	25.2933	0.10833	-108.059	47.8747	-0.211161	0.49595	-135.167	0.590449	1.70225	-1.80826	Y	Included
PB-31_clumpedLIDI220250217	5	ETH-3	100	98	880	249	113	91	1.03508	29.7847	42	6.42131	0.00199883	12.3648	0.00247267	18.6298	0.0241043	24.9047	0.102913	-38.0498	20.9155	-0.227169	0.021704	-67.3849	0.572843	1.71391	-1.76103	Y	Included
PB-31_clumpedLIDI220250217	6	ETH-1	105	100	887	315	108	91	1.02092	31.0994	39	6.69107	0.00191332	11.8657	0.00378902	18.0524	0.0260936	66.0063	1.83558	-129.179	17.8628	-0.585677	41.1517	-155.158	0.184989	2.01922	-2.252		Included
PB-31_clumpedLIDI220250217	7	ETH-2	95	100	860	264	113	91	1.03588	26.4592	44	-5.34211	0.00175219	-4.91718	0.0041709	-10.9882	0.022037	-5.71758	0.161373	37.0215	27.043	-0.676421	4.13309	53.1098	0.204734	-10.1678	-18.7152		Included
PB-31_clumpedLIDI220250217	8	ETH-3	96	100	860	220	111	91	1.05824	27.0515	44	6.40236	0.00166136	12.4198	0.00337212	18.7099	0.0212897	25.8765	0.0816185	-118.991	17.5021	-0.182506	0.861119	-145.932	0.621129	1.69174	-1.70692		Included
PB-31_clumpedLIDI220250217	9	ETH-4	93	100	850	227	113	91	1.03599	25.3862	50	-5.38725	0.00197237	-5.0454	0.00370807	-10.916	0.0260318	-7.73532	0.0984768	11.821	21.3357	-0.43005	2.35367	27.8284	0.472597	-10.2111	-18.8411		Included
PB-31_clumpedLIDI220250217	10	BTCARB09-T	123	75	831	234	111	93	1.05788	23.4065	55	-1.659	0.00215899	8.48457	0.00369308	6.35721	0.025702	17.4951	0.134526	-163.456	15.5271	-0.256011	0.446318	-175.772	0.591534	-6.74181	-5.55554		Included
PB-31_clumpedLIDI220250217	12	BTCARB05-T	178	55	889	220	113	89	1.03404	31.2998	41	-1.66839	0.00269598	8.35846	0.00526839	6.23945	0.0235107	17.7451	0.143268	-139.478	13.858	-0.240394	0.942442	-151.93	0.609013	-6.74718	-5.67943		Included
PB-31_clumpedLIDI220250217	13	IAEA-603	103	100	877	579	113	91	1.04737	29.8295	43	7.09823	0.00199499	11.743	0.0042687	18.4436	0.0205377	23.8888	0.115258	-102.766	13.8792	-0.499459	0.25873	-129.701	0.277235	2.45695	-2.37346	Y	Included	leak rate above 500 microbar/min.
PB-31_clumpedLIDI220250217	14	ETH-1	101	100	889	183	113	91	1.01877	30.6002	40	6.69652	0.00239606	11.9216	0.00496631	18.1267	0.025763	73.2202	1.40912	-169.206	16.1114	-0.57255	48.0817	-194.083	0.198974	2.02298	-2.19715		Included
PB-31_clumpedLIDI220250217	15	POL2	87	100	843	212	113	89	1.03992	25.5148	47	-2.24802	0.00156817	4.66432	0.00327745	2.08268	0.0259641	13.9227	0.131471	-111.072	21.7788	-0.172559	4.52996	-117.048	0.69981	-7.22835	-9.3078		Included
PB-31_clumpedLIDI220250217	16	BTCARB08-T	108	82	794	249	108	91	1.03684	20.3602	57	-1.74408	0.00188144	8.53539	0.00497632	6.28887	0.0258415	18.5931	0.124846	-172.41	20.2745	-0.28551	1.42505	-184.601	0.559706	-6.83421	-5.50542		Included
PB-31_clumpedLIDI220250217	18	BTCARB09-T	120	74	802	278	111	91	1.0058	21.043	58	-1.64979	0.00209074	8.5263	0.00493312	6.38579	0.0293727	17.479	0.143331	-241.151	16.4816	-0.277809	0.347698	-252.391	0.567692	-6.73355	-5.51455		Included
PB-31_clumpedLIDI220250217	19	ETH-2	100	100	872	227	113	89	1.03433	28.7001	44	-5.33413	0.00126709	-4.8765	0.00323229	-10.9539	0.0237897	-7.57048	0.104775	-61.9019	12.616	-0.690189	2.17989	-47.4329	0.189609	-10.1609	-18.6752		Included
PB-31_clumpedLIDI220250217	20	IAEA-603	83	100	787	227	113	91	1.038	20.3659	60	7.06602	0.00177654	11.7612	0.00371439	18.4677	0.025556	23.8031	0.149544	-178.887	23.1361	-0.46049	0.139109	-203.537	0.319551	2.42202	-2.3555		Included
PB-31_clumpedLIDI220250217	21	ETH-3	89	100	816	212	120	91	1.00588	22.6476	52	6.45916	0.00258852	12.2766	0.00425764	18.6496	0.0238686	25.9073	0.121888	-215.124	18.5952	-0.160881	1.17445	-238.96	0.644912	1.75741	-1.84779		Included
PB-31_clumpedLIDI220250217	22	POL2	97	98	858	359	111	89	1.0344	27.6755	44	-2.24149	0.00164843	4.74021	0.00347903	2.1552	0.0211947	11.0752	0.136746	-109.157	14.2371	-0.181205	1.55745	-115.284	0.690104	-7.22419	-9.23325		Included
PB-31_clumpedLIDI220250217	24	BTCARB08-T	102	87	797	234	108	91	1.03373	20.6021	56	-1.73532	0.00253774	8.55006	0.0043879	6.35595	0.025065	17.9586	0.156056	-269.763	13.5112	-0.242225	0.772132	-280.547	0.606545	-6.82542	-5.49102		Included
PB-31_clumpedLIDI220250217	25	BTCARB05-T	179	55	889	278	118	91	1.0344	31.571	42	-1.68148	0.00151978	8.31743	0.00322582	6.11716	0.0234487	18.4802	0.130426	-59.8781	14.0548	-0.308387	1.74698	-73.3951	0.535507	-6.75961	-5.71971		Included
PB-31_clumpedLIDI220250217	26	ETH-2	105	100	894	330	113	91	1.03409	30.5429	42	-5.35123	0.00166887	-4.86805	0.00330211	-10.9457	0.0238906	-7.6953	0.162024	-51.1296	17.7897	-0.67251	2.03684	-36.4928	0.208817	-10.1794	-18.6669		Included
PB-31_clumpedLIDI220250217	27	ETH-1	103	100	880	315	118	91	1.02559	30.2817	42	6.68478	0.00164371	11.8503	0.00415618	18.053	0.0208913	119.841	1.42107	-275.594	11.5584	-0.563703	93.7643	-297.179	0.208904	2.0131	-2.26713		Included
PB-31_clumpedLIDI220250217	28	ETH-3	91	100	846	242	111	91	1.03357	26.0022	48	6.39211	0.00195778	12.4063	0.00359667	18.7445	0.0263039	31.679	0.14196	-184.299	22.4493	-0.124929	6.54912	-209.213	0.683657	1.68133	-1.72025		Considered as outlier	Outlier sensu peirce for raw D47.
PB-31_clumpedLIDI220250217	30	BTCARB09-T	110	78	777	293	111	89	1.02296	19.3747	60	-1.64938	0.0023945	8.48493	0.00414103	6.3779	0.0302888	19.9862	0.15679	-401.204	14.4798	-0.245751	2.89498	-410.026	0.602618	-6.73159	-5.55521		Included
PB-31_clumpedLIDI220250217	32	ETH-1	98	100	868	264	113	91	1.03187	28.7263	41	6.70633	0.00135312	11.9725	0.00253535	18.1974	0.0234133	97.1552	0.785599	-255.481	6.22407	-0.562654	71.3483	-277.853	0.209457	2.03155	-2.14716		Included
PB-31_clumpedLIDI220250217	33	IAEA-603	82	100	819	220	120	91	1.03662	23.109	55	7.08854	0.00248339	11.7089	0.00478075	18.4816	0.0241555	30.0577	0.11859	-184.187	15.6846	-0.41911	6.35322	-208.617	0.364534	2.44789	-2.40698		Included
PB-31_clumpedLIDI220250217	34	ETH-3	103	100	880	234	113	91	1.03327	29.4405	44	6.46774	0.00138808	12.5945	0.00309666	18.9561	0.019991	27.8107	0.128565	-171.21	14.0335	-0.177436	2.4023	-196.882	0.625642	1.75491	-1.5355		Included
PB-31_clumpedLIDI220250217	37	BTCARB08-T	115	80	833	286	115	91	1.03129	24.1013	50	-1.7297	0.00195535	8.48672	0.0043327	6.3074	0.0257945	18.2409	0.149278	-213.555	15.2139	-0.234537	1.17538	-225.078	0.61511	-6.81712	-5.55327		Included
PB-31_clumpedLIDI220250217	38	ETH-2	93	100	848	337	113	91	1.02143	25.2458	46	-5.34465	0.00188331	-4.84578	0.00317991	-10.8774	0.0242079	-7.27003	0.158144	-98.5707	18.1374	-0.632258	2.42142	-84.7125	0.25235	-10.1732	-18.645	Y	Included
PB-31_clumpedLIDI220250217	39	POL2	96	100	863	337	118	91	1.01576	27.3865	43	-2.22015	0.00187342	4.67014	0.00351076	2.11872	0.0227174	10.775	0.141349	-117.7	17.3498	-0.171117	1.39979	-123.667	0.701233	-7.19891	-9.30214		Included
PB-31_clumpedLIDI220250217	40	ETH-4	108	100	889	227	113	91	1.03103	30.4004	39	-5.37934	0.00120386	-4.98765	0.00316698	-10.8766	0.0199078	-7.49787	0.144182	-38.4385	17.9853	-0.455469	2.47715	-23.346	0.444769	-10.2049	-18.7843		Included
PB-31_clumpedLIDI220250217	41	BTCARB05-T	160	59	855	872	389	91	1.03335	26.7828	48	-1.67823	0.00161017	8.27734	0.00357576	6.15509	0.0222859	18.0454	0.101797	-120.169	19.6653	-0.234985	1.39888	-132.754	0.615245	-6.75468	-5.7591	YY	Included	leak rate above 500 microbar/min.Non Condensable Pressure above 150 microbar.
PB-31_clumpedLIDI220250217	43	BTCARB09-T	131	72	853	249	364	91	1.03392	26.2729	48	-1.65826	0.00149569	8.43125	0.00341396	6.33273	0.0216523	17.3238	0.173656	-171.715	14.4227	-0.229135	0.383653	-183.826	0.620887	-6.73907	-5.60793	Y	Included	Non Condensable Pressure above 150 microbar.
PB-31_clumpedLIDI220250217	44	ETH-1	92	100	858	293	113	91	1.02964	26.9469	46	6.69684	0.00170916	11.9313	0.00463315	18.1734	0.0240134	49.4469	0.361885	-212.349	15.881	-0.536415	24.8456	-235.949	0.238113	2.02296	-2.18761		Included
PB-31_clumpedLIDI220250217	45	ETH-2	89	100	843	249	281	91	1.04809	24.7572	49	-5.34121	0.00183736	-4.89234	0.00380917	-10.9972	0.0210029	-6.40277	0.131721	-95.2962	17.853	-0.710973	3.39102	-81.3066	0.167164	-10.1678	-18.6908	Y	Included	Non Condensable Pressure above 150 microbar.
PB-31_clumpedLIDI220250217	46	ETH-3	87	100	841	330	115	91	1.05708	25.0361	49	6.3821	0.00222345	12.3755	0.00377417	18.6309	0.0227356	26.819	0.188742	-244.22	12.6626	-0.196269	1.8683	-267.252	0.606472	1.6718	-1.75041		Included
PB-32_clumpedLIDI220250219	1	ETH-3	97	95	821	88	123	89	1.03669	27.7625	47	6.49645	0.010481	12.4644	0.0200264	18.8727	0.0524358	26.8306	0.110011	384.774	73.3316	-0.162505	1.7038	342.179	0.666363	1.81589	-1.61724	YY	Considered as outlier	First sample of of the carousel is always spurious
PB-32_clumpedLIDI220250219	2	ETH-3	101	93	831	37	111	89	1.02072	29.129	43	6.41189	0.00199965	12.3914	0.00337539	18.6739	0.0233819	24.7551	0.152203	-16.2377	15.5249	-0.199981	-0.176718	-46.2776	0.627119	1.72847	-1.68894	Y	Considered as outlier	Poor room temperature control during the beginning of the run.
PB-32_clumpedLIDI220250219	3	ETH-3	98	94	816	330	113	89	1.04173	28.2018	45	6.39943	0.00180007	12.2956	0.00357368	18.5132	0.0248026	24.7058	0.137489	-1.1068	20.4596	-0.251907	-0.035599	-31.4159	0.572261	1.71872	-1.78319	Y	Considered as outlier	Poor room temperature control during the beginning of the run.
PB-32_clumpedLIDI220250219	4	ETH-3	94	97	811	249	108	89	1.04729	26.8298	47	6.41545	0.00197956	12.3705	0.00433393	18.5746	0.025751	25.0926	0.180841	-18.8141	21.6707	-0.28086	0.193824	-48.7403	0.541035	1.73304	-1.70949	Y	Considered as outlier	Poor room temperature control during the beginning of the run.
PB-32_clumpedLIDI220250219	5	ETH-3	102	92	831	418	115	89	1.03301	29.3994	42	6.38715	0.00170182	12.3113	0.00430744	18.5439	0.022591	25.1481	0.153346	-9.19406	19.6667	-0.224484	0.364978	-39.2746	0.601461	1.70506	-1.76767	Y	Included
PB-32_clumpedLIDI220250219	6	ETH-1	90	100	806	308	108	89	1.03669	25.8048	46	6.67329	0.00209871	11.8821	0.00397977	18.0455	0.0256124	48.8779	0.358997	-29.3019	27.2822	-0.590177	24.3895	-58.2727	0.212444	2.02562	-2.19072		Included
PB-32_clumpedLIDI220250219	7	ETH-2	101	100	836	330	113	91	1.03453	28.6762	41	-5.35869	0.00166918	-4.91873	0.00307397	-11.0737	0.0215657	-5.3482	0.139436	71.5091	27.4045	-0.744031	4.50927	88.1552	0.170671	-10.174	-18.6994		Included
PB-32_clumpedLIDI220250219	8	ETH-3	100	100	833	242	111	91	1.03726	28.7292	41	6.37978	0.00182479	12.3185	0.00431899	18.5787	0.0261445	26.3967	0.137397	-48.0907	20.8914	-0.189797	1.56915	-76.9961	0.638413	1.69694	-1.76059		Included
PB-32_clumpedLIDI220250219	9	ETH-4	87	100	741	410	111	91	1.03387	19.1079	65	-5.38152	0.00184454	-5.03481	0.0037926	-10.9394	0.0281591	-7.94832	0.122782	47.5564	28.3418	-0.470009	2.11718	64.1003	0.463178	-10.1941	-18.8136		Included
PB-32_clumpedLIDI220250219	10	BTCARB13	140	62	775	330	296	89	1.03528	22.7043	55	-1.2416	0.00167391	7.89599	0.0043103	6.17599	0.0282988	16.7335	0.159616	-79.1317	20.9208	-0.293497	0.865446	-92.0525	0.579798	-6.26004	-6.09623	Y	Included	Non Condensable Pressure above 150 microbar.
PB-32_clumpedLIDI220250219	11	BTCARB24	118	75	789	308	113	89	1.02096	24.0008	51	-2.71126	0.00179142	8.32416	0.00413104	5.07759	0.0274806	17.6754	0.145787	-48.6337	22.2933	-0.283798	0.942017	-61.2924	0.594802	-7.84143	-5.67155		Included
PB-32_clumpedLIDI220250219	12	POL2	90	100	797	330	132	89	1.02607	24.7833	49	-2.20388	0.00160613	4.71823	0.00416406	2.09903	0.0252581	10.1899	0.139612	-23.3051	22.3266	-0.254634	0.724294	-30.0193	0.638553	-7.16839	-9.22167		Included
PB-32_clumpedLIDI220250219	13	IAEA-603	98	100	872	462	113	89	1.02857	36.0306	35	7.07451	0.00174028	11.7083	0.00364177	18.3763	0.0220206	24.6083	0.118178	-20.908	19.567	-0.507427	1.03043	-50.2119	0.299552	2.45942	-2.3627		Included
PB-32_clumpedLIDI220250219	14	ETH-1	110	100	860	205	201	89	1.04754	34.2436	36	6.66911	0.00173082	11.8777	0.00472112	18.0337	0.0201732	112.774	0.648604	-172.579	14.3199	-0.593192	86.8031	-197.263	0.209269	2.02133	-2.19501	Y	Included	Non Condensable Pressure above 150 microbar.
PB-32_clumpedLIDI220250219	15	VIA2	10	100	848	278	113	89	1.05041	31.5215	38	-2.65422	0.0017188	7.18129	0.00284587	4.04258	0.0185301	24.9447	0.123138	-37.5554	22.7403	-0.258279	10.3809	-48.3011	0.62646	-7.73869	-6.7965		Included
PB-32_clumpedLIDI220250219	16	BTCARB18	175	50	775	264	108	89	1.03575	22.9754	50	-1.48941	0.00181627	8.5255	0.00331301	6.51459	0.0284455	21.964	0.114016	-85.3225	28.5119	-0.31479	4.75882	-99.0239	0.555596	-6.54716	-5.47611		Included
PB-32_clumpedLIDI220250219	17	BTCARB24	107	80	760	396	767	89	1.03423	21.345	59	-2.87085	0.00211954	8.09467	0.00404874	4.6568	0.030556	17.2357	0.1264	-97.6864	19.4655	-0.313632	0.965098	-109.142	0.564668	-8.00302	-5.89706	Y	Included	Non Condensable Pressure above 150 microbar.
PB-32_clumpedLIDI220250219	18	BTCARB13	160	56	802	249	111	89	1.03457	25.0865	50	-1.22832	0.00245763	7.89384	0.00380347	6.20001	0.0260632	16.6796	0.151983	-103.534	22.0072	-0.281251	0.816673	-116.121	0.592794	-6.24582	-6.09837		Included
PB-32_clumpedLIDI220250219	19	ETH-2	90	100	802	300	445	89	1.03434	25.1398	49	-5.357	0.00182915	-4.90644	0.00364383	-11.0243	0.0249605	-7.91499	0.134347	6.33186	25.2911	-0.70802	1.89229	21.9387	0.208977	-10.1727	-18.6873	Y	Included	Non Condensable Pressure above 150 microbar.
PB-32_clumpedLIDI220250219	20	IAEA-603	109	100	860	264	108	89	1.03243	33.7696	37	7.08552	0.00181421	11.7425	0.003637	18.4372	0.0222455	24.4071	0.138535	-61.6235	19.0023	-0.49226	0.766058	-89.78	0.315517	2.46989	-2.329		Included
PB-32_clumpedLIDI220250219	21	ETH-3	104	100	841	440	907	89	1.01666	30.9753	39	6.41127	0.00190912	12.3247	0.0034001	18.5737	0.0192184	25.3396	0.126434	-52.1239	23.5669	-0.23297	0.525381	-80.9484	0.59226	1.73026	-1.75458	Y	Included	Non Condensable Pressure above 150 microbar.
PB-32_clumpedLIDI220250219	22	VIA2	107	89	850	286	108	89	1.05492	31.7668	38	-2.66928	0.00175244	7.2138	0.00375287	4.04314	0.0240898	15.824	0.131848	26.631	33.0639	-0.273865	1.32514	15.1206	0.609787	-7.75593	-6.76446		Included
PB-32_clumpedLIDI220250219	24	BTCARB13	140	57	716	300	108	89	1.0223	17.9112	61	-1.21262	0.00168431	7.91989	0.00439842	6.20823	0.0233069	15.7569	0.131572	-318.456	20.4095	-0.314698	-0.143396	-328.071	0.556986	-6.23005	-6.07277		Included
PB-32_clumpedLIDI220250219	25	BTCARB18	169	53	797	440	982	91	1.03517	25.0924	51	-1.64249	0.0016927	8.33131	0.00418529	6.18497	0.0276315	17.3938	0.149421	-94.4963	19.8954	-0.294827	0.650816	-107.577	0.578338	-6.7031	-5.66689	Y	Included	Non Condensable Pressure above 150 microbar.
PB-32_clumpedLIDI220250219	26	ETH-2	103	93	853	271	111	89	1.03787	31.039	41	-5.29964	0.00161595	-4.80144	0.00290278	-10.8899	0.0212283	-7.77601	0.149457	-9.79693	20.3725	-0.73539	1.82121	5.28955	0.179137	-10.1155	-18.5841	Y	Considered as outlier	Outlier sensu peirce for raw D47, rd45, rd46
PB-32_clumpedLIDI220250219	27	ETH-1	85	100	792	549	1034	91	1.0397	24.7238	50	6.66375	0.00160019	11.8403	0.00377955	18.0028	0.0259473	81.9305	0.462932	-246.094	15.9757	-0.581615	56.7578	-268.527	0.221781	2.01699	-2.2319	YY	Included	leak rate above 500 microbar/min.Non Condensable Pressure above 150 microbar.
PB-32_clumpedLIDI220250219	28	ETH-3	92	100	804	462	108	89	1.01595	26.2428	46	6.40123	0.00200289	12.3441	0.00392173	18.5909	0.0254122	28.4068	0.123672	-167.112	18.1671	-0.224663	3.47978	-192.462	0.601071	1.71885	-1.73539		Included
PB-32_clumpedLIDI220250219	29	BTCARB24	113	69	699	982	1195	93	1.03586	16.4142	71	-2.30078	0.00259267	9.03918	0.00473605	6.21882	0.0285833	18.8509	0.180579	-336.283	21.4099	-0.270464	0.678469	-346.312	0.604251	-7.43038	-4.96873	YY	Included	leak rate above 500 microbar/min.Non Condensable Pressure above 150 microbar.
PB-32_clumpedLIDI220250219	31	BTCARB18	178	51	811	535	955	91	1.03083	26.3163	45	-1.63963	0.0016212	8.39539	0.00416328	6.29619	0.0229047	17.6124	0.14163	-121.651	17.9541	-0.249741	0.738676	-134.45	0.626089	-6.70241	-5.60383	YY	Included	leak rate above 500 microbar/min.Non Condensable Pressure above 150 microbar.
PB-32_clumpedLIDI220250219	32	ETH-1	98	100	824	278	111	89	1.02221	27.8502	41	6.66585	0.00195931	11.848	0.00362363	18.0069	0.0227686	113.356	0.522161	-269.936	13.0477	-0.587271	87.4357	-291.672	0.215714	2.01894	-2.22429		Included
PB-32_clumpedLIDI220250219	33	IAEA-603	95	100	875	535	1048	91	1.02425	36.22	36	7.07701	0.00152669	11.7052	0.00417342	18.4138	0.0210247	28.0766	0.137439	-53.7296	20.6185	-0.47025	4.42511	-82.0481	0.339156	2.4622	-2.36576	YY	Included	leak rate above 500 microbar/min.Non Condensable Pressure above 150 microbar.
PB-32_clumpedLIDI220250219	34	ETH-3	8	100	814	330	113	86	1.04004	27.4755	46	6.38008	0.00219821	12.3327	0.00387496	18.5724	0.0262047	26.6486	0.137689	-177.744	20.1447	-0.210046	1.78674	-202.734	0.616783	1.69674	-1.74658		Included
PB-32_clumpedLIDI220250219	36	BTCARB13	160	56	799	344	108	89	1.03247	25.2003	48	-1.23467	0.00206306	7.89905	0.00370381	6.2103	0.0263591	16.7828	0.155946	-155.604	22.8799	-0.269542	0.90792	-167.463	0.605273	-6.25277	-6.09323		Included
PB-32_clumpedLIDI220250219	37	BTCARB24	127	72	814	484	916	91	1.0175	27.0344	44	-2.86573	0.00160219	8.13636	0.00390949	4.75971	0.0254088	16.9678	0.167146	-141.897	17.1976	-0.257176	0.618739	-152.865	0.624616	-7.9991	-5.85604	Y	Included	Non Condensable Pressure above 150 microbar.
PB-32_clumpedLIDI220250219	38	ETH-2	108	100	809	344	106	89	1.03938	25.976	45	-5.35438	0.00184688	-4.87603	0.00338707	-11.0011	0.0279584	-8.01004	0.128964	-70.9001	21.1349	-0.717289	1.73507	-56.5503	0.198966	-10.171	-18.6574		Included
PB-32_clumpedLIDI220250219	39	VIA2	96	96	821	308	626	89	1.02453	27.4156	42	-2.66172	0.00188594	7.19063	0.00342102	4.05388	0.0259719	15.738	0.136378	-126.187	19.724	-0.248382	1.28647	-135.952	0.636997	-7.74703	-6.78728	Y	Included	Non Condensable Pressure above 150 microbar.
PB-32_clumpedLIDI220250219	40	ETH-4	97	100	821	278	111	89	1.02344	26.6131	42	-5.03281	0.00168537	-4.52007	0.00364352	-10.0476	0.0224756	-7.28483	0.143361	-86.9612	19.9501	-0.439004	1.75063	-73.83	0.492579	-9.8416	-18.3078		Included
PB-32_clumpedLIDI220250219	41	BTCARB18	166	54	797	872	1034	91	1.0344	24.9467	51	-1.63938	0.00177295	8.37567	0.0041657	6.24693	0.0222162	17.7139	0.12431	-113.131	20.6101	-0.279722	0.877599	-126.021	0.594232	-6.70142	-5.62324	YY	Included	leak rate above 500 microbar/min.Non Condensable Pressure above 150 microbar.
PB-32_clumpedLIDI220250219	43	POL2	106	90	846	637	1161	93	1.03531	30.3191	41	-2.24557	0.00176269	4.63214	0.00330733	1.99377	0.0235156	10.6242	0.144752	-76.1168	18.7206	-0.232317	1.32615	-82.2725	0.662866	-7.20965	-9.3063	YY	Included	leak rate above 500 microbar/min.Non Condensable Pressure above 150 microbar.
PB-32_clumpedLIDI220250219	44	ETH-1	102	100	836	374	111	89	1.02183	29.6109	41	6.6734	0.00159023	11.8813	0.00428804	17.9992	0.0242746	92.9784	0.453256	-239.473	11.6219	-0.634967	67.4621	-262.17	0.164735	2.02576	-2.19151		Included
PB-32_clumpedLIDI220250219	45	ETH-2	100	100	831	667	1156	91	1.04527	28.046	43	-5.3464	0.00159622	-4.89251	0.00341155	-10.9961	0.0192302	-5.16581	0.159827	-40.2711	20.6217	-0.704328	4.64052	-25.4248	0.212807	-10.1619	-18.6736	YY	Included	leak rate above 500 microbar/min.Non Condensable Pressure above 150 microbar.
PB-32_clumpedLIDI220250219	46	ETH-3	102	100	831	374	111	89	1.02693	29.1516	41	6.38678	0.00178633	12.3515	0.00378059	18.5824	0.02427	26.4492	0.142417	-134.48	16.8996	-0.22532	1.55508	-160.822	0.600404	1.7032	-1.72814		Included
PB-5_clumpedLIDI220240626bis	1	BDH	109	93	770	95	252	71	1.03694	39.4272	42	6.64587	0.0128131	12.1145	0.0298586	18.1266	0.0250022	29.6721	0.379051	142.128	47.9987	-0.708131	5.17034	107.573	0.097778	2.01034	-1.84041	YY	Considered as outlier	Non Condensable Pressure above 150 microbar. First sample of of the carousel is always spurious
PB-5_clumpedLIDI220240626bis	2	BDH	95	11	86	51	179	74	0.00739155	0.130246	100	16.4206	0.164534	21.9314	0.614106	307.569	4.45063	32464.4	371.68	499500	11254.3							YYYYYY	Rejected	Sample pressure too low (<600 microbar).Bad adjustment between the belows.Non Condensable Pressure above 150 microbar.Extreme bellow position.
PB-5_clumpedLIDI220240626bis	3	BDH	91	100	733	286	545	76	1.03957	33.2325	47	6.79818	0.0242443	11.995	0.0166565	18.6268	0.0581668	29.8697	2.19404	762.265	199.09	-0.25707	5.60076	709.069	0.584759	2.17781	-1.95928	YY	Considered as outlier	Non Condensable Pressure above 150 microbar. Outlier sensu peirce for raw D47.
PB-5_clumpedLIDI220240626bis	4	BDH	86	100	711	462	91	71	1.03617	29.3311	52	6.63653	0.00562415	12.0925	0.013281	18.3643	0.0525987	24.5182	0.324339	2511.4	411.127	-0.443895	0.182551	2405.34	0.383385	2.00115	-1.86217	Y	Included
PB-5_clumpedLIDI220240626bis	5	BDH	90	100	750	696	1100	79	1.03712	35.2098	43	6.56536	0.00379815	12.0624	0.0124131	18.1063	0.0368029	21.7493	0.143325	-414.78	207.242	-0.59495	-2.46113	-432.38	0.22084	1.92606	-1.89192	YYY	Considered as outlier	leak rate above 500 microbar/min.Non Condensable Pressure above 150 microbar.
PB-5_clumpedLIDI220240626bis	6	ETH-1	99	100	753	139	91	71	1.03804	35.3423	43	6.66503	0.00257572	11.8737	0.0120162	17.9005	0.0285429	25.4638	0.593538	14.3649	19.53	-0.715883	1.53872	-15.8844	0.090703	2.03972	-2.0792		Considered as outlier	Outlier sensu peirce for raw D47, rd46
PB-5_clumpedLIDI220240626bis	7	ETH-2	101	100	750	234	196	74	1.03593	34.0851	43	-5.20784	0.00210624	-4.68187	0.0124693	-10.7511	0.0285142	-9.2641	0.136274	51.1312	4.13922	-0.80829	0.078416	66.7892	0.160855	-10.0595	-18.4678	Y	Included	Non Condensable Pressure above 150 microbar.
PB-5_clumpedLIDI220240626bis	8	ETH-3	100	100	745	198	167	74	1.02927	33.8602	43	6.34316	0.00208204	12.2633	0.00956244	18.392	0.0288718	23.7203	0.107073	-18.0899	5.14354	-0.281958	-0.933667	-47.7674	0.559122	1.68077	-1.69215	Y	Considered as outlier	Non Condensable Pressure above 150 microbar. Outlier sensu peirce for raw D47.
PB-5_clumpedLIDI220240626bis	9	18CIC10	210	46	733	212	106	74	1.03794	31.669	50	-0.825947	0.00184321	8.0718	0.0101929	6.73336	0.0257714	16.6943	0.100929	-17.2924	4.32085	-0.340463	0.4778	-31.8424	0.564962	-5.84018	-5.83204		Included
PB-5_clumpedLIDI220240626bis	10	18CIC11	191	56	824	190	93	74	1.03168	47.6408	34	-1.90958	0.00156791	7.39397	0.00711015	4.88374	0.0234859	16.1076	0.162633	-4.78436	4.08258	-0.398485	1.24646	-17.0866	0.512945	-6.97533	-6.5017		Included
PB-5_clumpedLIDI220240626bis	12	18CIC09	169	56	726	388	89	74	1.03775	30.2376	50	-1.65826	0.0017728	7.83346	0.00796279	5.66387	0.0273822	16.1407	0.172745	-39.7483	6.95548	-0.311053	0.405969	-52.685	0.603273	-6.72248	-6.06649		Included
PB-5_clumpedLIDI220240626bis	13	BDH	80	100	689	674	1080	79	1.05303	25.7604	57	6.53798	0.00192436	12.0182	0.00751607	18.1226	0.0261413	24.4792	0.195629	-67.2481	6.27522	-0.508029	0.291293	-95.1959	0.31516	1.89837	-1.9356	YY	Included	leak rate above 500 microbar/min.Non Condensable Pressure above 150 microbar.
PB-5_clumpedLIDI220240626bis	14	ETH-1	114	100	794	176	93	74	1.02955	43.444	34	6.64797	0.00172736	11.7669	0.00620716	17.9011	0.0206007	49.0751	1.98808	-72.5569	7.13267	-0.594086	24.8156	-100.011	0.222999	2.0254	-2.1851		Included
PB-5_clumpedLIDI220240626bis	15	IAEA-603	80	100	694	220	91	74	1.03559	26.3126	53	7.05981	0.00184832	11.6727	0.00611402	18.34	0.0260035	26.3586	0.189818	-79.0797	5.19259	-0.493479	2.81098	-106.567	0.32967	2.46979	-2.2794		Included
PB-5_clumpedLIDI220240626bis	16	ETH-4	104	100	772	147	93	76	1.0335	36.9797	38	-5.40507	0.00113645	-5.06124	0.00465422	-11.0633	0.0196893	-7.89908	0.211671	-7.77732	3.80293	-0.544746	2.22016	7.97075	0.448985	-10.2566	-18.8435		Included
PB-5_clumpedLIDI220240626bis	17	18CIC10	205	46	723	278	433	76	1.04031	29.4073	54	-0.851962	0.00174374	8.0268	0.00583391	6.71698	0.0220637	18.5911	0.1715	-69.0958	4.44088	-0.286005	2.43386	-82.773	0.624214	-5.86637	-5.8766	Y	Included	Non Condensable Pressure above 150 microbar.
PB-5_clumpedLIDI220240626bis	18	18CIC11	215	51	838	205	96	76	1.02755	52.5055	31	-1.91754	0.00257475	7.38221	0.00232677	5.04809	0.709973	17.3209	0.286256	-19.4046	2.1052							Y	Rejected	Mass 47 voltage too high (>50 V).
PB-5_clumpedLIDI220240626bis	19	BTCARB28	134	72	736	945	1226	84	1.03366	30.8544	50	-0.766426	0.00167667	12.5836	0.00495259	9.90754	0.417885	25.3034	0.320807	-53.6622	4.00279							YY	Rejected	leak rate above 500 microbar/min.Non Condensable Pressure above 150 microbar.
PB-5_clumpedLIDI220240626bis	20	18CIC09	137	77	806	176	98	76	1.03361	44.269	35	-1.61877	0.00118107	7.99852	0.00469848	5.81339	0.021677	17.2568	0.339321	-24.2461	2.35937	-0.364172	1.17688	-37.7419	0.544683	-6.6863	-5.90292		Included
PB-5_clumpedLIDI220240626bis	21	BDH	119	100	816	315	465	76	1.0402	47.4633	33	6.55785	0.00150372	12.0038	0.00419185	18.0968	0.0233884	25.9796	0.403059	-45.5739	2.14857	-0.539676	1.78491	-74.1645	0.280936	1.92019	-1.95001	Y	Included	Non Condensable Pressure above 150 microbar.
PB-5_clumpedLIDI220240626bis	22	VIA1	96	100	758	198	98	76	1.03648	34.4779	42	-2.46692	0.00223806	7.03765	0.00496232	4.06897	0.017526	16.899	0.11783	-44.9867	5.55492	-0.285527	2.73546	-55.5738	0.640493	-7.55888	-6.85375		Included
PB-5_clumpedLIDI220240626bis	23	ETH-2	110	100	784	227	93	76	1.0355	38.5066	37	-5.36827	0.00162067	-4.99569	0.00363937	-11.1853	0.0197863	-8.02157	0.254946	-22.1734	3.89024	-0.770964	1.96439	-6.82157	0.203984	-10.2196	-18.7786		Included
PB-5_clumpedLIDI220240626bis	24	ETH-3	103	100	767	205	101	76	1.05512	36.0656	40	6.37873	0.00195302	12.266	0.00377361	18.5119	0.0244249	25.6814	0.361455	-62.7123	3.35548	-0.203267	0.974978	-91.08	0.643885	1.71875	-1.68962		Included
PB-5_clumpedLIDI220240626bis	26	18CIC10	200	47	728	198	98	71	1.0399	29.3858	54	-0.806986	0.0049497	8.10432	0.0119618	6.78591	0.030347	20.6182	0.189385	-44.02	7.40185	-0.339569	4.27431	-58.2531	0.56562	-5.82108	-5.79984		Included
PB-5_clumpedLIDI220240626bis	31	ETH-1	101	99	763	425	93	71	1.03951	37.7666	43	6.79356	0.0203658	11.9856	0.0351468	18.0508	0.035131	172.927	6.59928	-80.5266	20.0381	-0.80859	145.308	-108.261	-0.010894	2.1732	-1.96851	Y	Considered as outlier	Outlier sensu peirce for raw D47, rd45, rd46 and stable isotopes
PB-5_clumpedLIDI220240626bis	32	18CIC11	220	50	846	227	93	74	1.03351	52.6032	30	-1.81151	0.00124522	7.66626	0.00251464	5.17554	0.702762	34.0569	0.642578	-39.5964	3.25243							Y	Rejected	Mass 47 voltage too high (>50 V).
PB-5_clumpedLIDI220240626bis	33	18CIC09	176	54	728	242	91	71	1.03062	31.8561	48	-1.62568	0.00297955	7.70615	0.00350713	4.68931	0.330284	28.7089	0.249764	-1091.8	193.157								Rejected	Software or hardware error during the acquisition and/or non steady signal through the acquisition process
PB-5_clumpedLIDI220240626bis	34	BDH	114	100	789	352	111	71	1.03378	44.0186	35	6.56728	0.00255198	11.9365	0.00339539	17.9075	0.0396865	22.3795	0.254739	-157.669	91.5847								Rejected	Software or hardware error during the acquisition and/or non steady signal through the acquisition process
PB-5_clumpedLIDI220240626bis	35	ETH-4	80	100	697	249	86	71	1.03457	27.3599	52	-5.4256	0.00257242	-5.18732	0.00348831	-11.1634	0.0241277	-9.96569	0.219426	-141.414	28.5781	-0.500087	0.385982	-127.551	0.49809	-10.2739	-18.9685		Included
PB-5_clumpedLIDI220240626bis	36	ETH-1	100	100	758	747	797	74	1.0354	37.6994	39	6.63882	0.00255395	11.7287	0.00330917	17.7803	0.0245733	99.7445	3.58961	-142.906	5.0103	-0.666257	74.3943	-168.208	0.145324	2.017	-2.22293	YY	Included	leak rate above 500 microbar/min.Non Condensable Pressure above 150 microbar.
PB-5_clumpedLIDI220240626bis	37	18CIC09	144	61	667	278	86	71	1.03265	24.2698	57	-1.67798	0.00212984	7.72023	0.00356404	5.51702	0.0242371	23.4352	0.5221	-155.976	5.22041	-0.326251	7.814	-167.146	0.587639	-6.73941	-6.17872		Included
PB-5_clumpedLIDI220240626bis	39	18CIC11	206	52	814	593	86	71	1.03854	50.5164	33	-1.91252	0.00177936	7.27539	0.00364646	4.7376	0.0216371	18.2157	0.124648	-21.7725	5.19085	-0.425148	3.55997	-33.6381	0.484852	-6.9741	-6.61927	YY	Considered as outlier	Mass 47 voltage too high (>50 V).leak rate above 500 microbar/min.
PB-5_clumpedLIDI220240626bis	40	18CIC10	213	45	733	549	1014	76	1.03526	30.7882	50	-0.680181	0.00206257	8.52474	0.00381997	7.2928	0.029665	16.9708	0.15602	-64.8945	5.38401	-0.377042	-0.148845	-79.6956	0.521899	-5.70083	-5.38327	YY	Considered as outlier	leak rate above 500 microbar/min.Non Condensable Pressure above 150 microbar.
PB-5_clumpedLIDI220240626bis	41	BDH	105	100	767	249	89	71	1.03646	39.3063	40	6.55698	0.00172155	11.9653	0.00355302	18.0036	0.019892	25.145	0.203587	-78.4407	4.2845	-0.592914	1.04601	-105.979	0.223662	1.92067	-1.98812		Considered as outlier	Outlier sensu peirce for rd46 and rd47.
PB-5_clumpedLIDI220240626bis	42	ETH-1	86	100	687	425	863	74	1.03731	26.2994	56	6.63009	0.00175994	11.7317	0.00445171	17.8199	0.0207547	28.6323	0.380536	-118.198	6.71592	-0.621328	4.91528	-144.227	0.193891	2.00755	-2.21992	Y	Included	Non Condensable Pressure above 150 microbar.
PB-5_clumpedLIDI220240626bis	43	ETH-2	90	100	709	703	86	71	1.03337	28.1273	51	-5.37799	0.00222296	-5.00533	0.00438259	-11.1632	0.0221414	-7.07854	0.149572	-82.4192	5.33138	-0.728968	2.93635	-67.9858	0.24947	-10.2296	-18.7881	Y	Included	leak rate above 500 microbar/min.
PB-5_clumpedLIDI220240626bis	44	ETH-3	103	100	767	440	880	76	1.03425	38.2427	39	6.38183	0.00151304	12.2651	0.0034775	18.4538	0.023139	25.8638	0.233858	-72.2644	2.83439	-0.262647	1.15464	-100.344	0.57973	1.7221	-1.69046	Y	Considered as outlier	Non Condensable Pressure above 150 microbar. Outlier sensu peirce for raw D47.
PB-5_clumpedLIDI220240626bis	45	18CIC09	152	61	706	271	89	74	1.03337	27.6179	51	-1.67189	0.00198447	7.74087	0.00477959	5.56461	0.0227004	16.2895	0.33011	-92.4141	2.84091	-0.305354	0.736329	-104.467	0.610054	-6.73366	-6.15827		Included
PB-5_clumpedLIDI220240626bis	47	18CIC11	201	54	824	256	93	76	1.04372	49.7955	34	-1.87967	0.0013163	7.33651	0.00372804	4.89672	0.0180071	18.8756	0.238842	-53.0054	3.7038	-0.360424	4.08855	-64.6366	0.554211	-6.94119	-6.55874		Included
PB-5_clumpedLIDI220240626bis	48	18CIC10	215	46	753	447	894	76	1.03559	32.2533	48	-0.664712	0.00189859	8.52733	0.00391032	7.34846	0.0210933	18.3556	0.231447	-89.0589	5.32385	-0.340302	1.2075	-103.497	0.561475	-5.68436	-5.38073	Y	Included	Non Condensable Pressure above 150 microbar.
PB-5_clumpedLIDI220240626bis	49	IAEA-603	110	100	789	278	93	76	1.03387	42.124	38	7.04709	0.00155881	11.6235	0.00420189	18.2253	0.0204174	24.8396	0.293627	-74.2409	4.24542	-0.545231	1.42422	-101.775	0.274137	2.45799	-2.32815		Included
PB-5_clumpedLIDI220240626bis	50	BDH	87	100	721	381	731	76	1.03436	29.7398	50	6.5509	0.0021071	12.0048	0.00430754	18.142	0.0231439	25.7115	0.388609	-114.345	3.32166	-0.48911	1.52117	-140.871	0.335594	1.91271	-1.94899	Y	Included	Non Condensable Pressure above 150 microbar.
PB-6_clumpedLIDI220240715_re	1	BDH	88	100	750	37	98	79	1.03978	30.7477	52	6.57159	0.00895465	11.9402	0.0187321	18.0024	0.0282663	29.5938	0.156169	58.3057	20.4102	-0.584657	5.44022	26.7151	0.184193	2.0282	-2.02296	Y	Considered as outlier	First sample of of the carousel is always spurious
PB-6_clumpedLIDI220240715_re	2	BDH	96	100	770	125	103	79	1.03609	30.101	52	6.52185	0.00216185	11.9219	0.00383253	17.9877	0.0275607	24.1936	0.557918	-13.2069	3.59355	-0.530369	0.202826	-42.5785	0.25182	1.97553	-2.0408	Y	Considered as outlier	Poor room temperature control during the beginning of the run.
PB-6_clumpedLIDI220240715_re	3	BDH	99	100	782	278	460	81	1.03629	34.4655	45	6.54297	0.00183088	11.9465	0.00308817	17.9347	0.0231074	25.7705	0.465205	-16.1094	3.44545	-0.627914	1.6941	-45.4615	0.130675	1.99728	-2.01672	YY	Considered as outlier	Non Condensable Pressure above 150 microbar.Poor room temperature control during the beginning of the run.
PB-6_clumpedLIDI220240715_re	4	BDH	113	92	814	190	96	81	1.03949	40.6959	39	6.54775	0.00152651	11.9551	0.00299618	18.0193	0.0195197	27.1932	0.50842	-48.9647	3.61458	-0.558139	3.06638	-77.3567	0.217116	2.00209	-2.00829	Y	Considered as outlier	Poor room temperature control during the beginning of the run.
PB-6_clumpedLIDI220240715_re	5	IAEA-603	90	100	763	205	98	79	1.03707	32.0929	47	7.04273	0.00169691	11.608	0.00395298	18.1533	0.0214208	25.0387	0.438959	-29.4554	4.02753							Y	Rejected	Software or hardware error during the acquisition and/or non steady signal through the acquisition process
PB-6_clumpedLIDI220240715_re	6	ETH-1	98	100	767	110	93	79	1.02631	32.728	45	6.64734	0.00227685	11.7451	0.00422752	17.7658	0.0246949	75.4492	0.258962	-66.9764	3.86385	-0.705091	50.6249	-94.5569	0.035411	2.11664	-2.21454		Considered as outlier	Outlier sensu peirce for raw D47. Poor room temperature control during the beginning of the run.
PB-6_clumpedLIDI220240715_re	7	ETH-2	82	100	719	220	93	79	1.03634	24.7577	56	-5.39221	0.0016974	-5.02608	0.00341908	-11.3002	0.0212968	-1.59341	0.242962	28.5962	8.44738	-0.832245	8.51885	44.8346	0.011478	-10.1737	-18.6431		Considered as outlier	Outlier sensu peirce for raw D47. Poor room temperature control during the beginning of the run.
PB-6_clumpedLIDI220240715_re	8	ETH-3	100	100	748	154	93	79	1.03432	29.1291	49	6.3442	0.00209521	12.2035	0.00476453	18.3644	0.0250963	27.8877	0.226844	-56.0221	8.66233	-0.251999	3.25202	-84.4477	0.596501	1.77462	-1.76413		Included
PB-6_clumpedLIDI220240715_re	9	ETH-4	90	100	748	205	93	79	1.04195	28.3992	55	-5.43152	0.00170224	-5.17844	0.0031914	-11.147	0.0252299	-4.77072	0.275262	-38.1382	3.49741	-0.486207	5.61732	-22.6181	0.441401	-10.2102	-18.7925		Included
PB-6_clumpedLIDI220240715_re	10	BTCARB10	121	77	731	125	96	79	1.04273	27.3343	57	-1.4598	0.00198181	8.35345	0.00348473	6.34881	0.023073	18.8368	0.38575	-53.1218	3.79672	-0.342383	2.02612	-67.0223	0.539542	-6.45251	-5.52427		Included
PB-6_clumpedLIDI220240715_re	11	BTCARB11	171	57	767	300	504	79	1.03649	32.3616	48	-1.51626	0.00153839	7.94106	0.00355391	5.89732	0.0271241	18.8786	0.423768	-57.7247	3.979	-0.330647	2.8873	-70.7551	0.556233	-6.49782	-5.92877	Y	Included	Non Condensable Pressure above 150 microbar.
PB-6_clumpedLIDI220240715_re	12	ETH-3	84	100	694	161	93	79	1.03342	23.5922	63	6.01397	0.00173282	12.1642	0.00347598	17.9989	0.025936	25.3156	0.406636	-78.6848	5.13785	-0.234246	0.819214	-106.047	0.620282	1.42192	-1.80195	Y	Included
PB-6_clumpedLIDI220240715_re	13	IAEA-603	110	100	794	256	216	79	1.03702	37.5999	41	7.04497	0.00151404	11.5953	0.0033835	18.2203	0.019987	26.0632	0.474346	-77.8861	3.80235	-0.520585	2.67582	-105.26	0.262921	2.5486	-2.36242	Y	Included	Non Condensable Pressure above 150 microbar.
PB-6_clumpedLIDI220240715_re	14	BTCARB10	128	74	743	396	89	76	1.03642	28.9361	51	-1.47825	0.00173285	8.38438	0.00354733	6.37214	0.0246927	18.6856	0.39586	-68.1853	5.0632	-0.330277	1.81599	-81.9019	0.554499	-6.47344	-5.49389		Included
PB-6_clumpedLIDI220240715_re	15	BTCARB11	162	62	789	227	93	79	1.03832	35.7328	41	-1.52378	0.0015191	7.91626	0.00299965	5.84865	0.0231702	19.0644	0.402022	-73.055	3.93899	-0.347052	3.11965	-85.8219	0.536043	-6.50497	-5.95309		Included
PB-6_clumpedLIDI220240715_re	16	ETH-1	85	100	706	168	93	76	1.03594	24.8388	56	6.64737	0.00216147	11.7578	0.00430127	17.9254	0.0237637	59.7967	0.250553	-173.189	5.52052	-0.560842	35.3077	-197.65	0.214186	2.1162	-2.20207		Included
PB-6_clumpedLIDI220240715_re	17	ETH-2	105	100	787	220	96	79	1.03945	35.1495	45	-5.37903	0.00150852	-5.07282	0.00321833	-11.1827	0.0213015	-1.50297	0.325978	-68.4661	4.41885	-0.681027	8.70497	-53.686	0.199121	-10.1578	-18.689		Included
PB-6_clumpedLIDI220240715_re	18	ETH-3	0	100	784	440	91	79	1.03962	36.0456	44	6.39306	0.0016884	12.245	0.00340475	18.5263	0.0284314	29.281	0.372611	-115.051	4.45874	-0.183382	4.52959	-141.812	0.681144	1.82549	-1.72354		Included
PB-6_clumpedLIDI220240715_re	19	BTCARB10	137	72	767	234	96	76	1.03874	32.3063	48	-1.4776	0.00177174	8.36155	0.00312323	6.49169	0.0220372	21.0699	0.342838	-115.962	5.84254								Rejected	Poor room temperature control during the second part of the run.
PB-6_clumpedLIDI220240715_re	20	BTCARB11	146	67	770	212	93	79	1.02243	33.2911	45	-1.51511	0.00182602	7.95729	0.00421124	6.02748	0.0197675	19.2591	0.387267	-112.584	6.8103								Rejected	Poor room temperature control during the second part of the run.
PB-6_clumpedLIDI220240715_re	21	BTCARB10	84	100	750	161	93	79	1.03864	30.2368	49	-1.49549	0.00151428	8.37684	0.00346589	6.46433	0.0233679	19.838	0.317127	-123.024	6.63798								Rejected	Poor room temperature control during the second part of the run.
PB-6_clumpedLIDI220240715_re	23	BTCARB11	172	60	804	293	93	76	1.03674	39.6436	41	-1.41778	0.0166687	8.10348	0.0311639	6.47825	0.101302	24.4306	0.316604	94.444	68.8695								Rejected	Poor room temperature control during the second part of the run.
PB-6_clumpedLIDI220240715_re	24	ETH-1	120	100	794	198	89	79	1.04771	38.2552	42	6.66757	0.00201088	11.7765	0.0041421	18.123	0.0221647	809.333	4.63143	-1188.08	4.65422								Rejected	Poor room temperature control during the second part of the run.
PB-6_clumpedLIDI220240715_re	25	ETH-2	100	100	802	462	91	76	1.03686	38.8381	40	-5.38067	0.0014059	-5.02969	0.00326544	-10.9967	0.0165987	35.1948	0.535761	-199.666	6.35974	-0.533911	45.6872	-187.035	0.381341	-10.1612	-18.6466		Considered as outlier	Outlier sensu peirce for raw D47, rd48
PB-6_clumpedLIDI220240715_re	26	ETH-3	87	100	723	198	89	76	1.03676	27.9721	53	6.37034	0.00200549	12.221	0.00338146	18.6534	0.0252984	46.2721	0.469826	-298.082	9.31349								Rejected	Poor room temperature control during the second part of the run.
PB-6_clumpedLIDI220240715_re	27	BTCARB10	132	73	755	447	843	79	1.03786	31.8389	47	-1.4858	0.001826	8.35445	0.00323606	6.51047	0.0246501	24.8445	0.195009	-192.241	7.71161							Y	Rejected	Poor room temperature control during the second part of the run.
PB-6_clumpedLIDI220240715_re	29	ETH-3	84	100	714	249	89	81	1.03832	26.7155	58	6.25944	0.00512678	11.9264	0.00942574	18.1329	0.0267179	26.4552	0.251446	-121.198	9.39076	-0.12329	2.40255	-147.126	0.757744	1.69394	-2.03582		Considered as outlier	Outlier sensu peirce for raw D47, rd45, rd46, rd47. Poor room temperature control during the second part of the run.
PB-6_clumpedLIDI220240715_re	30	BTCARB11	145	67	758	161	91	76	1.03813	30.8324	50	-1.51958	0.00167553	7.9214	0.00293643	6.06806	0.0237715	22.8864	0.331179	-301.399	3.28733								Rejected	Poor room temperature control during the second part of the run.
PB-6_clumpedLIDI220240715_re	31	ETH-3	90	100	731	476	831	76	1.05217	29.0076	53	6.36433	0.0021417	12.2268	0.0039291	18.6579	0.0243259	27.7738	0.276201	-268.247	4.82339							Y	Rejected	Non Condensable Pressure above 150 microbar. Poor room temperature control during the second part of the run.
PB-6_clumpedLIDI220240715_re	32	BTCARB10	142	69	770	147	89	76	1.03768	34.9724	44	-1.47898	0.00168527	8.36795	0.00286082	6.4997	0.0161884	19.699	0.194479	-185.733	9.50734								Rejected	Poor room temperature control during the second part of the run.
PB-6_clumpedLIDI220240715_re	33	BTCARB11	150	63	743	242	152	74	1.03729	30.5989	49	-1.52096	0.00159903	7.95992	0.00373233	6.07252	0.0169407	22.1821	0.21643	-259.744	5.27065							Y	Rejected	Non Condensable Pressure above 150 microbar. Poor room temperature control during the second part of the run.
PB-6_clumpedLIDI220240715_re	34	ETH-1	100	100	743	681	853	76	1.03826	30.9444	48	6.63788	0.00163837	11.7649	0.00455214	18.0118	0.0221126	71.6216	0.299731	-311.692	6.87698							YY	Rejected	leak rate above 500 microbar/min.Non Condensable Pressure above 150 microbar. Poor room temperature control during the second part of the run.
PB-6_clumpedLIDI220240715_re	35	ETH-2	105	100	760	234	89	74	1.03719	33.1376	43	-5.39011	0.00162856	-5.04249	0.00312149	-11.0579	0.0213981	0.470899	0.232344	-207.517	4.98862	-0.573283	10.6374	-194.982	0.332627	-10.1708	-18.6592		Considered as outlier	Outlier sensu peirce for raw D47. Poor room temperature control during the second part of the run.
PB-6_clumpedLIDI220240715_re	37	ETH-4	80	100	665	242	86	71	1.0377	22.2452	68	-5.40614	0.00413583	-5.14777	0.00702492	-10.8685	0.0287056	-4.17213	0.18152	-250.741	8.38594	-0.26131	6.16012	-238.718	0.71999	-10.1841	-18.7624		Considered as outlier	Outlier sensu peirce for raw D47. Poor room temperature control during the second part of the run.
PB-6_clumpedLIDI220240715_re	38	BTCARB10	137	73	780	659	1102	81	1.0358	33.9836	46	-1.48549	0.00156754	8.38798	0.00221217	6.56497	0.0211042	21.5651	0.256112	-219.628	4.82915							YY	Rejected	leak rate above 500 microbar/min.Non Condensable Pressure above 150 microbar. Poor room temperature control during the second part of the run.
PB-6_clumpedLIDI220240715_re	40	ETH-3	98	100	763	615	84	71	1.03862	35.841	45	6.45863	0.0160432	12.4042	0.0272022	18.679	0.0237352	29.5737	0.175176	-9.27126	58.9645							Y	Rejected	leak rate above 500 microbar/min. Poor room temperature control during the second part of the run.
PB-6_clumpedLIDI220240715_re	41	BTCARB10	131	73	748	315	91	74	1.03701	30.6273	50	-1.50017	0.00221911	8.36626	0.00377724	6.49487	0.0255765	20.8767	0.221731	-240.897	10.3657								Rejected	Poor room temperature control during the second part of the run.
PB-6_clumpedLIDI220240715_re	42	BTCARB11	147	65	748	176	89	74	1.04284	31.7123	48	-1.51946	0.00190262	7.95275	0.003758	6.05495	0.0208	19.2359	0.259836	-245.126	8.16366								Rejected	Poor room temperature control during the second part of the run.
PB-6_clumpedLIDI220240715_re	43	ETH-3	105	100	758	278	91	76	1.01682	33.369	45	6.38496	0.00215759	12.2241	0.00363193	18.5684	0.019818	27.0734	0.22978	-231.074	6.40596	-0.113505	2.41646	-254.29	0.767908	1.81757	-1.74402		Considered as outlier	Outlier sensu peirce for raw D47. Poor room temperature control during the second part of the run.
PB-6_clumpedLIDI220240715_re	44	ETH-1	107	100	770	168	91	76	1.02739	34.6753	43	6.65319	0.00235514	11.7289	0.00318694	17.9817	0.022312	90.7296	0.330236	-283.65	4.71145								Rejected	Poor room temperature control during the second part of the run.
PB-6_clumpedLIDI220240715_re	45	ETH-2	105	100	777	271	86	76	1.02419	35.1516	41	-5.39016	0.00155455	-5.05463	0.0031499	-11.1376	0.0223856	1.26376	0.219711	-141.981	6.51459	-0.641772	11.463	-128.389	0.247763	-10.1704	-18.6711		Included	Poor room temperature control during the second part of the run.
PB-6_clumpedLIDI220240715_re	46	ETH-3	81	100	709	190	91	74	1.03547	26.4078	53	6.3625	0.00201289	12.2117	0.00404842	18.5364	0.027662	29.4982	0.261751	-253.594	5.86018	-0.109807	4.8077	-276.095	0.772658	1.79395	-1.75614		Considered as outlier	Outlier sensu peirce for raw D47. Poor room temperature control during the second part of the run.
PB-6_clumpedLIDI220240715_re	47	IAEA-603	100	100	792	234	96	76	1.03406	39.0162	37	7.05119	0.0016495	11.6251	0.00305363	18.3116	0.0216705	27.6275	0.331717	-171.006	4.86632								Rejected	Poor room temperature control during the second part of the run.
PB-6_clumpedLIDI220240715_re	48	BDH	107	100	799	168	93	76	1.03828	39.7202	41	6.54285	0.00205855	11.9458	0.00420409	18.0869	0.0182839	28.9129	0.263677	-162.151	7.65511	-0.47771	4.76409	-187.145	0.316895	1.99717	-2.01738		Included	Poor room temperature control during the second part of the run.
PB-6_clumpedLIDI220240715_re	49	BTCARB11	162	62	780	425	93	76	1.03796	35.6313	44	-1.51942	0.00187071	7.92427	0.00356088	5.99598	0.0205702	19.9552	0.301836	-172.063	8.64626								Rejected	Poor room temperature control during the second part of the run.
PB-7_clumpedLIDI220240717kfactor0	1	ETH-3	115	88	775	51	93	76	1.03992	39.0066	42	6.39893	0.016415	12.1816	0.0247141	18.3454	0.0349383	29.0116	0.355942	91.3704	34.242							Y	Rejected	First sample of of the carousel is always spurious
PB-7_clumpedLIDI220240717kfactor0	2	ETH-3	80	100	697	37	89	71	1.03628	23.7808	64	6.44767	0.00208953	12.3009	0.0073929	18.5358	0.0222497	25.8297	0.164225	-12.5863	7.71453	-0.284392	1.05059	-42.606	0.573613	1.78833	-1.67296	YY	Included
PB-7_clumpedLIDI220240717kfactor0	3	ETH-3	80	100	675	198	86	71	1.02217	24.8735	60	6.40546	0.00397162	12.1332	0.00557066	18.4846	0.0360776	34.4938	0.506723	-660.843	136.067							Y	Rejected	Software or hardware error during the acquisition and/or non steady signal through the acquisition process
PB-7_clumpedLIDI220240717kfactor0	4	ETH-3	100	96	738	198	84	71	1.03656	33.4737	46	6.38686	0.00253788	12.1557	0.00457849	18.3719	0.0261986	25.5623	0.190129	-115.884	65.812	-0.241977	1.07684	-142.466	0.620192	1.72884	-1.81558	Y	Included
PB-7_clumpedLIDI220240717kfactor0	5	ETH-1	86	100	733	205	86	71	1.02762	32.6286	46	6.64174	0.00205292	11.6514	0.00389546	17.7368	0.0221007	44.5854	0.636769	-54.3188	13.7059	-0.636896	20.6626	-82.101	0.193745	2.01898	-2.31185	Y	Considered as outlier	Outlier sensu peirce for raw D47, rd46
PB-7_clumpedLIDI220240717kfactor0	6	ETH-2	109	100	763	125	84	71	1.03663	37.1818	40	-5.38131	0.00193923	-5.07658	0.0018346	-11.2257	0.0191336	-6.20831	0.21496	26.4305	4.4668	-0.718358	3.95912	42.7266	0.202306	-10.1787	-18.7289		Included
PB-7_clumpedLIDI220240717kfactor0	7	ETH-3	108	100	741	183	86	69	1.03546	34.7616	42	6.37532	0.0017753	12.1733	0.00293725	18.368	0.025144	25.6584	0.187484	-53.3838	4.67495	-0.251059	1.1358	-81.8654	0.610349	1.7159	-1.79822		Included
PB-7_clumpedLIDI220240717kfactor0	9	BTCARB05	179	54	748	190	81	71	1.03885	36.5071	44	-1.69613	0.00205476	8.14795	0.00310266	5.92038	0.0225015	18.0323	0.148129	-50.0079	6.59454	-0.323579	1.64311	-63.3428	0.573322	-6.73856	-5.73725		Included
PB-7_clumpedLIDI220240717kfactor0	10	ETH-3	102	100	721	132	84	71	1.03842	32.4835	48	6.38298	0.00192548	12.1903	0.00371795	18.4084	0.0245971	26.038	0.0988203	-78.3983	5.75094	-0.235684	1.47281	-106.164	0.626899	1.72344	-1.7816		Included
PB-7_clumpedLIDI220240717kfactor0	11	IAEA-603	86	100	714	220	262	71	1.04794	30.7338	50	7.02875	0.00212779	11.5972	0.00371887	18.2045	0.0188227	23.6989	0.114408	-97.8142	4.53127	-0.52139	0.361581	-124.585	0.317528	2.43342	-2.36601	Y	Included	Non Condensable Pressure above 150 microbar.
PB-7_clumpedLIDI220240717kfactor0	12	BTCARB10	130	74	738	110	81	71	1.03748	34.3665	44	-1.48277	0.00203152	8.35849	0.004055	6.34502	0.0196731	17.8173	0.141958	-73.3315	5.22018	-0.327314	1.01337	-86.922	0.567848	-6.51891	-5.53075		Included
PB-7_clumpedLIDI220240717kfactor0	13	BTCARB11	163	59	743	183	84	71	1.05729	34.4303	44	-1.5322	0.00176475	7.9019	0.00355435	5.83659	0.0236948	16.5844	0.125164	-73.0105	3.88268	-0.336332	0.706923	-85.7442	0.559764	-6.55482	-5.97948		Included
PB-7_clumpedLIDI220240717kfactor0	14	ETH-1	108	100	775	579	1034	76	1.03753	40.511	37	6.63211	0.00161038	11.74	0.00338191	17.8308	0.0161169	46.9947	0.78883	-82.2035	4.74949	-0.620761	22.8375	-109.311	0.21094	2.00547	-2.22474	YY	Included	leak rate above 500 microbar/min.Non Condensable Pressure above 150 microbar.
PB-7_clumpedLIDI220240717kfactor0	15	ETH-2	79	100	692	234	86	71	1.03509	26.2029	53	-5.3541	0.00230672	-4.99074	0.00389716	-11.0666	0.0213837	-6.51375	0.102617	-71.5435	4.49138	-0.670599	3.47739	-56.9904	0.253603	-10.1529	-18.6446		Included
PB-7_clumpedLIDI220240717kfactor0	19	BTCARB11	162	62	770	1187	975	74	1.03942	38.0523	43	-1.31144	0.0268372	8.33567	0.0513158	6.20785	0.0420571	32.0776	1.32531	533.009	979.538							YY	Rejected	leak rate too high (>1000 microbar/min).Non Condensable Pressure above 150 microbar.
PB-7_clumpedLIDI220240717kfactor0	20	BTCARB05	164	61	765	293	96	74	1.03868	33.6239	47	-1.70515	0.001884	8.19468	0.00388504	5.97006	0.0245318	17.0948	0.218086	-107.344	2.76132	-0.310444	0.627955	-119.946	0.587411	-6.7499	-5.69128		Included
PB-7_clumpedLIDI220240717kfactor0	21	ETH-3	97	100	748	520	992	79	1.03711	34.2028	45	6.37336	0.00208479	12.2687	0.00431753	18.4709	0.0153195	26.5402	0.163398	-227.459	5.13214	-0.240644	1.80763	-250.84	0.621307	1.71031	-1.70446	YY	Included	leak rate above 500 microbar/min.Non Condensable Pressure above 150 microbar.
PB-7_clumpedLIDI220240717kfactor0	22	BDH	78	100	687	220	89	74	1.03682	26.1829	56	6.53908	0.00199373	11.9392	0.00420006	18.0393	0.0244075	25.4596	0.164679	-306.23	4.77159	-0.514232	1.40492	-326.915	0.325849	1.89901	-2.02872		Included
PB-7_clumpedLIDI220240717kfactor0	23	BTCARB10	141	68	741	396	836	74	1.03452	32.9867	45	-1.4889	0.0020367	8.36169	0.00430542	6.32625	0.0194448	18.5489	0.190744	-372.65	4.54909	-0.342748	1.72662	-381.85	0.551162	-6.52556	-5.5276	Y	Included	Non Condensable Pressure above 150 microbar.
PB-7_clumpedLIDI220240717kfactor0	24	BTCARB11	154	63	741	220	84	71	1.02718	33.8837	43	-1.49873	0.00175858	7.9134	0.00408226	5.85398	0.0225723	18.5835	0.136397	-327.408	3.82178	-0.364851	2.65188	-336.685	0.528756	-6.51957	-5.96825		Included
PB-7_clumpedLIDI220240717kfactor0	25	ETH-1	97	100	733	440	919	74	1.03307	33.6187	43	6.62895	0.00191553	11.7498	0.00358905	17.8219	0.0233935	90.3363	0.965601	-475.55	9.00498	-0.635763	65.1585	-491.048	0.19469	2.00174	-2.21514	Y	Included	Non Condensable Pressure above 150 microbar.
PB-7_clumpedLIDI220240717kfactor0	26	ETH-4	74	100	697	198	84	69	1.03626	27.769	50	-5.42853	0.0019941	-5.16941	0.00427095	-11.1832	0.0224691	-0.911223	0.151101	-393.265	6.75952	-0.534736	9.49877	-383.488	0.401433	-10.2256	-18.8201		Included
PB-7_clumpedLIDI220240717kfactor0	27	BTCARB05	161	59	733	359	809	71	1.03857	34.3586	46	-1.67469	0.0013838	8.21238	0.00361274	5.99066	0.0241243	19.4266	0.135928	-353.259	5.92289	-0.33869	2.88678	-362.432	0.556689	-6.71808	-5.67396	Y	Included	Non Condensable Pressure above 150 microbar.
PB-7_clumpedLIDI220240717kfactor0	29	ETH-3	87	100	689	344	806	69	1.03817	28.217	54	6.33635	0.00198871	12.267	0.00347804	18.417	0.0241934	22.3995	0.263035	-425.699	4.37632	-0.253943	-2.22976	-443.057	0.607056	1.67093	-1.70611	Y	Included	Non Condensable Pressure above 150 microbar.
PB-7_clumpedLIDI220240717kfactor0	30	IAEA-603	87	100	706	234	84	69	1.03592	30.4913	49	7.03226	0.00156539	11.5639	0.00389789	18.1615	0.0254664	23.8658	0.0947507	-403.663	5.47621	-0.534861	0.590563	-421.323	0.303053	2.43838	-2.39874		Included
PB-7_clumpedLIDI220240717kfactor0	31	BTCARB11	156	62	748	388	850	74	1.04036	36.0875	42	-1.53967	0.00179238	7.94714	0.00372255	5.84438	0.0193335	18.834	0.169574	-274.84	5.65814	-0.364995	2.83132	-284.859	0.528632	-6.56443	-5.93499	Y	Included	Non Condensable Pressure above 150 microbar.
PB-7_clumpedLIDI220240717kfactor0	32	BTCARB10	136	69	719	198	84	71	1.03739	30.7305	47	-1.50186	0.00166838	8.29018	0.00401145	6.25585	0.0206552	18.749	0.119227	-256.543	7.21052	-0.329606	2.06555	-267.334	0.565659	-6.53674	-5.59786		Included
PB-7_clumpedLIDI220240717kfactor0	33	ETH-2	102	100	758	381	848	74	1.03515	36.3972	39	-5.38711	0.00165285	-5.01464	0.00385547	-11.1661	0.0204425	-6.8197	0.159082	-177.83	7.06471	-0.713235	3.21656	-164.874	0.207666	-10.1872	-18.6681	Y	Included	Non Condensable Pressure above 150 microbar.
PB-7_clumpedLIDI220240717kfactor0	34	BDH	104	100	755	476	894	74	1.02614	36.0417	39	6.49789	0.00210779	11.8706	0.00389138	17.9336	0.0201045	20.8534	0.171436	-356.402	3.97676	-0.509108	-2.95798	-375.481	0.331763	1.85763	-2.09611	Y	Included	Non Condensable Pressure above 150 microbar.
PB-7_clumpedLIDI220240717kfactor0	35	BTCARB05	157	61	731	300	640	71	1.03784	32.1992	49	-1.70935	0.00214503	8.18415	0.00468371	5.97928	0.022393	14.2702	0.420183	-333.39	10.6385	-0.286673	-2.13008	-342.785	0.613177	-6.75398	-5.70163	Y	Included	Non Condensable Pressure above 150 microbar.
PB-7_clumpedLIDI220240717kfactor0	37	ETH-3	112	100	763	410	814	74	1.04519	38.0447	42	6.35539	0.00182888	12.2199	0.00334411	18.4293	0.0205004	24.3224	0.162297	-248.274	4.43631							Y	Rejected	Non Condensable Pressure above 150 microbar.
PB-7_clumpedLIDI220240717kfactor0	38	ETH-4	92	100	699	256	86	71	1.0367	27.1862	54	-5.422	0.00162823	-5.15596	0.00337942	-11.097	0.0276017	-7.27891	0.134752	-166.93	3.75669	-0.467739	3.03762	-153.535	0.473852	-10.2192	-18.8069		Included
PB-7_clumpedLIDI220240717kfactor0	39	BTCARB11	171	59	777	454	880	74	1.03525	40.2255	38	-1.51538	0.00145346	7.95827	0.00288992	5.89875	0.0211585	18.9077	0.219126	-128.689	3.24653	-0.346902	2.88174	-140.768	0.548084	-6.53896	-5.9241	Y	Included	Non Condensable Pressure above 150 microbar.
PB-7_clumpedLIDI220240717kfactor0	40	BTCARB10	132	72	728	227	86	71	1.03831	31.4691	47	-1.48705	0.00168376	8.33127	0.00499273	6.29704	0.0241205	19.1771	0.186687	-129.523	5.05068	-0.344034	2.40492	-142.239	0.549864	-6.52247	-5.5575		Included
PB-7_clumpedLIDI220240717kfactor0	41	ETH-2	114	89	780	447	855	74	1.03275	41.6463	36	6.64589	0.00152607	11.7645	0.00425465	17.8429	0.0205332	69.7599	0.668312	-139.882	4.26812	-0.646759	45.0269	-165.338	0.182686	2.01925	-2.2007	YY	Considered as outlier	Non Condensable Pressure above 150 microbar.Outlier sensu peirce for raw D47, rd45
PB-7_clumpedLIDI220240717kfactor0	43	BTCARB10	129	73	726	388	733	74	1.0385	30.5481	52	-1.49394	0.00191615	8.33068	0.00396091	6.29686	0.0212396	20.7778	0.12706	-161.955	3.59722	-0.336515	3.98046	-174.191	0.558024	-6.52979	-5.55807	Y	Included	Non Condensable Pressure above 150 microbar.
PB-7_clumpedLIDI220240717kfactor0	44	ETH-2	114	100	787	234	179	74	1.03741	41.3352	39	-5.3588	0.00117232	-5.0163	0.0020361	-11.1312	0.0176278	-5.8634	0.168236	-82.299	3.54029	-0.705738	4.18587	-67.8627	0.215685	-10.157	-18.6697	Y	Included	Non Condensable Pressure above 150 microbar.
PB-7_clumpedLIDI220240717kfactor0	45	BTCARB05	175	57	770	322	631	74	1.03881	38.0827	41	-1.6943	0.00199436	8.23057	0.00421971	6.00666	0.0226761	19.1741	0.158084	-121.995	8.2286	-0.320258	2.60214	-134.461	0.576638	-6.73965	-5.65604	Y	Included	Non Condensable Pressure above 150 microbar.
PB-7_clumpedLIDI220240717kfactor0	46	BTCARB11	170	60	784	264	89	71	1.03831	41.3128	38	-1.55243	0.00165554	7.86297	0.00409582	5.81489	0.0205565	17.8347	0.202707	-161.777	9.7988	-0.299045	2.01506	-173.211	0.600301	-6.57494	-6.01771		Included
PB-7_clumpedLIDI220240717kfactor0	47	ETH-1	86	100	721	505	970	74	1.03509	30.4603	49	6.61465	0.00193532	11.7089	0.00369272	17.7449	0.0229785	191.395	0.890518	-367.165	14.1071	-0.657042	163.977	-385.808	0.171854	1.98799	-2.25527	YY	Included	leak rate above 500 microbar/min.Non Condensable Pressure above 150 microbar.
PB-7_clumpedLIDI220240717kfactor0	48	ETH-2	96	100	745	264	86	71	1.03754	33.6699	43	-5.37624	0.0015634	-5.03174	0.00360073	-11.1991	0.0217398	6.23222	0.186899	-122.579	14.1035	-0.74097	16.4353	-108.732	0.177678	-10.175	-18.6849		Included
PB-7_clumpedLIDI220240717kfactor0	49	ETH-3	109	100	765	513	980	76	1.03598	37.9129	39	6.35956	0.00176293	12.2081	0.00348122	18.3758	0.0223078	28.2312	0.13151	-232.661	8.00953	-0.261115	3.57808	-255.786	0.599409	1.69783	-1.76398	YY	Included	leak rate above 500 microbar/min.Non Condensable Pressure above 150 microbar.
PB-8_clumpedLIDI220240719_nokfactorcorrection	1	ETH-3	88	98	675	15	79	67	1.03622	26.5139	59	6.41267	0.00343674	12.1914	0.00636177	18.3777	0.0239701	28.2182	0.264182	-52.774	3.97676	-0.297334	3.59853	-81.3425	0.542381	1.76893	-1.76029	Y	Considered as outlier	First sample of of the carousel is always spurious
PB-8_clumpedLIDI220240719_nokfactorcorrection	2	ETH-3	93	100	723	176	533	69	1.03657	30.6745	51	6.3921	0.00190169	12.2785	0.00408091	18.5078	0.0213391	25.8665	0.270947	-15.4147	5.22423	-0.233225	1.13077	-45.2506	0.612749	1.74383	-1.6746	YY	Included	Non Condensable Pressure above 150 microbar.
PB-8_clumpedLIDI220240719_nokfactorcorrection	3	ETH-3	89	100	716	205	84	69	1.06058	30.9014	51	6.3615	0.00174592	12.2087	0.00414536	18.3885	0.0228179	25.8202	0.347834	-12.5122	3.55634	-0.251111	1.22375	-42.2752	0.593362	1.7138	-1.74318	Y	Included
PB-8_clumpedLIDI220240719_nokfactorcorrection	4	ETH-3	84	100	679	330	731	71	1.05417	25.8297	58	6.37623	0.00201871	12.2291	0.00385655	18.4495	0.0231211	25.2457	0.25311	-24.2681	4.16148	-0.226161	0.622637	-53.7291	0.620717	1.72873	-1.72313	YY	Included	Non Condensable Pressure above 150 microbar.
PB-8_clumpedLIDI220240719_nokfactorcorrection	5	ETH-1	79	100	682	190	84	69	1.02263	26.5467	55	6.64884	0.002283	11.7066	0.00305612	17.8261	0.0232062	91.6131	0.873896	-66.7838	3.87992	-0.610097	66.4968	-94.3039	0.198834	2.03825	-2.23724	Y	Included
PB-8_clumpedLIDI220240719_nokfactorcorrection	6	ETH-2	85	100	697	637	885	69	1.01779	27.7117	51	-5.37832	0.00225693	-5.02948	0.0024937	-11.1549	0.0224445	-6.90381	0.143512	-9.90723	3.7688	-0.696412	3.16153	5.71513	0.189119	-10.1563	-18.6599	YY	Included	leak rate above 500 microbar/min.Non Condensable Pressure above 150 microbar.
PB-8_clumpedLIDI220240719_nokfactorcorrection	7	ETH-3	87	100	699	440	792	69	1.02558	29.4802	49	6.2499	0.00169169	12.1626	0.00359265	18.273	0.0237477	26.2907	0.178544	-138.567	3.80049	-0.205394	1.77423	-164.357	0.644158	1.59662	-1.78825	Y	Included	Non Condensable Pressure above 150 microbar.
PB-8_clumpedLIDI220240719_nokfactorcorrection	9	BTCARB05	159	58	726	205	81	69	1.03679	33.356	48	-1.68884	0.00129016	8.15007	0.0024508	5.98214	0.0232756	15.7457	0.228993	-112.864	4.21946	-0.27181	-0.610898	-125.327	0.607138	-6.71195	-5.71431		Included
PB-8_clumpedLIDI220240719_nokfactorcorrection	10	ETH-3	97	100	716	293	699	69	1.02003	32.4205	48	6.37024	0.00171904	12.2281	0.00324774	18.408	0.0237065	25.2446	0.161493	-84.3529	3.77601	-0.259778	0.623633	-111.992	0.583739	1.7224	-1.72415	Y	Included	Non Condensable Pressure above 150 microbar.
PB-8_clumpedLIDI220240719_nokfactorcorrection	11	IAEA-603	105	100	753	205	84	69	1.03841	38.8202	41	7.05878	0.00173877	11.5962	0.0029746	18.2445	0.0193746	24.4747	0.204237	-85.5111	3.18944	-0.51186	1.12165	-112.674	0.306017	2.47894	-2.34669		Included
PB-8_clumpedLIDI220240719_nokfactorcorrection	12	BTCARB10	137	68	728	322	770	69	1.03582	33.8648	45	-1.46879	0.00143774	8.37802	0.00309611	6.39036	0.0228108	18.5513	0.161535	-74.1841	3.45242	-0.315755	1.69649	-87.8103	0.557435	-6.48594	-5.49076	Y	Included	Non Condensable Pressure above 150 microbar.
PB-8_clumpedLIDI220240719_nokfactorcorrection	13	BTCARB11	148	64	741	205	84	67	1.03981	35.709	42	-1.51504	0.00165253	7.92246	0.00335021	5.87925	0.02245	16.9387	0.211365	-83.9006	4.53184	-0.331724	1.01483	-96.5374	0.541319	-6.51847	-5.93841		Included
PB-8_clumpedLIDI220240719_nokfactorcorrection	14	ETH-1	77	100	672	454	870	69	1.03685	25.9092	56	6.64204	0.00202723	11.7411	0.00332489	17.8445	0.024468	71.5217	0.41375	-157.998	4.89546	-0.618465	46.7964	-182.877	0.189545	2.02974	-2.20339	Y	Included	Non Condensable Pressure above 150 microbar.
PB-8_clumpedLIDI220240719_nokfactorcorrection	15	ETH-2	77	100	677	220	84	69	1.04826	25.4259	56	-5.392	0.00177369	-5.06227	0.00319228	-11.2014	0.0233994	-4.26855	0.150253	-44.4056	3.91792	-0.696803	5.8898	-29.2504	0.188824	-10.1697	-18.6921		Included
PB-8_clumpedLIDI220240719_nokfactorcorrection	17	BTCARB05	165	57	733	220	84	69	1.03935	33.1913	48	-1.69499	0.00217085	8.15699	0.0040094	5.91273	0.0225638	18.7824	0.153263	-64.9409	3.49362	-0.341174	2.36314	-78.0837	0.530791	-6.71876	-5.7075		Included
PB-8_clumpedLIDI220240719_nokfactorcorrection	18	ETH-3	89	100	709	454	980	74	1.03665	29.7063	53	6.36995	0.00209584	12.2452	0.00307896	18.4853	0.0245431	25.4616	0.210904	-93.7529	3.54887	-0.200214	0.80148	-121.138	0.649247	1.72146	-1.70727	Y	Included	Non Condensable Pressure above 150 microbar.
PB-8_clumpedLIDI220240719_nokfactorcorrection	19	BTCARB10	124	74	716	205	86	71	1.0575	29.7539	53	-1.47729	0.00177271	8.31391	0.00383182	6.35553	0.019874	17.4314	0.165528	-78.3181	3.61326	-0.279086	0.722347	-91.7618	0.598006	-6.49264	-5.55376		Included
PB-8_clumpedLIDI220240719_nokfactorcorrection	20	BTCARB11	165	60	772	454	936	76	1.03584	38.8066	40	-1.51696	0.00130995	7.95158	0.0034804	5.9744	0.0195324	17.319	0.186526	-124.584	2.41602	-0.263571	1.33137	-136.707	0.616254	-6.52159	-5.90978	Y	Considered as outlier	Non Condensable Pressure above 150 microbar. Outlier sensu peirce for raw D47.
PB-8_clumpedLIDI220240719_nokfactorcorrection	21	ETH-1	84	100	706	410	772	74	1.03579	28.3556	52	6.61701	0.00180524	11.7517	0.00355883	17.9331	0.0188381	120.231	0.509228	-190.84	2.66178	-0.516158	94.3585	-214.744	0.302192	2.0027	-2.19293	YY	Considered as outlier	Non Condensable Pressure above 150 microbar.Outlier sensu peirce for raw D47, rd45, rd47
PB-8_clumpedLIDI220240719_nokfactorcorrection	22	ETH-4	85	100	704	388	826	74	1.02869	27.2885	52	-5.43945	0.00168007	-5.15017	0.00313743	-11.087	0.025963	-1.15389	0.147636	-73.5056	3.08855	-0.445179	9.21455	-58.6007	0.466186	-10.217	-18.7784	Y	Included	Non Condensable Pressure above 150 microbar.
PB-8_clumpedLIDI220240719_nokfactorcorrection	23	BTCARB05	184	53	765	366	701	74	1.03663	37.728	39	-1.69945	0.00136697	8.21098	0.00266148	5.97854	0.020868	19.7116	0.20906	-63.6489	2.38778	-0.323788	3.16994	-76.9025	0.549784	-6.72549	-5.65443	Y	Included	Non Condensable Pressure above 150 microbar.
PB-8_clumpedLIDI220240719_nokfactorcorrection	25	ETH-3	95	9	67	872	631	67	0.00281101	0.0424142	100	-0.627644	0.243772	0.645174	0.341229	-14.2318	1.49259	3816.68	39.418	-52588.5	1804.48							YYYYYY	Rejected	Sample pressure too low (<600 microbar).Bad adjustment between the belows.leak rate above 500 microbar/min.Non Condensable Pressure above 150 microbar.Extreme bellow position.
PB-8_clumpedLIDI220240719_nokfactorcorrection	26	IAEA-603	95	100	733	234	584	74	1.03927	32.6005	49	7.10878	0.00632499	11.7429	0.0130835	18.3666	0.0257976	27.1158	0.128566	23.0973	26.5789	-0.585689	3.41149	-7.62644	0.224176	2.52681	-2.20261	Y	Considered as outlier	Non Condensable Pressure above 150 microbar. Outlier sensu peirce for raw D47.
PB-8_clumpedLIDI220240719_nokfactorcorrection	29	BTCARB10	140	69	753	242	831	74	1.04005	34.3624	47	-1.40201	0.0105237	8.53474	0.0226368	6.44028	0.0324519	18.5811	0.40809	55.1914	65.7808	-0.487872	1.41455	39.2695	0.367333	-6.42056	-5.33687	Y	Considered as outlier	Non Condensable Pressure above 150 microbar. Outlier for all rd and raw D47
PB-8_clumpedLIDI220240719_nokfactorcorrection	30	ETH-2	99	100	750	300	660	71	1.05835	33.9239	47	-5.38102	0.00183416	-5.02078	0.00354189	-11.1668	0.0229236	-5.7596	0.116755	-97.721	5.94063	-0.714202	4.29977	-83.4973	0.16952	-10.1595	-18.6513	Y	Included	Non Condensable Pressure above 150 microbar.
PB-8_clumpedLIDI220240719_nokfactorcorrection	31	BTCARB05	172	55	745	440	882	71	1.03795	36.1138	43	-1.46141	0.00162784	8.2765	0.00355084	6.32465	0.025417	20.8681	0.163452	-115.805	6.05681	-0.289706	4.17713	-128.653	0.586377	-6.47435	-5.59056	Y	Included	Non Condensable Pressure above 150 microbar.
PB-8_clumpedLIDI220240719_nokfactorcorrection	33	ETH-3	81	100	653	366	701	69	1.03375	23.5067	62	6.34336	0.00212336	12.1408	0.00393264	18.2918	0.0240049	25.9291	0.126468	-175.454	4.7944	-0.261543	1.46437	-200.185	0.582134	1.69696	-1.80983	Y	Included	Non Condensable Pressure above 150 microbar.
PB-8_clumpedLIDI220240719_nokfactorcorrection	34	ETH-4	113	100	626	322	509	69	1.05736	20.1266	71	-5.4272	0.00196295	-5.16463	0.0031691	-11.0763	0.0250381	-7.72129	0.110923	-153.29	6.38177	-0.432802	2.60812	-139.656	0.479814	-10.2034	-18.7926	Y	Included	Non Condensable Pressure above 150 microbar.
PB-8_clumpedLIDI220240719_nokfactorcorrection	35	BTCARB11	150	64	745	652	855	71	1.03634	35.5791	42	-1.52436	0.00120112	7.92896	0.00528445	5.87581	0.0212607	17.6623	0.133005	-88.3057	4.43376	-0.331846	1.71416	-100.884	0.541194	-6.52864	-5.93201	YY	Included	leak rate above 500 microbar/min.Non Condensable Pressure above 150 microbar.
PB-8_clumpedLIDI220240719_nokfactorcorrection	36	BTCARB10	130	71	719	234	299	69	1.03739	31.3103	46	-1.48169	0.00174091	8.29524	0.00256536	6.31363	0.0233052	18.6912	0.115285	-127.666	5.09332	-0.29797	1.99856	-140.355	0.577289	-6.49664	-5.57209	Y	Included	Non Condensable Pressure above 150 microbar.
PB-8_clumpedLIDI220240719_nokfactorcorrection	37	ETH-1	97	100	753	227	233	69	1.04067	37.99	43	6.63541	0.00148942	11.698	0.00244102	17.8337	0.0200115	173.886	0.936472	-289.279	7.09992	-0.580476	146.896	-310.216	0.231503	2.02427	-2.24573	Y	Included	Non Condensable Pressure above 150 microbar.
PB-8_clumpedLIDI220240719_nokfactorcorrection	39	BTCARB10	123	73	699	249	469	69	1.04032	28.6542	55	-1.42591	0.00483009	8.41106	0.0102863	6.44774	0.0263153	36.9792	0.324958	-193.241	13.8386	-0.335249	19.7526	-205.203	0.53575	-6.44148	-5.45839	Y	Included	Non Condensable Pressure above 150 microbar.
PB-8_clumpedLIDI220240719_nokfactorcorrection	40	ETH-2	97	100	748	366	81	69	1.03632	34.2993	46	-5.40562	0.00145911	-5.07772	0.00263779	-11.199	0.0229596	-2.37163	0.13968	-127.732	7.34253	-0.66503	7.83736	-113.858	0.223883	-10.1836	-18.7072		Included
PB-8_clumpedLIDI220240719_nokfactorcorrection	41	BTCARB05	169	56	738	278	665	69	1.04031	35.3084	44	-1.7011	0.00167934	8.18552	0.00324649	5.99571	0.020611	20.5068	0.142326	-136.346	8.49252	-0.280212	4.00296	-148.527	0.597825	-6.72631	-5.67944	Y	Included	Non Condensable Pressure above 150 microbar.
PB-8_clumpedLIDI220240719_nokfactorcorrection	42	BTCARB11	173	56	760	227	84	67	1.03547	40.0127	39	-1.50875	0.00141617	7.92119	0.00261156	5.9136	0.0214215	19.4521	0.137188	-147.526	6.10864	-0.302842	3.49144	-159.289	0.573092	-6.51173	-5.93967		Included
PB-8_clumpedLIDI220240719_nokfactorcorrection	43	ETH-1	76	100	667	264	523	67	1.03572	25.3535	58	6.64153	0.00182961	11.6799	0.00426767	17.8254	0.0208455	244.173	0.995184	-475.927	5.24743	-0.577258	215.611	-491.351	0.235079	2.03145	-2.26354	Y	Included	Non Condensable Pressure above 150 microbar.
PB-8_clumpedLIDI220240719_nokfactorcorrection	44	ETH-2	100	100	726	249	84	69	1.03502	32.7187	45	-5.39986	0.00164439	-5.05375	0.0030506	-11.1647	0.0233007	2.32549	0.175432	-128.016	4.70286	-0.660038	12.5338	-114.194	0.229291	-10.1784	-18.6837		Included
PB-8_clumpedLIDI220240719_nokfactorcorrection	45	ETH-3	80	100	658	271	540	69	1.03656	24.4753	58	6.38984	0.0020414	12.2357	0.0037138	18.5373	0.0199316	30.117	0.132641	-226.243	6.84271	-0.160369	5.36376	-249.626	0.693068	1.74299	-1.71664	Y	Considered as outlier	Non Condensable Pressure above 150 microbar. Outlier sensu peirce for raw D47.
PB-8_clumpedLIDI220240719_nokfactorcorrection	46	18T183	146	58	660	256	89	67	1.05264	24.3603	58	-1.2479	0.0020428	5.03578	0.00335364	3.31724	0.0239953	14.3389	0.120732	-202.118	5.66807	-0.338414	4.19953	-208.903	0.541498	-6.12787	-8.77623		Included
PB-8_clumpedLIDI220240719_nokfactorcorrection	47	18TJ31	593	14	682	286	633	69	1.0383	27.0173	58	-0.656094	0.00173747	6.63677	0.00334907	5.52793	0.0243538	18.9149	0.137804	-173.294	5.25105	-0.313476	5.52371	-183.4	0.562495	-5.55637	-7.20398	Y	Included	Non Condensable Pressure above 150 microbar.

## Sheet: other info
N samples (anchors + unknowns) 199 (4 + 195)
N analyses (anchors + unknowns) 1039 (383 + 656)
Repeatability of δ13C_VPDB 87.3 ppm
Repeatability of δ18O_VSMOW 131.6 ppm
Repeatability of Δ47 (anchors) 33.5 ppm
Repeatability of Δ47 (unknowns) 27.1 ppm
Repeatability of Δ47 (all) 29.8 ppm
Model degrees of freedom 760
Student's 95% t-factor 1.96
Standardization method pooled
Session Na Nu d13Cwg_VPDB d18Owg_VSMOW r_d13C r_d18O r_D47 a ± SE 1e3 x b ± SE c ± SE
–––––––––––––––––––––––––––––––––––––––––––––– –– –– ––––––––––– –––––––––––– –––––– –––––– –––––– ––––––––––––– ––––––––––––– ––––––––––––––
PB-10_clumpedLIDI220240726_noKfactorcorrection 14 22 -4.615 25.022 0.0484 0.0804 0.0000 0.998 ± 0.033 2.222 ± 0.515 -0.854 ± 0.016
PB-11_clumpedLIDI220241204 11 21 -4.682 24.874 0.0584 0.0781 0.0000 1.010 ± 0.035 5.769 ± 0.558 -0.910 ± 0.016
PB-12_clumpedLIDI220241206 18 23 -4.676 24.877 0.0335 0.0638 0.0000 0.898 ± 0.029 5.793 ± 0.457 -0.868 ± 0.014
PB-13_clumpedLIDI-120241210unbrack 17 27 -4.662 24.929 0.0155 0.0337 0.0000 0.933 ± 0.030 5.607 ± 0.468 -0.900 ± 0.014
PB-14_clumpedLIDI220241212 14 23 -4.665 24.909 0.0142 0.0366 0.0000 0.969 ± 0.031 4.697 ± 0.507 -0.902 ± 0.015
PB-15_clumpedLIDI220241213 16 24 -4.677 24.901 0.0389 0.0712 0.0000 0.948 ± 0.033 5.193 ± 0.525 -0.885 ± 0.016
PB-16_clumpedLIDI220241216 8 11 -4.666 24.902 0.0135 0.0278 0.0000 0.917 ± 0.044 6.168 ± 0.646 -0.845 ± 0.022
PB-17_clumpedLIDI220241219 8 9 -4.657 24.946 0.0061 0.0341 0.0000 0.968 ± 0.044 5.454 ± 0.736 -0.882 ± 0.023
PB-18_clumpedLIDI220241217 7 14 -4.661 24.931 0.0090 0.0320 0.0000 0.936 ± 0.043 6.150 ± 0.730 -0.864 ± 0.023
PB-19_clumpedLIDI220250115 12 30 -4.671 24.866 0.0297 0.0919 0.0000 1.012 ± 0.032 3.369 ± 0.541 -0.843 ± 0.016
PB-20_clumpedLIDI220250117 9 21 -4.662 24.904 0.0161 0.0555 0.0000 0.904 ± 0.039 4.179 ± 0.641 -0.825 ± 0.019
PB-21_clumpedLIDI220250120 9 25 -4.649 24.919 0.0185 0.0419 0.0000 0.973 ± 0.038 5.197 ± 0.640 -0.873 ± 0.020
PB-22_clumpedLIDI220250122 15 24 -4.698 24.840 0.0472 0.0843 0.0000 0.923 ± 0.030 5.146 ± 0.547 -0.846 ± 0.015
PB-23_clumpedLIDI220250124 16 25 -4.652 24.885 0.0101 0.0449 0.0000 0.958 ± 0.030 5.371 ± 0.464 -0.869 ± 0.014
PB-24_clumpedLIDI220250128 14 28 -4.665 24.876 0.0162 0.0591 0.0000 0.836 ± 0.030 4.769 ± 0.508 -0.815 ± 0.014
PB-25_clumpedLIDI2202501230 18 26 -4.654 24.875 0.0082 0.0436 0.0000 0.916 ± 0.028 5.657 ± 0.446 -0.870 ± 0.013
PB-26_clumpedLIDI220250203 17 23 -4.657 24.861 0.0149 0.0420 0.0000 0.956 ± 0.033 3.432 ± 0.511 -0.852 ± 0.016
PB-27_clumpedLIDI220250205 15 27 -4.651 24.861 0.0074 0.0314 0.0000 0.941 ± 0.029 4.603 ± 0.475 -0.882 ± 0.014
PB-28_clumpedLIDI220250207 20 24 -4.648 24.877 0.0117 0.0507 0.0000 0.928 ± 0.029 4.204 ± 0.459 -0.874 ± 0.014
PB-2_clumpedLIDI220240523bis 9 29 -4.620 24.745 0.1832 0.2771 0.0000 1.018 ± 0.038 4.625 ± 0.629 -0.927 ± 0.020
PB-30_clumpedLIDI220250212 17 25 -4.662 24.863 0.0472 0.1271 0.0000 0.927 ± 0.030 4.501 ± 0.470 -0.847 ± 0.014
PB-31_clumpedLIDI220250217 19 24 -4.665 24.849 0.0236 0.0774 0.0000 0.919 ± 0.026 3.749 ± 0.438 -0.823 ± 0.013
PB-32_clumpedLIDI220250219 17 29 -4.647 24.875 0.0697 0.1046 0.0000 0.935 ± 0.027 3.942 ± 0.458 -0.860 ± 0.014
PB-3_clumpedLIDI220240611bis 12 24 -4.617 25.017 0.0061 0.0378 0.0000 0.940 ± 0.032 4.703 ± 0.507 -0.871 ± 0.015
PB-5_clumpedLIDI220240626bis 9 30 -4.658 24.909 0.0609 0.1274 0.0000 0.921 ± 0.035 5.479 ± 0.531 -0.897 ± 0.016
PB-6_clumpedLIDI220240715_re 7 18 -4.579 25.027 0.1795 0.0341 0.0000 0.804 ± 0.052 3.713 ± 0.716 -0.800 ± 0.023
PB-7_clumpedLIDI220240717kfactor0 17 25 -4.631 24.999 0.0260 0.0434 0.0000 0.921 ± 0.032 3.085 ± 0.472 -0.870 ± 0.014
PB-8_clumpedLIDI220240719_nokfactorcorrection 18 25 -4.614 25.022 0.0330 0.0364 0.0000 0.906 ± 0.033 2.675 ± 0.490 -0.838 ± 0.015
–––––––––––––––––––––––––––––––––––––––––––––– –– –– ––––––––––– –––––––––––– –––––– –––––– –––––– ––––––––––––– ––––––––––––– ––––––––––––––
