# Supplementary material for: Climate changes in Anatolia across the late Eocene and the Eocene-Oligocene Transition: successive warming and cooling, aridification, and implications for the westward dispersal of Asian terrestrial mammals
Source: Copernicus journal article supplement (doi:10.5194/egusphere-2025-6383), 2026-01-23
Supplement: Supplementary file 9 [file Supplementary table 5 - d18O water.xlsx]

## Sheet: Feuil1
Sample	d18O_calcite_VPDB	Temp_C	d18O_water_VSMOW
18CIC09	-6.12	25.4	-3.66207
BTCARB05	-5.72	24.1	-3.5243
BTCARB08	-5.55	24.2	-3.3336
BTCARB09	-5.58	24.1	-3.38399
BTCARB10	-5.56	37.4	-0.771593
18CIC10	-5.84	30.7	-2.33098
18CIC11	-6.52	35.3	-2.13073
BTCARB11	-5.88	37.2	-1.13051
BTCARB13	-6.14	28.7	-3.02409
BTCARB15	-5.90	31.6	-2.21636
BTCARB16	-4.25	27.3	-1.40614
BTCARB17	-6.05	25.4	-3.5919
BTCARB18	-5.58	30.3	-2.14812
BTCARB24	-5.59	21.6	-3.90661
